1  
2  
3  
4  
5  
6  
7  
8  
9  
10  
11  
12  
13  
14  
15  
16  
17  
18  
19  
20  
21  
22  
23  
24  
25  
26  
27  
28  
29  
30  
31  
32  
33  
34  
35  
36  
37  
38  
39

**Phenotypic and genomic diversification in complex carbohydrate degrading human gut bacteria**

Nicholas A. Pudlo<sup>1\*</sup>, Karthik Urs<sup>1\*</sup>, Ryan Crawford<sup>2</sup>, Ali Pirani<sup>1</sup>, Todd Atherly<sup>3,4</sup>, Roberto Jimenez<sup>5</sup>, Nicolas Terrapon<sup>6,7</sup>, Bernard Henrissat<sup>6,7,8</sup>, Daniel Peterson<sup>5,9</sup>, Cherie Ziemer<sup>3,4</sup>, Evan Snitkin<sup>1</sup> and Eric C. Martens<sup>1</sup>

<sup>1</sup>Department of Microbiology and Immunology, University of Michigan Medical School, Ann Arbor, MI 48109

<sup>2</sup>Department of Computational Medicine and Bioinformatics, University of Michigan Medical School, Ann Arbor, MI 48109

<sup>3</sup>Iowa State University, Dept. of Animal Science, Ames, IA

<sup>4</sup>United States Department of Agriculture Agricultural Research Station, Ames, IA

<sup>5</sup>University of Nebraska, Department of Food Sciences, Lincoln, NE

<sup>6</sup>Aix Marseille Univ, CNRS, UMR7257 AFMB, Marseille, France

<sup>7</sup>INRAE, USC1408 AFMB, Marseille, France

<sup>8</sup>Department of Biological Sciences, King Abdulaziz University, Jeddah, Saudi Arabia

<sup>9</sup>Johns Hopkins University, Department of Pathology, Baltimore, MD

\*Authors contributed equally to this work

Correspondence to: [emartens@umich.edu](mailto:emartens@umich.edu)

**Running Title:** *Bacteroidetes* carbohydrate utilization

40 **Abstract**

41 Symbiotic bacteria are responsible for the majority of complex carbohydrate digestion in  
42 the human colon. Since the identities and amounts of dietary polysaccharides directly impact the  
43 gut microbiota, determining which microorganisms consume specific nutrients is central to  
44 defining the relationship between diet and gut microbial ecology. Using a custom phenotyping  
45 array, we determined carbohydrate utilization profiles for 354 members of the Bacteroidetes, a  
46 dominant saccharolytic phylum. There was wide variation in the numbers and types of substrates  
47 degraded by individual bacteria, but phenotype-based clustering grouped members of the same  
48 species indicating that each species performs characteristic roles. The ability to utilize dietary  
49 polysaccharides and endogenous mucin glycans was negatively correlated, suggesting exclusion  
50 between these niches. By analyzing related *Bacteroides ovatus/xylanisolvens* strains that vary in  
51 their ability to utilize mucin glycans, we addressed whether gene clusters that confer this  
52 complex, multi-locus trait are being gained or lost in individual strains. Pangenome  
53 reconstruction of these strains revealed a remarkably mosaic architecture in which genes  
54 involved in polysaccharide metabolism are highly variable and bioinformatics data provide  
55 evidence of interspecies gene transfer that might explain this genomic heterogeneity. Global  
56 transcriptomic analyses suggest that the ability to utilize mucin has been lost in some lineages of  
57 *B. ovatus* and *B. xylanisolvens*, which still harbor residual gene clusters that are involved in  
58 mucin utilization by strains that still actively express this phenotype. Our data provide insight  
59 into the breadth and complexity of carbohydrate metabolism in the microbiome and the  
60 underlying genomic events that shape these behaviors.

61

62

63

## 64 **Introduction**

65           Microbial communities in the distal intestines of humans and other mammals play critical  
66 roles in the digestion of dietary polysaccharides (1-3). Unlike proteins, lipids and simple sugars,  
67 which can be assimilated in the small intestine, the vast majority of non-starch polysaccharides  
68 (fibers) transit undegraded to the distal gut due to a lack of requisite enzymes encoded in the  
69 human genome (4). Microbial transformation of dietary fiber polysaccharides into host-  
70 absorbable organic and short chain fatty acids is a beneficial process that unlocks otherwise  
71 unusable calories from our diet (5), shapes the composition and behavior of the gut microbial  
72 community (6-8), provides preferred nutrients directly to the colonic epithelium (9-11) and  
73 shapes the development of immune cell populations (12, 13).

74           The abundance of dietary fiber in the mammalian diet, and the substantial chemical  
75 diversity within this class of molecules, provides a prominent selective pressure that drives  
76 genome evolution and diversification within symbiotic bacterial populations. The genomes of  
77 individual human gut bacteria frequently encode dozens-hundreds more polysaccharide-  
78 degrading enzymes than human secrete into the gastrointestinal tract, reflecting gut microbial  
79 adaptations to degrade dietary fibers (3, 4). As examples, the genomes of a few well-studied  
80 Gram-negative *Bacteroides* (*B. thetaiotaomicron*, *B. ovatus* and *B. cellulosylyticus*) encode  
81 between 250 and over 400 CAZymes that collectively equip them to target nearly all commonly  
82 available dietary polysaccharides (14-16). However, none of these three species is by itself  
83 capable of degrading all available polysaccharides, a conclusion that was supported by early  
84 phenotypic surveys of cultured human gut bacteria that encompassed species from other phyla  
85 (17, 18). These findings suggest that individual microbes fill multiple, specific carbohydrate  
86 degradation niches and that a diverse community is required to ensure degradation of the entire

87 repertoire of dietary fibers. Given that hundreds of different microbial species typically coexist in  
88 an individual over long time periods (19), it is important to understand how many different  
89 polysaccharide metabolism pathways are present within the individual microbial species that  
90 compose a community and how these traits are represented across strains and species. If some  
91 species possess very similar phenotypic abilities, they may be functional surrogates or compete  
92 for similar niches and therefore seldom co-occur.

93         Members of the Bacteroidetes are often among the most numerous bacteria in the colonic  
94 microbiota of people from industrialized countries (19-21). These bacteria are well appreciated  
95 for their abilities to degrade a broad range of polysaccharides (16-18, 22, 23) and modify disease  
96 states in a bacterial species-specific fashion (24-26). In this study, we empirically measured the  
97 abilities of members of 29 different Bacteroidetes species to grow on a custom panel of  
98 carbohydrates that span the diversity of plant, animal and microbial polysaccharides. Our results  
99 reveal a wide range of metabolic breadth between different species, indicating that some have  
100 evolved to be carbohydrate generalists while others have become metabolically specialized to  
101 target just one or a few nutrients. Pangenome analysis of several related strains provides insight  
102 into the evolutionary events that shape carbohydrate utilization among these important symbionts  
103 and reveals a dizzying mosaic of heterogeneity at the level of discrete gene clusters mediating  
104 polysaccharide metabolism. Based on analysis of several variable loci, we provide evidence to  
105 support a mechanism of lateral gene transfer that may account for this mosaic architecture. Our  
106 results provide a glimpse into the metabolic breadth and diversity of an important group of  
107 human gut bacteria towards polysaccharide metabolism. Given the large amount of genomic and  
108 metagenomic sequence information that has been generated from the human microbiome,

109 phenotypic studies such as the one presented here represent important next steps in deciphering  
110 the functionality of these organisms in their native gut habitat.

111

## 112 **Results**

113 Phenotypes are the ultimate measures of biological function. However, large-scale  
114 phenotypic analyses are still uncommon in surveys of the human gut microbiome, which have  
115 instead relied on sequence-based approaches to infer function, often with substantial uncertainty.  
116 This lack of phenotypic information is partly due to a lack of high-density (*e.g.*, strain level)  
117 culture representation for the dominant taxa combined with a lack of defined growth conditions  
118 to measure behavior of these organisms. With the resurgence of gut microbial culturing, both of  
119 these gaps have begun to close (27-30), revealing an urgent need for scalable platforms to define  
120 the actual behavior of these organisms. To address this gap, we assembled a collection of human  
121 and animal gut Bacteroidetes and constructed a custom anaerobic phenotyping platform centered  
122 around carbohydrate metabolism, a key function that symbiotic gut microorganisms contribute to  
123 mammalian digestion (4). This array consists of 45 different carbohydrates (30 polysaccharides  
124 and 15 monosaccharides) that span the repertoire of common sugars and linkages present in  
125 dietary plants and meat, as well as host mucosal secretions and some rare nutrients consumed in  
126 regional populations or as food additives (see **Fig. S1** for a summary of polysaccharide  
127 structures).

128 The carbohydrate utilization abilities of 354 different human and animal Bacteroidetes  
129 strains were measured by individually inoculating each into this custom growth array and  
130 automatically monitoring anaerobic growth every 10-20 min for four days (see *Materials and*

131 *Methods*). Based on 16S rRNA gene sequence for each strain, this collection encompasses 29  
132 different species based on the requirement that each strain possesses  $\geq 98\%$  16S rRNA gene  
133 identity to a named type strain in a given species (**Table S1**, note that all but three strains, which  
134 were all related to each other and to *Bacteroides uniformis*, met this criterion). The resulting  
135 31,860 individual growth curves were first inspected manually and then subjected to automated  
136 analysis to quantify total growth and growth rate parameters for each substrate (see *Materials*  
137 *and Methods*). A normalization scheme was employed to compensate for general growth  
138 differences in the two different defined medium formulations employed (see **Table S1** for a full  
139 list of strains assayed and all raw and normalized growth measurements, **Fig. S2** for analysis of  
140 replicates).

#### 141 **Members of the same species possess similar carbohydrate utilization profiles**

142 Growth results are summarized in **Figs. 1, 2** and **S3**. Whether considered from the  
143 perspective of how many species degrade a particular polysaccharide (**Fig. 1A**), or how many  
144 individual polysaccharides are targeted by members of a particular species (**Fig. 1B**), there was  
145 substantial variability in carbohydrate utilization among the organisms surveyed (range, 1-28  
146 polysaccharides degraded per strain; mean, 15.6). Some polysaccharides like soluble  
147 starch/glycogen were degraded by a majority of the species tested, yet others like the edible  
148 seaweed polysaccharides carrageenan and porphyran were used by just one or two strains.

149 Given the diversity in observed carbohydrate utilization phenotypes, we wished to  
150 address if closely related strains display similar abilities or instead if strains of the same species  
151 have diverged from one another. To assist in visualizing the overall trends in carbohydrate  
152 utilization across this phylum, we performed unsupervised clustering of the strains based on their  
153 carbohydrate utilization profiles. While many species are not deeply represented by multiple

154 strains, clustering based on a combination of normalized growth and rate measurements largely  
155 grouped strains of the same species together (**Fig. 2**) and, as expected, this was driven mostly by  
156 polysaccharide utilization abilities (**Fig. S4**).

157 Our data reveal that strains belonging to several individual species possess more similar  
158 polysaccharide degrading abilities to each other compared to their more distant relatives, a  
159 finding that has importance for interpreting or predicting function based on community  
160 sequencing data. As examples, all 56 strains of *B. fragilis* clustered together, reflecting their  
161 generally restricted abilities to utilize forms of soluble starch/glycogen, inulin and mucus *O*-  
162 glycans. Likewise, all 36 strains of *B. uniformis*, a species with broader metabolic capacity that  
163 includes digestion of plant cell wall hemicelluloses, were also grouped together into a single  
164 branch. The inclusivity of these groupings was generally independent of the time period when  
165 strains were isolated or whether they were isolated from humans or other mammals (**Fig. 2**).

166 Another important feature of the observed species clustering is that the grouping does not  
167 mirror the overall phylogeny of the gut Bacteroidetes. Rather, phylogenetically separated species  
168 often group adjacent to one another based on similarities in carbohydrate metabolism (*e.g.*, *B.*  
169 *ovatus/xylanisolvans* and *B. cellulosilyticus*; and *B. vulgatus/dorei* and *B. fragilis*; see **Fig. 3A**  
170 for a phylogenetic tree based on conserved housekeeping genes) (31, 32). In the latter case, it is  
171 interesting to directly compare *B. fragilis* and *B. vulgatus/dorei*, two groups with deep strain  
172 representation (**Fig. 2**). Despite being phylogenetically more distant, these species possess very  
173 similar phenotypic patterns that reflect degradation of soluble starch and similar molecules  
174 (glycogen, pullulan), inulin and mucin *O*-glycans. The major distinguishing feature between  
175 these groups is the presence of some, often-weak, pectin utilization among strains of *B.*  
176 *vulgatus/dorei*.

177           Some polysaccharides, especially those present in the cell walls of dietary plants, occur in  
178 the same physical context and presumably traverse the gut together, potentially exerting selective  
179 pressure for bacteria to use them simultaneously. To test for co-occurrence of traits, we  
180 performed a pairwise correlation analysis to determine the extent to which any two  
181 polysaccharides were co-utilized by the same strain (**Fig. S5**). The presence of two different  
182 soluble starches (potato and maize amylopectin) and two starch-like glycans (glycogen and  
183 pullulan) provide an internal control since they are essentially identical in their sugar and linkage  
184 chemistry but vary in the proportion and placement of branches as well as polymer length,  
185 crystallinity and solubility (**Fig. S1**). These four molecules are utilized through a single  
186 degradation/transport system in the type strain of *B. thetaiotaomicron*, which was included in our  
187 study (33). As expected, the abilities to use these four polysaccharides were among the strongest  
188 positive correlations (between 44-75%); although, there was not a perfect correlation suggesting  
189 that some finer adaptation may exist even for different structural forms of a chemically similar  
190 molecule.

191           We also observed positive correlations in the ability to use components of two different  
192 groups of plant cell wall polysaccharides (pectins and hemicelluloses), as well as animal tissue  
193 glycosaminoglycans, despite the fact that the polysaccharides within each of these groups often  
194 possess different chemical structures (**Fig. S1**). In the case of the hemicelluloses, there was even  
195 some apparent separation based on dicotyledonous vs. monocotyledonous sources. The  
196 predominantly dicot hemicelluloses (**Fig. 2**, blue labels) and monocot hemicelluloses (**Fig. 2**,  
197 green labels) show some exclusivity with respect to the bacteria that utilize them. Many *B.*  
198 *ovatus*/*B. xylanisolvens* strains lack the ability to utilize the three dicot hemicelluloses (GalM,  
199 GlcM, XyG); whereas the ability to degrade those from monocots (OSX, WAX, BBG) is more



200 evenly distributed. *B. uniformis* has a partially opposite pattern, preferring substrates from dicots,  
201 while only degrading one of the two major monocot structures (BBG) and poorly degrading the  
202 two xylans tested (OSX, WAX). Similar observations were also made for pectins and GAGs and  
203 could reflect adaptations to simultaneously harvest different nutrients from digesta particles  
204 derived from dicot plant cell walls or animal tissue ingested in a carnivorous diet.

205

### 206 **Specialization for mucus *O*-linked glycans**

207         The most noteworthy correlation between polysaccharide utilization traits was observed  
208 between utilization of host-produced mucin *O*-glycans and many of the other polysaccharides  
209 tested. Growth on a total of 19/30 polysaccharides showed negative correlations with the ability  
210 to utilize *O*-glycans, with the strongest negative correlations being between *O*-glycans and the  
211 seven different hemicelluloses (**Fig. S5**). This negative correlation is easily observed by  
212 comparing the rightmost column in **Fig. 2** (*O*-glycan utilization) with the respective columns for  
213 hemicellulose degradation. Because this trend was observed across several species, it suggests  
214 that there could be a more general exclusive relationship between the two niches associated with  
215 foraging on mucus and hemicellulose. This idea is further supported by experiments described  
216 below, which suggest that isolates of *B. ovatus* and *B. xylanisolvens*, both adept hemicellulose  
217 consumers, are in the process of losing the ability to degrade *O*-glycans, relative to an ancestor  
218 that contained multiple gene clusters involved in the metabolism of these structures.

219         Interestingly, the mucin *O*-glycan mixture was the only substrate for which we observed  
220 absolute metabolic specialization among the substrates tested. A single, and only available strain  
221 of *Barnesiella intestinhominis* exhibited the ability to exclusively utilize mucin *O*-glycans, along  
222 with a subset of the sugars that are contained in these structures (**Table S1**). Three strains of

223 *Bacteroides massiliensis* exhibited similar behavior with very strong growth on mucin *O*-glycans  
224 and only weak growth on soluble starches and a few other polysaccharides (**Table S1**). These  
225 three *B. massiliensis* strains were also restricted in the repertoire of simple sugars they could  
226 metabolize with this list being limited to those found in mucin and other host glycans (galactose,  
227 *N*-acetylgalactosamine, *N*-acetylglucosamine, *N*-acetylneuraminic acid and L-fucose; weak  
228 fructose utilization by one strain was the only exception). Members of these two species are  
229 poorly represented in culture collections and remain lightly studied. However, their specific  
230 adaptations for host mucin glycans may render them important members of the microbiota,  
231 potentially thriving at the interface between the gut lumen and host tissue and relying exclusively  
232 on the host to be sustained. The continuous supply of mucin *in vivo* could explain why some  
233 species have become specialized for it as a nutrient, whereas dietary fiber degraders may need to  
234 be more generalist since the substrates available to them change with the host's meals.

235

## 236 **Pangenome reconstruction reveals extensive genetic diversification among related**

### 237 ***Bacteroides***

238 With a view of the carbohydrate utilization traits present in our gut Bacteroidetes  
239 collection, we next sought to determine if certain variable traits were being gained or lost within  
240 strains of certain species and if available genomes provide insight into the mechanisms driving  
241 genomic adaptations to particular nutrients. Connections between polysaccharide utilization  
242 phenotypes and the underlying genes involved have been systematically explored for a few  
243 *Bacteroides* species (*B. thetaiotaomicron*, *B. ovatus* and *B. cellulosilyticus*) with partial analyses  
244 in others (6, 16, 22, 23, 34-37). These studies have revealed that, in essentially all cases, the  
245 ability to degrade a particular polysaccharide is conferred by one or more clusters of co-

246 expressed genes termed polysaccharide utilization loci (PULs) (38). PULs share defining  
247 features such as genes encoding homologs of outer membrane TonB-dependent transporters  
248 (SusC-like), surface glycan-binding proteins (SGBPs; or SusD- and SusE/F-like), usually an  
249 associated sensor/transcriptional regulator and one or more degradative CAZymes (glycoside  
250 hydrolase, GH; polysaccharide lyase, PL; carbohydrate esterase, CE), as well as other enzymes  
251 like sulfatases or proteases. Since the presence of one or more cognate PULs is required to utilize  
252 a given polysaccharide and these genes typically exhibit large increases in gene expression in  
253 response to their growth substrate, we rationalized that we could focus on traits that were  
254 variable in closely related strains and locate the associated PULs by transcriptomic analysis to  
255 gain insight into the basis of their acquisition or loss.

256 To test this, we focused on members of two closely related species, *B. ovatus* (*Bo*) and *B.*  
257 *xylanisolvens* (*Bx*), for which there is noticeable inter-strain variation in the ability to use mucin  
258 *O*-glycans (**Figs. 2, 3**). Investigation of these two species also benefits from substantial culture  
259 depth and many strains with available sequences. The *O*-glycans attached to mucins represent a  
260 diverse family of over one hundred different structures (39), albeit with common linkage patterns  
261 (**Fig. S1**). Correspondingly, the ability to utilize these glycans is a complex trait, involving  
262 simultaneous expression of at least 6-13 different *O*-glycan inducible PULs in *B.*  
263 *thetaitaomicron*, *B. massiliensis*, *B. fragilis* and *B. caccae* (6, 22, 35). Quantification of *O*-  
264 glycan growth for individual *Bo* and *Bx* strains was widely variable (**Fig. 3B**). One hypothesis to  
265 explain this variability is that some *Bo* and *Bx* strains have gained the ability to utilize *O*-glycans  
266 relative to an ancestor that lacked this phenotype. If so, the PULs they express during *O*-glycan  
267 degradation might be unique to their genomes and may indicate lateral gene transfer (LGT) as  
268 has been the case for acquisition of phenotypes such as porphyran, agarose and  $\lambda$ -carrageenan

269 utilization in gut *Bacteroides*, which are all components of integrative conjugative elements or  
270 mobilizable plasmids (31, 40). An alternative hypothesis is that some *Bo* and *Bx* strains are in the  
271 process of losing this ability from a common ancestor. If so, the genomes of non-degraders may  
272 still contain some PULs that are homologous to those present in more proficient *O*-glycan-  
273 degrading strains, but these strains may have lost a key step(s) that has eroded their ability to  
274 express this phenotype.

275 To distinguish these hypotheses, we selected seven strains (black arrows in **Fig. 3B**) that  
276 vary in their ability to degrade *O*-glycans and for which genome sequences exist. Note that three  
277 strains that degrade *O*-glycans were initially chosen because they were among the strongest  
278 degraders in our dataset with sequenced genomes when we initiated these experiments. We later  
279 identified strains with better *O*-glycan growth abilities and address one of these (strain H59)  
280 separately below. Four of the selected strains were *Bo* (two positive and two negative for *O*-  
281 glycan degradation); three strains were *Bx* (one weakly positive and two negative for *O*-glycan  
282 degradation). One of these strains (*B. xylanisolvens* XB1A) has a finished circular genome and  
283 was used as a scaffold to align the remaining six draft genome sequences, with manual curation  
284 (see *Material and Methods*), resulting in a nearly contiguous pangenome sequence that captures  
285 the spatial arrangement of homologous and variable genes that are present in these seven strains  
286 (**Table S2, Fig. S6**).

287 Analysis of the *Bo/Bx* pangenome revealed remarkable variability in gene content among  
288 just the seven strains used. A total of 12,960 different genes were delineated based on  $\geq 90\%$   
289 identity in their translated amino acid sequence (**Table S2**). Remarkably, only 2,264 (17.5%) of  
290 these genes were shared among all seven strains. The largest proportion of genes (7,244; 55.9%)  
291 was only present in one of the seven strains. Separating two major classes of core PUL functions,

292 SusC/D homologs and degradative CAZymes (GH, PL and CE), revealed that these key  
293 components of Bacteroidetes polysaccharide metabolism were also heavily represented in the  
294 “accessory gene” pool that is not common to all strains (**Fig. 4A**).

295 Through informatics-based and manual annotation of gene clusters containing typical  
296 PUL functions, we delineated between 180-236 different PULs in the reconstructed pangenome  
297 (ambiguity is caused by many PULs occurring adjacent to each other; although in many cases  
298 separation of adjacent PULs according to individual genomes allowed us to make more precise  
299 delineations, **Table S3**). Direct comparison of the *O*-glycan-degrading and non-degrading strains  
300 revealed that there was a substantial number of genes (3,351) that were unique to the three *O*-  
301 glycan degrading strains, including genes belonging to 51 PULs (**Fig. 4B**). However, such a  
302 distribution in gene content might be expected given the overall large proportion of non-core  
303 genes in these seven strains and there was correspondingly no indication that all three *O*-glycan-  
304 degrading strains shared overlapping PULs with each other: no PULs were common to all three  
305 *O*-glycan degraders and only five PULs were shared by any two strains (**Fig. 4C**). Considering  
306 that there are 51 total PULs that are unique to the mucin-degrading strains, if these strains have  
307 gained the ability to degrade *O*-glycans from an ancestral lineage that lacked this ability it likely  
308 occurred by acquisition of separate gene clusters. To more directly distinguish between the two  
309 hypotheses given above, we performed transcriptional profiling on all three *O*-glycan degrading  
310 strains to determine if the PUL genes that they express during *O*-glycan degradation are indeed  
311 unique to these strains.

312 Compared to reference growth in minimal medium containing glucose (MM-glucose), the  
313 *Bx* D22, *Bo* 3-1-23 and *Bo* D2 strains activated expression of 196, 227 and 359 total genes more  
314 than 10-fold and these gene lists included components of 14, 19, and 42 different PULs,

315 respectively (**Tables S4-6**). As expected from studies in other *Bacteroides*, these PULs were  
316 scattered throughout the genome (**Fig. S7**), suggesting that they are autonomously regulated in  
317 response to glycan cues present in the *O*-glycan mixture. Strikingly, the majority of PULs that  
318 contained *O*-glycan-activated genes (63/75, 84%) were *not* unique to the *O*-glycan degrading  
319 strains (**Tables S4-S6, Fig. S7**). Moreover, in each of the three strains analyzed, the most highly  
320 upregulated PULs were also often shared with non-mucin degrading strains. These observations  
321 lend support to the hypothesis that strains of *Bo* and *Bx* are in the process of losing the ability to  
322 utilize *O*-glycans relative to a common ancestor that possessed a more expansive gene repertoire  
323 to successfully access these nutrients. However, we cannot rule out that individual non-degrading  
324 strains are separately acquiring PULs that are associated with mucin degradation and retaining  
325 them without the full benefit that presumably occurs with the ability to fully execute this growth  
326 phenotype. This latter idea is consistent with inter-species PUL exchange observations  
327 elaborated on below.

328         Finally, because we subsequently identified a *B. ovatus* strain (NLAE-zl-H59, red arrow  
329 in **Fig. 3B.**) with a substantially higher ability to use *O*-glycans relative to the strains used for  
330 pangenome construction, we performed additional RNA-seq analysis on this strain. Compared to  
331 a glucose reference, this strain activated 373 total genes in response to *O*-glycans, including  
332 genes from 30 different PULs (**Table S7**). Among these, 26 activated PULs were also present in  
333 one of the seven strains in our pangenome and 24 were homologous to PULs in strains that did  
334 not degrade *O*-glycans. However, this strain did activate expression of genes within four PULs  
335 that were completely unique to its genome compared to the seven strains used for pangenome  
336 reconstruction, suggesting that it could possess additional genes that augment its ability to grow  
337 on mucin *O*-glycans. This increased PUL expression could be responsible for the enhanced

338 growth of the H59 strain on *O*-glycans, especially if genes included within these unique PULs  
339 are responsible for key metabolic steps required for efficient *O*-glycan utilization.

340

### 341 **Evidence that intergenomic recombination has driven *Bacteroides* pangenome evolution**

342 Similar to other bacteria, we observed that many accessory genes in the *Bo* and *Bx*  
343 pangenome are located in contiguous clusters or “islands” often involving PULs or capsular  
344 polysaccharide synthesis gene cluster (**Fig. S6, Table S2**). In contrast to previously identified  
345 *Bacteroides* PULs that have more obviously been subjects of lateral transfer (31, 40, 41) and are  
346 associated with integrative and conjugative elements (ICEs), most of the variable genomic  
347 regions that we identified were not associated with functions indicative of mobile DNA. Instead,  
348 these regions are often precisely located in between one or more core genes (*i.e.*, those common  
349 to all seven strains; herein referred to as “genomic nodes”) that flank each side of the variable  
350 gene segment (**Fig. 5A,B**).

351 Several intergenomic transfer mechanisms might cause the observed mosaic structure of  
352 the *Bo-Bx* pangenome. The first possibility is movement of variable genes into a recipient  
353 genome by direct conjugation of individual, mobile ICEs. While such events would be expected  
354 to leave behind residual genes involved in mobilization and transfer, which were not observed,  
355 these DNA vehicles are known to target a subset of core genes, such as tRNAs (41), and may  
356 have undergone subsequent genomic deletion events that eliminated the mobile DNA. Two other  
357 known mechanisms of bacterial LGT are natural competence and phage transduction, neither of  
358 which has been observed in members of the Bacteroidetes.

359 A final potential mechanism is direct conjugation of the chromosome from a donor  
360 bacterium into a related recipient, followed by subsequent homologous recombination between

361 flanking nodes to add or delete intervening DNA in the recipient genome (**Fig. 5C**). A  
362 mechanism that is conceptually similar to high-frequency recombination (Hfr) transfer in *E. coli*  
363 has been described for *B. thetaiotaomicron* and *B. fragilis* and involves chromosomal ICEs,  
364 which may have lost their ability to transfer autonomously by circularizing from the genome and  
365 instead act as transfer initiation points to conjugate a donor genome into a recipient (42-44). If  
366 such a mechanism was more broadly active in LGT between *Bacteroides*, we would expect that  
367 some of the core/node genes involved would reflect sequence identities that were more similar to  
368 the donor and this difference would be more easily detectable if the transfer was between  
369 members of different species like *Bo* and *Bx*. Moreover, such transfer events could either result  
370 in introduction of new genes into the recipient or elimination of genes depending on the genetic  
371 content in between recombination nodes from the donor chromosome.

372         To test this hypothesis, we took a bioinformatics approach aimed at first identifying high-  
373 confidence examples of inter-species recombination involving core genes and then assessed  
374 whether those genes were associated with co-transfer of adjacent accessory genes (**Fig. 6A**). We  
375 collected a dataset of 33 *Bo* and *Bx* genomes, which represent a subsample of the isolates for  
376 which we generated phenotypic data. We identified a set of 1,384 core genes—expectedly  
377 smaller than the core genome of the seven strains used above due to additional strains being  
378 added—that are present as a single copy in all members of both species. To identify cases of  
379 putative inter-species LGT via homologous recombination at core genes, we searched for  
380 instances in which a core gene sequence was more similar to the corresponding sequence from  
381 the other species than to sequences of the species to which a strain belonged. To this end, for  
382 each allele of each core gene, we calculated the median distance to all other alleles of both  
383 species (**Fig. 6B**). We identified instances where the median distance to the same species was



384 high and median distance to the opposite species was low and used these genes as markers for  
385 putative LGT core loci. To identify additional accessory genes that may have been  
386 simultaneously transferred, we searched for instances in which genes were perfectly syntenic and  
387 collinear between each genome with a putative LGT core gene and genomes of the opposite  
388 species. Among these candidate LGT loci, we then investigated if any of these transfer events  
389 have resulted in pan-genome diversification, which we defined as the presence of any accessory  
390 gene(s) that was only observed adjacent to a core gene with evidence of LGT based on the above  
391 criteria.

392 In total, we identified 29 different loci at which exchange of core genes appeared to have  
393 occurred and LGT accessory genes were identified, including seven that appeared to involve  
394 transfer of PULs (**Fig. 6C, Fig. S8**). Similar numbers of potentially transferred loci were  
395 identified for each species, with 16 loci in *Bx* and 13 loci in *Bo*. Within the identified HGT  
396 events, variable numbers of HGT accessory genes were found within the loci ranging from one  
397 to thirteen genes (**Fig. 6C, Fig. S8**). More genes (57 total) appeared to be transferred into *Bo*  
398 than into *Bx* (36 total).

399 Finally, we determined if any of the identified LGT events could explain differential  
400 phenotypes measured by our high throughput growth assay by modifying the complement of  
401 PULs in individual genomes. As a specific example, we focused on a PUL that was previously  
402 associated with  $\beta$ -mannan degradation (23, 45) that was among our candidate loci with evidence  
403 of transfer from a *Bx* ancestor into two *Bo* strains. The presence of this PUL (PUL-A in **Fig. 6C,**  
404 **Fig. S9A**) was observed in all strains with the ability to grow on the  $\beta$ -mannan galactomannan  
405 (GalM), including two strains of *Bo* (ATCC8483 and CL02T12C04) for which the flanking node  
406 regions were more similar to *Bx*. We previously showed that deletion of this PUL from *B. ovatus*

407 ATCC8483 eliminated growth on GalM and glucomannan (GluM) (45), suggesting that it was  
408 both acquired from a *Bx* strain and conferred growth on these two  $\beta$ -mannans. However, the  
409 presence of this PUL was not perfectly correlated with growth on GalM and several strains that  
410 lacked PUL-A still exhibited robust growth. Thus, we searched for other PULs that harbor GH26  
411 family enzymes and determined that all of the other strains that grow on GalM, but lack PUL-A,  
412 harbor another candidate GalM PUL (PUL-B, **Fig. S9A**) at a different genomic location and  
413 some strains possess both (**Fig. 6C**). Gene expression analysis by qPCR revealed that PUL-B  
414 was highly expressed in strains that lacked PUL-A during growth in GalM (**Fig. S9B**) and every  
415 strain that grew robustly on GalM had at least one of these two PULs. While we had previously  
416 shown that PUL-A was required for GluM growth in *B. ovatus* ATCC8483, there were a number  
417 of other strains (red “+” symbols in **Fig. 6C**) that displayed some ability to grow only on GlcM,  
418 while lacking both of the GalM-associated PULs, suggesting the presence of additional, partially  
419 orthogonal PULs that confer the ability to grow on variant  $\beta$ -mannans. Such a presence of  
420 multiple orthologous PULs that confer the same or similar functions, and some which may be  
421 moving between genomes of related species by the putative LGT mechanisms noted above,  
422 complicates the process of understanding the genotype-phenotype relationships in human gut  
423 Bacteroidetes, but will need to be resolved to make better functional predictions from sequence-  
424 based data.

425

## 426 **Discussion**

427 In this study we leveraged a scalable, high-throughput quantitative growth platform to  
428 characterize the phenotypic abilities that are present in a sample of hundreds of Bacteroidetes  
429 strains from the human and animal gut. Our anaerobic screening technique is directly applicable

430 to other bacterial phyla from the human gut and other environments. Moreover, it can be adapted  
431 to include new polysaccharides or to focus on different nutrient utilization or chemical resistance  
432 phenotypes. The current study, in concert with future applications of phenotypic screening, will  
433 help close the gap between our largely sequence-based view of the human gut microbiota and the  
434 functions that its members provide. However, instances like the ones investigated here for mucin  
435 glycan and  $\beta$ -mannan utilization by *Bacteroides* serve as a warning that the presence or absence  
436 of genes that are experimentally associated with a particular function do not always indicate that  
437 the phenotype is expressed or not.

438 Pangenome reconstruction for *Bo* and *Bx* revealed extensive variability between strains of  
439 these closely related species, which is not unexpected for bacteria that engage in LGT. However,  
440 the lack of mobile DNA signatures for the majority of accessory genes and evidence of inter-  
441 genomic recombination between species at core genes provides new insight into what may be a  
442 prominent mechanism of genome diversification in members of this phylum. The previously  
443 described intergenomic transfer mechanisms in *B. thetaiotaomicron* and *B. fragilis* required the  
444 presence of active or inactive ICEs, highlighting the potential roles for these mobile elements in  
445 not just shaping genomes directly but also indirectly through their ability to catalyze exchange of  
446 broader genomic segments. In *B. thetaiotaomicron*, genome transfer was determined to initiate at  
447 genomically-integrated ICEs of which there are four in the type strain of *B. thetaiotaomicron*  
448 (VPI-5482). These have not been shown to be fully functional for circularization and  
449 mobilization. However, introduction and activation of an additional, excision-proficient  
450 conjugative transposon (either cTnDOT or cTnERL) (42), which share common features with the  
451 genomic ICEs, catalyzed expression of genes in the genomic ICEs and transfer of parts of the  
452 genome in a manner that requires *recA* and homologous DNA to be present in the recipient (42).

453 An additional study in *B. fragilis* showed that conjugation from a strain with multiple genomic  
454 ICEs, with one or more presumably retaining transfer activity, results in transfer of up to 435Kb  
455 of chromosome into a recipient that initiates near genomic ICEs, with individual transfer events  
456 being of variable size. The latter observation suggests that intergenomic recombination could  
457 then occur at different homologous regions (*i.e.*, the core gene nodes observed in the  
458 pangenome), which could depend on the amount of genomic DNA transferred and the  
459 length/homology of available recombination sites. Given that the number of ICEs in individual  
460 genomes is variable, and their ability to be activated by functional conjugative transposons that  
461 are circulating in the ecosystem may also vary, it will be interesting to determine in future work  
462 if there are hotspots for genome transfer or if certain strains/species are dominant genome donors  
463 that could play a disproportionate role.

464 The phenotypic similarity between members of the same species (*e.g.*, *Bo* and *Bx*) and the  
465 large amount of gene diversity, including genes involved in carbohydrate metabolism, presents a  
466 paradox and raises the question of why the genome diversification observed in strains of *Bo* and  
467 *Bx* has not pushed members of these species to behave more differently and cluster based on  
468 phenotype with members of other species. One answer may be the apparent exclusion of some  
469 traits, such as mucin *O*-glycan/hemicellulose metabolism, which may limit the fitness advantage  
470 associated with acquiring new phenotypes. A second emerges from the proposed genome-  
471 exchange mechanism for which we offer new experimental support. Since this intergenomic  
472 exchange relies on homologous recombination, its frequency should decrease between genomes  
473 that are more divergent. Thus, this strategy may be one mechanism through which only closely  
474 related bacteria can share traits that are advantageous with other close relatives. The presence of  
475 orthologous PULs that confer the same function (*e.g.*, GluM and GalM utilization), some of

476 which appear to be subjected to LGT, further complicates interpretations of genotype-to-  
477 phenotype relationships in these bacteria. Notably, the genome transfer mechanism proposed  
478 here does not account for how new genes can be incorporated between conserved nodes. Rather,  
479 this variability must pre-exist among different strains and therefore be created by different inter-  
480 and intragenomic diversification mechanisms. Nevertheless, the data that we report here  
481 underscore the notion that individual gut symbiont genomes are not just highly variable, but also  
482 dynamically so.

483

## 484 **Materials and methods**

### 485 **Bacterial strains and growth conditions**

486 A total of 354 human and animal gut Bacteroidetes were included in this study. A  
487 complete list is provided in **Table S1**, along with species designation based on 16S rRNA gene  
488 sequencing and associated meta-data. Dr. Abigail Salyers (University of Illinois, Urbana-  
489 Champagne) kindly provided many of the strains and two large portions of this collection were  
490 isolated over several decades: 99 strains with “WH” designations were collected from fecal  
491 samples of healthy human volunteers as part of the Woods Hole Summer Course on Microbial  
492 Diversity in the late 1990s; 95 additional strains with “VPI” designations were collected from  
493 human samples at the Virginia Polytechnic Institute in the 1960s-1970s. Species classifications  
494 were made based on alignment of a minimum of 734 bp of 16S rRNA gene sequence to a  
495 database containing the type strains of >29 named human gut Bacteroidetes species using the  
496 `classify.seqs` command with Bayesian settings in the program `mothur` (46); assignment for each  
497 strain was also manually checked by Blast (47). Isolates with  $\geq 98\%$  16 rDNA gene sequence  
498 identity to the type strain of a named species were labeled with that species designation. This

499 classification strategy included all except for three of the 354 strains examined, which ranged  
500 between 96.6 to 96.7% sequence identity to the *B. uniformis* ATCC type strains and based on  
501 sequential isolate numbers might be clones from the same individual (see WH15, WH16, WH17  
502 entries in **Table S1**). Because of the small number of strains that did not satisfy our 98% cutoff,  
503 we grouped these unclassified strains with their nearest relative and label them as more divergent  
504 in **Table S1**; although, in most cases the carbohydrate phenotypes of these strains were very  
505 similar to other members of the *B. uniformis* group.

506 All strains were routinely grown in an anaerobic chamber (Coy Lab Products, Grass  
507 Lake, MI) at 37°C under an atmosphere of 5% H<sub>2</sub>, 5% CO<sub>2</sub>, and 90% N<sub>2</sub> on brain-heart infusion  
508 (BHI, Beckton Dickinson) agar that included 10% defibrinated horse blood (Colorado Serum  
509 Co.) and gentamicin (200 µg/ml). A single colony was picked into either tryptone-yeast extract-  
510 glucose (TYG) media (48) or modified chopped-meat carbohydrate broth (**Table S8**) and then  
511 sub-cultured into a minimal medium (MM) formulation that contained a mixture of  
512 monosaccharides, vitamins, nucleotides, amino acids and trace minerals (**Table S2** provides  
513 components and a complete recipe).

514

### 515 **Carbohydrate growth array setup and data collection**

516 Two different minimal medium formulations were used in the carbohydrate growth  
517 arrays (**Table S1** lists the formulation used for each isolate). The simpler of the two formulations  
518 (medium 1) was identical to the above MM, except that no carbohydrates were included and the  
519 medium was prepared at 2X concentration. The second minimal medium formulation (medium  
520 2) was identical to medium 1, but included beef extract (0.5% w/v final concentration) as an  
521 additional supplement. We initially attempted to cultivate all of the species tested using only

522 medium 1, but determined that beef extract was specifically required to allow growth of some  
523 species, especially *Parabacteroides* spp., *Barnesiella intestinihominis*, *Odoribacter splanchnicus*  
524 and the branch of *Bacteroides* that includes *B. plebeius* and *B. massiliensis*. Growth in the  
525 absence of an added carbohydrate source was generally not observed or very low, except with  
526 *Parabacteroides* that may be able to grow to a low level on the added 0.5% beef extract. The  
527 corresponding negative control wells for each strain assayed were averaged and this value  
528 subtracted from the total growth calculation of the corresponding to strain on other carbohydrates  
529 tested. Despite several attempts to supplement minimal media with different components or  
530 employ more stringent anaerobic methods, we were unable to cultivate several common  
531 Bacteroidetes genera/species (*Prevotella* spp., *Paraprevotella* spp., *Alistipes* spp., and  
532 *Bacteroides coprocola* and *Bacteroides coprophilus*) in these two MM formulations and  
533 therefore did not include them in this study. All of these isolates readily grew in rich medium,  
534 suggesting that they have specific nutritional requirements that were not met in the MM  
535 formulations used.

536 Carbohydrate growth arrays were run as described previously (23) using a list of 45  
537 carbohydrates (**Table S9**) that were present in duplicate, non-adjacent wells of a 96-well plate;  
538 two additional wells contained no carbohydrate and served as negative controls. Each MM was  
539 prepared as a 2X concentrated stock without carbohydrates (MM-no carb). An aliquot of each  
540 strain was taken from a MM-monosaccharides culture (grown for 16-20 h) and was centrifuged  
541 to pellet cells. Bacteria were resuspended in the same volume of 2X MM-no carb and then  
542 centrifuged again prior to suspension in a volume of 2X MM-no carb that was equal to the  
543 original volume. These washed bacterial cells were then inoculated at a 1:50 ratio into 2X MM-  
544 no carb and the suspension was added in equal volume (100 $\mu$ l/well) to the 96 wells of the

545 carbohydrate growth array. Each well of the carbohydrate growth array contained 100 $\mu$ l of 2X  
546 carbohydrate stock (10-20mg/ml); thus, when diluted 2-fold resulted in 1X MM containing a  
547 unique carbohydrate and a bacterial inoculum that was identical to other wells. Growth arrays  
548 were monitored at kinetic intervals of 10-20 minutes using a microplate stacking device and  
549 coupled absorbance reader (Biotek Instruments; Winooski, VT) and data recorded for 4 d  
550 (variable kinetic interval times reflect variations in the number of microtiter plates present in a  
551 given batch).

552

### 553 **Carbohydrate growth array data processing**

554 Growth data were processed according to the following workflow: 1. data for each strain  
555 were exported from Gen5 software (Biotek Instruments; Winooski, VT) into Microsoft Excel  
556 and a previously described automated script was employed to call the points at which growth  
557 began (min) and ended (max) (23); 2. Each file was manually checked to validate that  
558 appropriate calls were made and the min and max values edited if needed (generally, only due to  
559 obvious baselining artifacts or erroneously high calls caused by temporary bubbles or  
560 precipitation); 3. “total growth” ( $A_{600 \text{ max}} - A_{600 \text{ min}}$ ) and “growth rate” [ $(A_{600 \text{ max}} - A_{600 \text{ min}}) /$   
561  $(t_{\text{max}} - t_{\text{min}})$ ] were calculated for each strain on each substrate ( $A_{600}$  is the absorbance value at  
562 600 nm that corresponds to each min and max point;  $t$  is the corresponding time values in  
563 minutes); 4. Individual cultures in which total growth was  $\leq 0.1$  were scored as “no growth” and  
564 their  $A_{600}$  values converted to 0. Only assays in which both replicates showed an increase in  $A_{600}$   
565  $\geq 0.1$  were considered as growth; if the two replicate assays were discordant (one positive, one  
566 negative), then both values were converted to zero.



567 To normalize the results for each strain, the substrate(s) that provided maximum total  
568 growth and growth rate values were determined and these were set to 1.0. All other growth  
569 values for a given strain were normalized to this maximum value, providing a range of values  
570 between 0 and 1.0. We next normalized growth ability across individual substrates using the  
571 previously normalized values for each individual strain: the strain with the maximum total  
572 growth and growth rate values were identified (many of these were already set to 1.0). Then, the  
573 corresponding values for each other species on that particular substrate were calculated as a  
574 fraction of the maximum value for that substrate, yielding a range of values between 0 and 1.0  
575 for each substrate. These values were used to create the heat map shown in **Figs. 2** and **S3** and all  
576 raw and normalized values are provided in **Table S1**.

577

#### 578 **Data clustering and statistics**

579 Heatmaps and corresponding dendrograms were generated using the “heatmap” function  
580 in the “stats” package of R (version 3.4.0) which employs unsupervised hierarchical clustering  
581 (complete linkage method) to group similar carbohydrate growth profiles. Pearson Correlation  
582 was used to calculate co-occurrence of the ability to grow on each pair of different substrates.  
583 The normalized growth value for each substrate was compared to the corresponding growth  
584 values on all other substrates using the Pearson correlation test in R and these values are  
585 displayed in the Pearson correlation plot in **Figure S5**.

586

#### 587 **Pangenome reconstruction for *B. ovatus* and *B. xylanisolvens* strains**

588 Since one of the seven strains used for pangenome reconstruction (*B. xylanisolvens*  
589 XB1A) was assembled into a single circular chromosome, we used this genome as a scaffold for

590 the contigs representing the remaining six strains. Contigs from the six unfinished strains were  
591 aligned against the XB1A genome using a combination of Mauve (50), to align and orient larger  
592 contigs, and reciprocal best Blast-hit analysis using  $\geq 90\%$  amino acid identity to identify likely  
593 homologs, to provide finer resolution. Contigs from draft genome assemblies or *Bx* XB1A were  
594 broken as needed to accommodate the inclusion of unique accessory genes, but only in  
595 circumstances where genes on both sides of the break could be aligned to homologs in one or  
596 more genomes with a contig that spanned that break point. After constructing a preliminary  
597 assembly, we analyzed the size distribution of putative homologous ORFs as a measure of  
598 assembly accuracy and to identify variations in genetic organization that might be attributable to  
599 real genetic differences such as frame shifts, which would result in two homologous gene calls of  
600 smaller size in the genome containing the frameshift. Any variation  $>50\%$  of homologous ORF  
601 size was inspected manually using the “orthologous neighborhood viewer, by best Blast hit”  
602 function in the U. S. Dept. of Energy Integrated Microbial Genomes (IMG) website. Introduced  
603 contig breaks are documented in **Table S2** and **Fig. S6**. GenVision software (DNASTar, Madison,  
604 WI) was used to visualize and label selected functions in the pan-genome assembly and also  
605 display RNAseq data as a function of shared and unique PULs.

606

## 607 **RNAseq analysis**

608 For RNAseq, *B. xylanisolvans* and *B. ovatus* cells were grown to mid-exponential phase  
609 on either purified mucin *O*-linked glycans (purified in house from Sigma Type III porcine gastric  
610 mucin) or glucose as a reference as previously described (22). Total RNA was extracted using an  
611 RNeasy kit (Qiagen), treated with Turbo DNase I (Ambion), and mRNA was enriched using the  
612 Bacterial Ribo-Zero rRNA removal kit (Epicentre). Residual mRNA was converted to

613 sequencing libraries using TruSeq barcoded adaptors (Illumina) and sequenced at the University  
614 of Michigan Sequencing Core in an Illumina HiSeq instrument with 24 samples multiplexed per  
615 lane. Bar-coded data were demultiplexed and analyzed using the Arraystar software package  
616 with Qseq (DNASTar). All RNAseq data are publicly available from the National Institutes of  
617 Health Gene Expression Omnibus Database under accession numbers GSM4714867-  
618 GSM4714890.

619

### 620 **Core gene determination and detection of LGT events between *Bo* and *Bx* strains**

621 The core gene alignment was generated with cognac (51). The alignment was then  
622 partitioned into the individual component genes and approximate maximum likelihood gene trees  
623 were generated with fastTree (52). Co-phylogenetic distances were calculated with APE (53). A  
624 distance threshold of greater than 0.1 to the same species and less than 0.1 to the opposite species  
625 was used to identify alleles bearing signatures of HGT. All analyses were performed in R  
626 (version 3.6.3) (54). All code developed for this project are available at  
627 [https://github.com/rdcrawford/bacteroides\\_hgt](https://github.com/rdcrawford/bacteroides_hgt).

### 628 **Acknowledgements**

629 This work is dedicated to the memory of Dr. Cherie Ziemer. We thank Thomas Schmidt  
630 (University of Michigan) for helpful advice on developing the phenotype clustering score. We  
631 thank Abigail Salyers (University of Illinois, Urbana-Champaign) who kindly provided a large  
632 portion of the strains used in this work. Additional support with strain culture and resources was  
633 provided by Nadja Shoemaker (University of Illinois, Urbana-Champaign), Emma Allen-Vercoe  
634 (University of Guelph), Laurie Comstock (Harvard University), Jin-Woo Bae (Kyung-Hee  
635 University, Korea), Tomomi Kuwahara (Kagawa University, Japan) and Jeffrey Gordon

636 (Washington University). This work was supported by funds from the U.S. National Institutes of  
637 Health (DK084214, DK118024, DK125445), the University of Michigan Biological Sciences  
638 Scholars Program and pilot/feasibility grants from the University of Michigan Center for  
639 Gastrointestinal Research (NIDDK DK034933).

640 **Competing Interests:** The authors declare no competing interests.

641

## 642 **Figure legends**

643 **Figure 1. Glycan degradation abilities among gut Bacteroidetes.** (A.) The number of species  
644 out of 29 tested that degrade each polysaccharide is listed in order of decreasing degradation  
645 frequency from left to right. Since not all strains within a given species necessarily have the  
646 metabolic potential to utilize each polysaccharide, colors illustrate the percentage of strains  
647 within each degrading species that possess the indicated ability. (B.) The number of  
648 polysaccharides that a given species degrades in decreasing order. The number of strains tested  
649 for each species is listed in parentheses and colors represent the percentage of strains in each  
650 indicated species that degrade each glycan counted towards the total.

651

652 **Figure 2. Heat map of individual polysaccharide utilization traits.** Species are clustered by  
653 glycan utilization phenotype based on normalized total growth level (**Fig. S4B**). The magnitude  
654 of growth is indicated by the heatmap scale at the bottom right. Columns at the left indicate the  
655 source (human, animal) and time period of isolation. The cladogram at the far left shows the  
656 results of unsupervised clustering of the data based the normalized growth data shown. The

657 species designations at the right are the results of 16S rRNA gene sequencing (>98% identity to  
658 the species type strain was used to assign species). All raw and normalized growth and rate data  
659 for individual strains may be found in **Table S1** see **Fig. S3** for an expanded heatmap with  
660 monosaccharide data and individual strain names labels.

661  
662 **Figure 3. Host mucin O-glycan metabolism within the *Bacteroides*.** (A.) A phylogenetic tree  
663 based on housekeeping genes that compares mucin O-glycan utilization across species. The  
664 diameter of the black circles represents the number of strains tested within each species (sample  
665 depth), whereas the size of the overlaid red circle corresponds to the number of strains exhibiting  
666 O-glycan metabolism. Note that some species have either full or no penetrance of this  
667 phenotypic trait yet others like *B. ovatus*/*B. xylanisolvans* have more extensive variability among  
668 strains. (B.) Strains of *B. ovatus* (blue) and *B. xylanisolvans* (green) that show variable growth  
669 abilities on mucin O-glycan (n=2 growth assays per bar, error bars are range between values).  
670 Gray histogram bars are total growth controls on an aggregate of the monosaccharides that all  
671 strains of these two species grow on (**Table S1**) and are provided as a reference for overall  
672 growth ability on a non O-glycan substrate. Data from two established O-glycan degraders, *B.*  
673 *massiliensis* and *B. thetaiotaomicron*, are also shown for reference. Species with black arrows  
674 were used for pangenome analyses to compare genetic traits associated with mucin O-glycan  
675 metabolism. We performed RNA-seq on three strains included in this pangenome analyses  
676 (black boxes) positive for O-glycan utilization and an additional strain, *B. ovatus* NLAE-zl-H59  
677 (red arrow, box), to see if there were unique genes/PULs present in strains that have the ability to  
678 grow on mucin O-glycans.

679

680 **Figure 4. Distribution of all genes as well as core polysaccharide utilization functions in the**  
681 ***Bo/Bx* pangenome. (A.)** The left panel shows the number of core genes (*i.e.*, those present in all  
682 seven strains used for pangenome construction) compared to genes present in 2-7 of the  
683 individual strains. The right panel shows the same distribution of genes assigned to PULs or  
684 particular degradative CAZyme families (GH, PL, CE, see **Tables S2** and **S3** for more detailed  
685 assignments. **(B.)** The distribution of genes between mucin-degrading (n=3) and non-degrading  
686 (n=4) strains used to construct the pangenome. Top numbers indicate total genes, while numbers  
687 in parentheses indicate the number of PULs (not individual PUL genes) in each category. **(C.)**  
688 Distribution of the genes that are unique to the three mucin-degrading strains within each  
689 genome. Genes/PULs are numbered as described for B. Note that no PULs are shared by all three  
690 strains.

691 **Figure 5. (A.)** A higher-resolution view of a region of the *Bo/Bx* pangenome shows the variable  
692 presence of at least six different PULs occurring between three genomic nodes (nodes 33-35 in  
693 this quarter of the total pangenome. Segment 2 of the physical pangenome map was selected  
694 because the first segment initiated with numerous small contigs and this segment contained  
695 previously validated genes for xyloglucan metabolism (49). Node genes are colored red, while  
696 *susC*-like and *susD*-like genes are colored purple and orange, respectively, and glycoside  
697 hydrolase genes in light blue. GH family numbers are given below select PULs starting from the  
698 top to indicate potential specificity and new numbers are only added going down the schematic if  
699 the family assignments are different, indicating a different PUL. A well-studied *B. ovatus* PUL  
700 for xyloglucan degradation (49) is shown in the center and occurs variably between two nodes  
701 and also has variable gene content. The two bottom genomes are from different species,  
702 *Bacteroides finegoldii* (*Bfin*) and *Bacteroides fragilis* (*Bfra*) and show less complex genome

703 architecture with the *Bfra* region possessing no PULs. **(B.)** A broader view of the genome region  
704 shown in A. showing that the same mosaic pattern is common across the pangenome. Only PULs  
705 are illustrated, although many other genes were also variable in these regions. The numbers at  
706 the bottom delineate the presence of 35 different core gene nodes (as in A. some nodes contain  
707 multiple core genes) in this section of the genome and the presence of homologous or unique  
708 PULs is illustrated according to the color code at right (see **Fig. S6** for high resolution physical  
709 maps of the pan-genome with PUL annotations). Note that in some cases up to five different  
710 PULs were located at one location **(C.)** A schematic showing the proposed mechanism of  
711 genome exchange based on previous studies (42-44) and observations presented here. Genomic  
712 ICEs that are either partially active (excision deficient, but capable of initiating DNA strand  
713 breakage and conjugation) or activated *in trans* by the presence of an exogenous conjugative  
714 transposon, initiate genome mobilization from a donor into a recipient. If sufficient homology  
715 between node genes exists in the recipient, homologous recombination between two nodes can  
716 replace a section of the recipient with a segment from the donor. Note that genomic regions are  
717 shown as linear fragments for simplicity, but would be circular.

718 **Figure 6. (A.)** Schematic of the workflow to identify putative LGT core genes: align genes and  
719 build corresponding trees for each core gene, determine the median substitution distances  
720 distances for each allele of a core gene in a given strain to both species, and identify loci with  
721 an identical conserved structure between isolates of opposite species. **(B.)** Plot of median  
722 distances for all core genes identified in the 33 genomes analyzed. The boxes show the regions  
723 containing genes for which the median distance was  $\geq 0.1$  to the assigned species for a given  
724 strain and  $\leq 0.1$  for the opposite species to which a strain is assigned. These genes were  
725 determined to be high-confidence examples of core/node genes that had been replaced by an

726 allele from the other species. (C.) A region of the *Bo/Bx* pangenome that contains a PUL  
727 involved in galactomannan (GalM) and glucomannan (GluM) degradation. This PUL is present  
728 in six strains of *Bx* and two strains of *Bo* and in the latter cases flanking node genes exhibit  
729 signatures of being derived from LGT with a *Bx* donor (the yellow box highlights potential  
730 recombination region). The columns at the left indicate the growth of each strain on GalM or  
731 GluM. The ability to grow on GalM is fully correlated with the presence of one of two different  
732 PULs, or both, that are transcriptionally activated during growth on this substrate (**Fig. S9**) (23).  
733 Notably, some strains (red “+”) are able to grow weakly on GluM but do not possess either of the  
734 identified PULs, suggesting that additional, partially orthologous PULs exist that confer the  
735 ability to use only GluM.

736

### 737 **Supplementary Figure and Table Legends**

738 **Figure S1.** Schematics of the polysaccharides used in this study with sugar composition and  
739 linkages schematized according to the “Symbol nomenclature for glycans” standard format and  
740 based on the symbol key provided at the right. Linkages are labeled as  $\alpha$  or  $\beta$  and the number  
741 provided represents the carbon position in the recipient sugar. The carbon in the donor sugar is  
742 carbon-1 in all cases except N-acetyl neuraminic acid and is not shown. Note that pectic galactan  
743 (potato and lupin), xylan (oat spelt and wheat arabinoxylan) and amylopectin (potato and maize)  
744 can have variable structures based on plant source. Abbreviations for several polysaccharides are  
745 provided in parentheses and used throughout the text and figures.



746 **Figure S2. Correlation of replicate growth and rate measurements.** Two replicate  
747 measurements were made for each of the two parameters recorded, total growth (**A.**) and growth  
748 rate (**B.**) for each species on each carbohydrate substrate. Data points are color-coded based on  
749 whether the two replicates exhibited variation between 0-5% (black), 5-10% (blue), 10-20%  
750 (green), >20% (orange) or growth in one assay and no growth in the other (red). (**C.**) A linear  
751 function was fitted (with red points omitted) to calculate an  $r^2$  value for the data set associated  
752 with utilization of each individual substrate. Measurements on some substrates were more  
753 variable than on others due, at least in part, to the tendency of these substrates to partially  
754 precipitate or retrograde during growth, which yielded variable levels of background absorbance.

755 **Figure S3.** A heatmap identical to the one shown in **Fig. 2** main text, except that  
756 monosaccharide growth data is included. Strain names are also noted at the far right (best viewed  
757 in electronic PDF form with magnification) and animal strains are labeled in red font.

758 **Figure S4. (A.)** A scheme for evaluating which aspects of growth phenotype data are most  
759 influential for clustering strains that belong to the same species using hypothetical *B. theta* data  
760 as an illustrative example. A quantitative index was used in which the number of strains tested is  
761 divided by the minimum number of branches needed to encompass all of the strains for that  
762 species, with a perfect score being “1” (e.g., eight *B. theta* strains divided by the minimum of  
763 eight branches needed to encompass all strains in the top example). (**B.**) Actual clustering index  
764 data for the raw and normalized growth and rate data gathered for 354 different Bacteroidetes  
765 strains. M and P stand for “monosaccharide” and “polysaccharide” growth, respectively. One of  
766 the two most optimal conditions, which incorporates normalized growth data on polysaccharides  
767 only, was used to construct **Figs. 2** and **S3**.

768 **Figure S5.** A Pearson correlation plot to determine if individual growth abilities co-occur in the  
769 same strains. Positive or negative correlations that are  $\geq 0.40$  are shown in the colors indicated.

770 **Figure S6.** High-resolution maps of the entire reconstructed pangenome. These maps are  
771 provided in four separate parts due to their large size (labeled as **Fig. S6a, b, c, d**) and  
772 correspond to the data table provided in **Table S2**. Note that a 5<sup>th</sup> file is provided with  
773 information about the gene, locus and strand breaking legend data.

774 **Figure S7.** Circular pangenome and corresponding mucin *O*-glycan transcriptomics from *Bx*  
775 D22, *Bo* 3\_1\_23 and *Bo* D2 .

776 **Figure S8.** Individual maps of high-confidence inter-genomic exchange events between *Bo* and  
777 *Bx* strains.

778 **Figure S9. (A.)** Schematics of PUL-A and PUL-B associated with GalM and GlcM utilization.  
779 In *Bo* ATCC8384, elimination of PUL-A eliminates both of these growth abilities. **(B.)**  
780 Expression analysis by qPCR of two sentinel genes from PUL-B in *Bo* strain D2 that lacks PUL-  
781 A but still exhibits robust growth on GalM.

782 **Table S1.** Strain designations, growth levels, growth rates, host species, isolation periods,  
783 growth media, 16S rRNA similarities and, if applicable, public genome sequence references for  
784 all Bacteroidetes strains used in this study.

785

786 **Table S2.** Data table of the reconstructed pangenome of seven *Bo/Bx* strains. Additional notes  
787 are provided directly on the table.

788

789 **Table S3.** PULs that were delineated in the seven strain pangenome with annotations based on  
790 whether they were unique to mucin non-degrading strains, unique to mucin-degraders or shared  
791 between strains in both categories. Additional notes are provided directly on the table.

792

793 **Table S4.** Gene expression changes detected using whole-genome transcriptional profiling by  
794 RNA-seq of *B. xylanisolvens* D22 grown on mucin *O*-glycan as a sole carbon source compared  
795 to glucose reference. Additional notes are provided directly on the table.

796

797 **Table S5.** Gene expression changes detected using whole-genome transcriptional profiling by  
798 RNA-seq of *B. ovatus* 3-1-23 grown on mucin *O*-glycan as a sole carbon source compared to  
799 glucose reference. Additional notes are provided directly on the table.

800

801 **Table S6.** Gene expression changes detected using whole-genome transcriptional profiling by  
802 RNA-seq of *B. ovatus* D2 grown on mucin *O*-glycan as a sole carbon source compared to  
803 glucose reference. Additional notes are provided directly on the table.

804

805 **Table S7.** Gene expression changes detected using whole-genome transcriptional profiling by  
806 RNA-seq of *B. ovatus* NLAE-zl-H59 grown on mucin *O*-glycan as a sole carbon source  
807 compared to glucose reference. Additional notes are provided directly on the table.

808

809 **Table S8.** Liquid media recipes (sheet **A**) and components (sheet **B**) for growing the  
810 Bacteroidetes used in this study.

811

812 **Table S9.** Mono- and polysaccharides used in the phenotypic growth arrays and corresponding  
813 supplier or purification details.

814

## 815   **References**

- 816    1. Koropatkin NM, Cameron EA, Martens EC. How glycan metabolism shapes the human gut  
817    microbiota. *Nat Rev Microbiol.* 2012; 10: 323-35.  
818
- 819    2. Flint HJ, Scott KP, Duncan SH, Louis P, Forano E. Microbial degradation of complex  
820    carbohydrates in the gut. *Gut microbes.* 2012; 3:289-306.  
821
- 822    3. Porter NT, Martens EC. The Critical Roles of Polysaccharides in Gut Microbial Ecology  
823    and Physiology. *Annual review of microbiology.* 2017; 71: 349-69.  
824
- 825    4. El Kaoutari A, Armougom F, Gordon JI, Raoult D, Henrissat B. The abundance and variety  
826    of carbohydrate-active enzymes in the human gut microbiota. *Nature reviews Microbiology.*  
827    2013; 11: 497-504.  
828
- 829    5. McNeil NI. The contribution of the large intestine to energy supplies in man. *The*  
830    *American journal of clinical nutrition.* 1984; 39: 338-42.  
831
- 832    6. Desai MS, Seekatz AM, Koropatkin NM, Kamada N, Hickey CA, Wolter M, et al. A Dietary  
833    Fiber-Deprived Gut Microbiota Degrades the Colonic Mucus Barrier and Enhances  
834    Pathogen Susceptibility. *Cell.* 2016; 167: 1339-53.  
835
- 836    7. Sonnenburg ED, Smits SA, Tikhonov M, Higginbottom SK, Wingreen NS, Sonnenburg JL.  
837    Diet-induced extinctions in the gut microbiota compound over generations. *Nature.* 2016;  
838    529: 212-5.  
839
- 840    8. Sonnenburg ED, Sonnenburg JL. Starving our microbial self: the deleterious  
841    consequences of a diet deficient in microbiota-accessible carbohydrates. *Cell metabolism.*  
842    2014; 20: 779-86.  
843
- 844    9. Wrzosek L, Miquel S, Noordine ML, Bouet S, Joncquel Chevalier-Curt M, Robert V, et al.  
845    *Bacteroides thetaiotaomicron* and *Faecalibacterium prausnitzii* influence the production of  
846    mucus glycans and the development of goblet cells in the colonic epithelium of a  
847    gnotobiotic model rodent. *BMC Biol.* 2013; 11: 61.  
848
- 849    10. Ganapathy V, Thangaraju M, Prasad PD, Martin PM, Singh N. Transporters and  
850    receptors for short-chain fatty acids as the molecular link between colonic bacteria and the  
851    host. *Current opinion in pharmacology.* 2013; 13: 869-74.  
852
- 853    11. Cook SI, Sellin JH. Review article: short chain fatty acids in health and disease. *Aliment*  
854    *Pharmacol Ther.* 1998; 12: 499-507.  
855
- 856    12. Smith PM, Howitt MR, Panikov N, Michaud M, Gallini CA, Bohlooly YM, et al. The  
857    microbial metabolites, short-chain fatty acids, regulate colonic Treg cell homeostasis.  
858    *Science.* 2013; 341: 569-73.

- 859 13. Kim M, Qie Y, Park J, Kim CH. Gut Microbial Metabolites Fuel Host Antibody Responses.  
860 *Cell Host Microbe*. 2016; 20: 202-14.  
861
- 862 14. Xu J, Mahowald MA, Ley RE, Lozupone CA, Hamady M, Martens EC, et al. Evolution of  
863 Symbiotic Bacteria in the Distal Human Intestine. *Plos Biol*. 2007; 5: e156.  
864
- 865 15. Cantarel BL, Coutinho PM, Rancurel C, Bernard T, Lombard V, Henrissat B. The  
866 Carbohydrate-Active EnZymes database (CAZy): an expert resource for Glycogenomics.  
867 *Nucleic acids research*. 2009; 37: D233-D8.  
868
- 869 16. McNulty NP, Wu M, Erickson AR, Pan C, Erickson BK, Martens EC, et al. Effects of diet  
870 on resource utilization by a model human gut microbiota containing *Bacteroides*  
871 *cellulosilyticus* WH2, a symbiont with an extensive glyco biome. *Plos Biol*. 2013; 11:  
872 e1001637.  
873
- 874 17. Salyers AA, Vercellotti JR, West SE, Wilkins TD. Fermentation of mucin and plant  
875 polysaccharides by strains of *Bacteroides* from the human colon. *Appl Environ Microbiol*.  
876 1977; 33: 319-22.  
877
- 878 18. Salyers AA, West SE, Vercellotti JR, Wilkins TD. Fermentation of mucins and plant  
879 polysaccharides by anaerobic bacteria from the human colon. *Appl Environ Microbiol*. 1977;  
880 34: 529-33.  
881
- 882 19. Qin J, Li R, Raes J, Arumugam M, Burgdorf KS, Manichanh C, et al. A human gut  
883 microbial gene catalogue established by metagenomic sequencing. *Nature*. 2010; 464: 59-  
884 65.  
885
- 886 20. Ley RE, Hamady M, Lozupone C, Turnbaugh PJ, Ramey RR, Bircher JS, et al. Evolution of  
887 mammals and their gut microbes. *Science*. 2008; 320: 1647-51.  
888
- 889 21. Eckburg PB, Bik EM, Bernstein CN, Purdom E, Dethlefsen L, Sargent M, et al. Diversity  
890 of the human intestinal microbial flora. *Science*. 2005; 308: 1635-8.  
891
- 892 22. Martens EC, Chiang HC, Gordon JI. Mucosal Glycan Foraging Enhances Fitness and  
893 Transmission of a Saccharolytic Human Gut Bacterial Symbiont. *Cell Host Microbe*. 2008; 4:  
894 447-57.  
895
- 896 23. Martens EC, Lowe EC, Chiang H, Pudlo NA, Wu M, McNulty NP, et al. Recognition and  
897 Degradation of Plant Cell Wall Polysaccharides by Two Human Gut Symbionts. *Plos Biol*.  
898 2011; 9: e1001221.  
899
- 900 24. Bloom SM, Bijanki VN, Nava GM, Sun L, Malvin NP, Donermeyer DL, et al. Commensal  
901 *Bacteroides* species induce colitis in host-genotype-specific fashion in a mouse model of  
902 inflammatory bowel disease. *Cell Host Microbe*. 2011; 9: 390-403.

- 903 25. Hickey CA, Kuhn KA, Donermeyer DL, Porter NT, Jin C, Cameron EA, et al. Colitogenic  
904 *Bacteroides thetaiotaomicron* Antigens Access Host Immune Cells in a Sulfatase-Dependent  
905 Manner via Outer Membrane Vesicles. *Cell Host Microbe*. 2015; 17: 672-80.  
906
- 907 26. Mazmanian SK, Round JL, Kasper DL. A microbial symbiosis factor prevents intestinal  
908 inflammatory disease. *Nature*. 2008; 453: 620-5.  
909
- 910 27. Lagkouvardos I, Pukall R, Abt B, Foesel BU, Meier-Kolthoff JP, Kumar N, et al. The  
911 Mouse Intestinal Bacterial Collection (miBC) provides host-specific insight into cultured  
912 diversity and functional potential of the gut microbiota. *Nat Microbiol*. 2016; 1: 16131.  
913
- 914 28. Browne HP, Forster SC, Anonye BO, Kumar N, Neville BA, Stares MD, et al. Culturing of  
915 'unculturable' human microbiota reveals novel taxa and extensive sporulation. *Nature*.  
916 2016; 533: 543-6.  
917
- 918 29. Lagier JC, Khelaifia S, Alou MT, Ndongo S, Dione N, Hugon P, et al. Culture of previously  
919 uncultured members of the human gut microbiota by culturomics. *Nat Microbiol*. 2016; 1:  
920 16203.  
921
- 922 30. Tramontano M, Andrejev S, Pruteanu M, Klunemann M, Kuhn M, Galardini M, et al.  
923 Nutritional preferences of human gut bacteria reveal their metabolic idiosyncrasies. *Nat*  
924 *Microbiol*. 2018; 3: 514-22.  
925
- 926 31. Hehemann JH, Kelly AG, Pudlo NA, Martens EC, Boraston AB. Bacteria of the human gut  
927 microbiome catabolize red seaweed glycans with carbohydrate-active enzyme updates  
928 from extrinsic microbes. *Proceedings of the National Academy of Sciences of the United*  
929 *States of America*. 2012; 109: 19786-91.  
930
- 931 32. Tamura K, Hemsworth GR, Dejean G, Rogers TE, Pudlo NA, Urs K, et al. Molecular  
932 mechanism by which prominent human gut Bacteroidetes utilize mixed-linkage  $\beta$ -glucans,  
933 major health-promoting cereal polysaccharides. *Cell Reports*. 2017; 21: 417-430.  
934
- 935 33. Shipman JA, Berleman JE, Salyers AA. Characterization of four outer membrane  
936 proteins involved in binding starch to the cell surface of *Bacteroides thetaiotaomicron*. *J*  
937 *Bacteriol*. 2000; 182: 5365-72.  
938
- 939 34. Déjean G, Tamura K, Cabrera A, Jain N, Pudlo N, Holm Viborg A, et al. Synergy between  
940 cell-surface glycosidases and glycan-binding proteins dictates the utilization of specific  
941 beta(1,3)-glucans by human gut *Bacteroides*. *mBio*. 2020; 11: e00095-20.  
942
- 943 35. Pudlo NA, Urs K, Kumar SS, German JB, Mills DA, Martens EC. Symbiotic Human Gut  
944 Bacteria with Variable Metabolic Priorities for Host Mucosal Glycans. *mBio*. 2015; 6:  
945 e01282-15.  
946

- 947 36. Despres J, Forano E, Lepercq P, Comtet-Marre S, Jubelin G, Chambon C, et al. Xylan  
948 degradation by the human gut *Bacteroides xylanisolvens* XB1A(T) involves two distinct gene  
949 clusters that are linked at the transcriptional level. *BMC genomics*. 2016; 17: 326.  
950
- 951 37. Sonnenburg ED, Zheng H, Joglekar P, Higginbottom SK, Firkbank SJ, Bolam DN, et al.  
952 Specificity of polysaccharide use in intestinal *Bacteroides* species determines diet-induced  
953 microbiota alterations. *Cell*. 2010; 141: 1241-52.  
954
- 955 38. Terrapon N, Lombard V, Drula E, Lapebie P, Al-Masaudi S, Gilbert HJ, et al. PULDB: the  
956 expanded database of Polysaccharide Utilization Loci. *Nucleic Acids Res*. 2018; 46:D677-  
957 D83.  
958
- 959 39. Johansson ME, Holmen Larsson JM, Hansson GC. Microbes and Health Sackler  
960 Colloquium: The two mucus layers of colon are organized by the MUC2 mucin, whereas the  
961 outer layer is a legislator of host-microbial interactions. *Proceedings of the National  
962 Academy of Sciences of the United States of America*. 2011; 108 Suppl 1: 4659-65.  
963
- 964 40. Pudlo NA, Vasconcelos-Pereira G, Parnami J, Cid M, Markert S, Tingley JP, et al.  
965 Extensive transfer of genes for edible seaweed digestion from marine to human gut  
966 bacteria. *Preprint*. 2021; BIORXIV/2020/142968.  
967
- 968 41. Martens EC, Kelly AG, Tauzin AS, Brumer H. The devil lies in the details: how variations  
969 in polysaccharide fine-structure impact the physiology and evolution of gut microbes.  
970 *Journal of molecular biology*. 2014; 426: 3851-65.  
971
- 972 42. Moon K, Sonnenburg J, Salyers AA. Unexpected effect of a *Bacteroides* conjugative  
973 transposon, CTnDOT, on chromosomal gene expression in its bacterial host. *Mol Microbiol*.  
974 2007; 64: 1562-71.  
975
- 976 43. Husain F, Tang K, Veeranagouda Y, Boente R, Patrick S, Blakely G, et al. Novel large-  
977 scale chromosomal transfer in *Bacteroides fragilis* contributes to its pan-genome and rapid  
978 environmental adaptation. *Microb Genom*. 2017; 3:e000136.  
979
- 980 44. Whittle G, Hamburger N, Shoemaker NB, Salyers AA. A *Bacteroides* conjugative  
981 transposon, CTnERL, can transfer a portion of itself by conjugation without excising from  
982 the chromosome. *J Bacteriol*. 2006; 188: 1169-74.  
983
- 984 45. Reddy SK, Bagenholm V, Pudlo NA, Bouraoui H, Koropatkin NM, Martens EC, et al. A  
985 beta-mannan utilization locus in *Bacteroides ovatus* involves a GH36 alpha-galactosidase  
986 active on galactomannans. *FEBS Lett*. 2016; 590: 2106-18.  
987
- 988 46. Schloss PD, Westcott SL, Ryabin T, Hall JR, Hartmann M, Hollister EB, et al. Introducing  
989 mothur: open-source, platform-independent, community-supported software for  
990 describing and comparing microbial communities. *Appl Environ Microbiol*. 2009; 75: 7537-  
991 41.



- 992 47. Altschul SF, Gish W, Miller W, Myers EW, Lipman DJ. Basic Local Alignment Search  
993 Tool. *J Mol Biol.* 1990; 215: 403-10.  
994
- 995 48. Holdeman LV, Cato ED, Moore WEC. Anaerobe Laboratory Manual. Moore WEC, editor.  
996 Blacksburg, Va.: Virginia Polytechnic Institute and State University Anaerobe Laboratory;  
997 1977.  
998
- 999 49. Larsbrink J, Rogers TE, Hemsworth GR, McKee LS, Tauzin AS, Spadiut O, et al. A  
1000 discrete genetic locus confers xyloglucan metabolism in select human gut Bacteroidetes.  
1001 *Nature.* 2014;506(7489):498-502.  
1002
- 1003 50. Darling AC, Mau B, Blattner FR, Perna NT. Mauve: multiple alignment of conserved  
1004 genomic sequence with rearrangements. *Genome Res.* 2004; 14: 1394-403.  
1005
- 1006 51. Crawford RD, Snitkin ES. cognac: rapid generation of concatenated gene alignments for  
1007 phylogenetic inference from large, bacterial whole genome sequencing datasets. *BMC*  
1008 *Bioinformatics.* 2021; 22: 70.  
1009
- 1010 52. Price MN, Dehal PS, Arkin AP. FastTree: computing large minimum evolution trees with  
1011 profiles instead of a distance matrix. *Mol Biol Evol.* 2009; 26: 1641-50.  
1012
- 1013 53. Popescu AA, Huber KT, Paradis E. ape 3.0: New tools for distance-based phylogenetics  
1014 and evolutionary analysis in R. *Bioinformatics.* 2012; 28: 1536-7.  
1015
- 1016 54. R Core Team. R: A language and environment for statistical computing. R Foundation  
1017 for Statistical Computing, Vienna, Austria. 2017; URL <https://www.R-project.org/>.  
1018
- 1019
- 1020

Figure 1

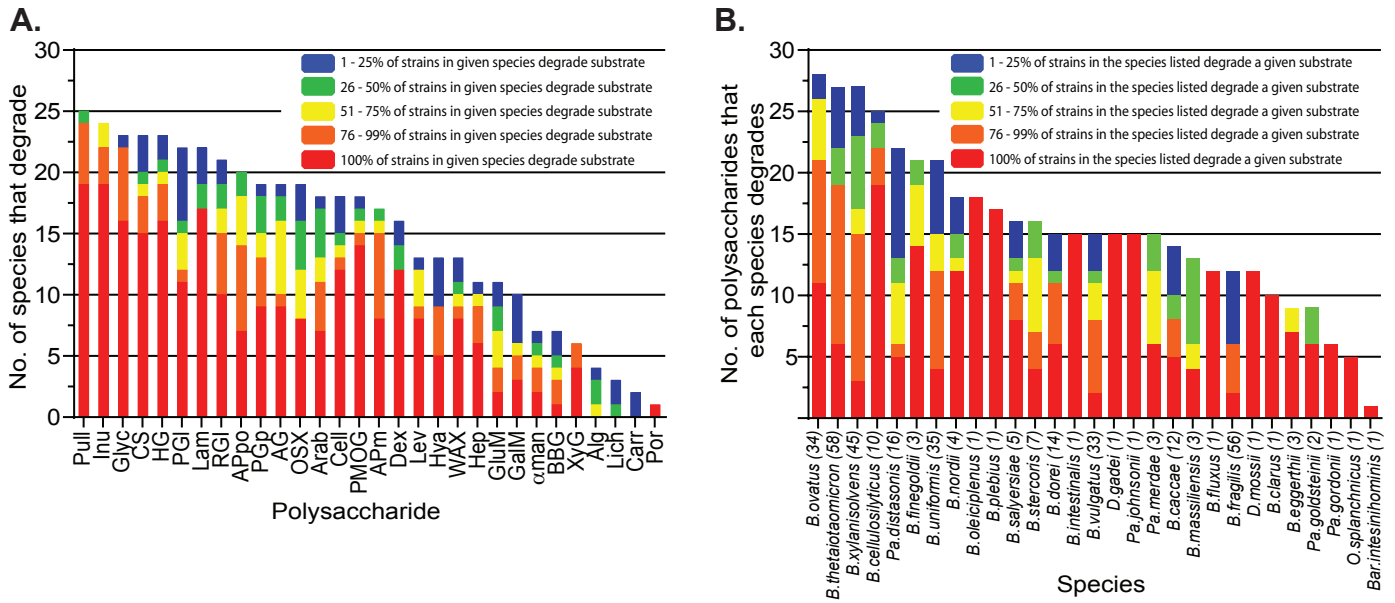

Figure 2

bioRxiv preprint doi: <https://doi.org/10.1101/2021.07.15.452266>; this version posted July 15, 2021. The copyright holder for this preprint (which was not certified by peer review) is the author/funder, who has granted bioRxiv a license to display the preprint in perpetuity. It is made available under aCC-BY-NC 4.0 International license.

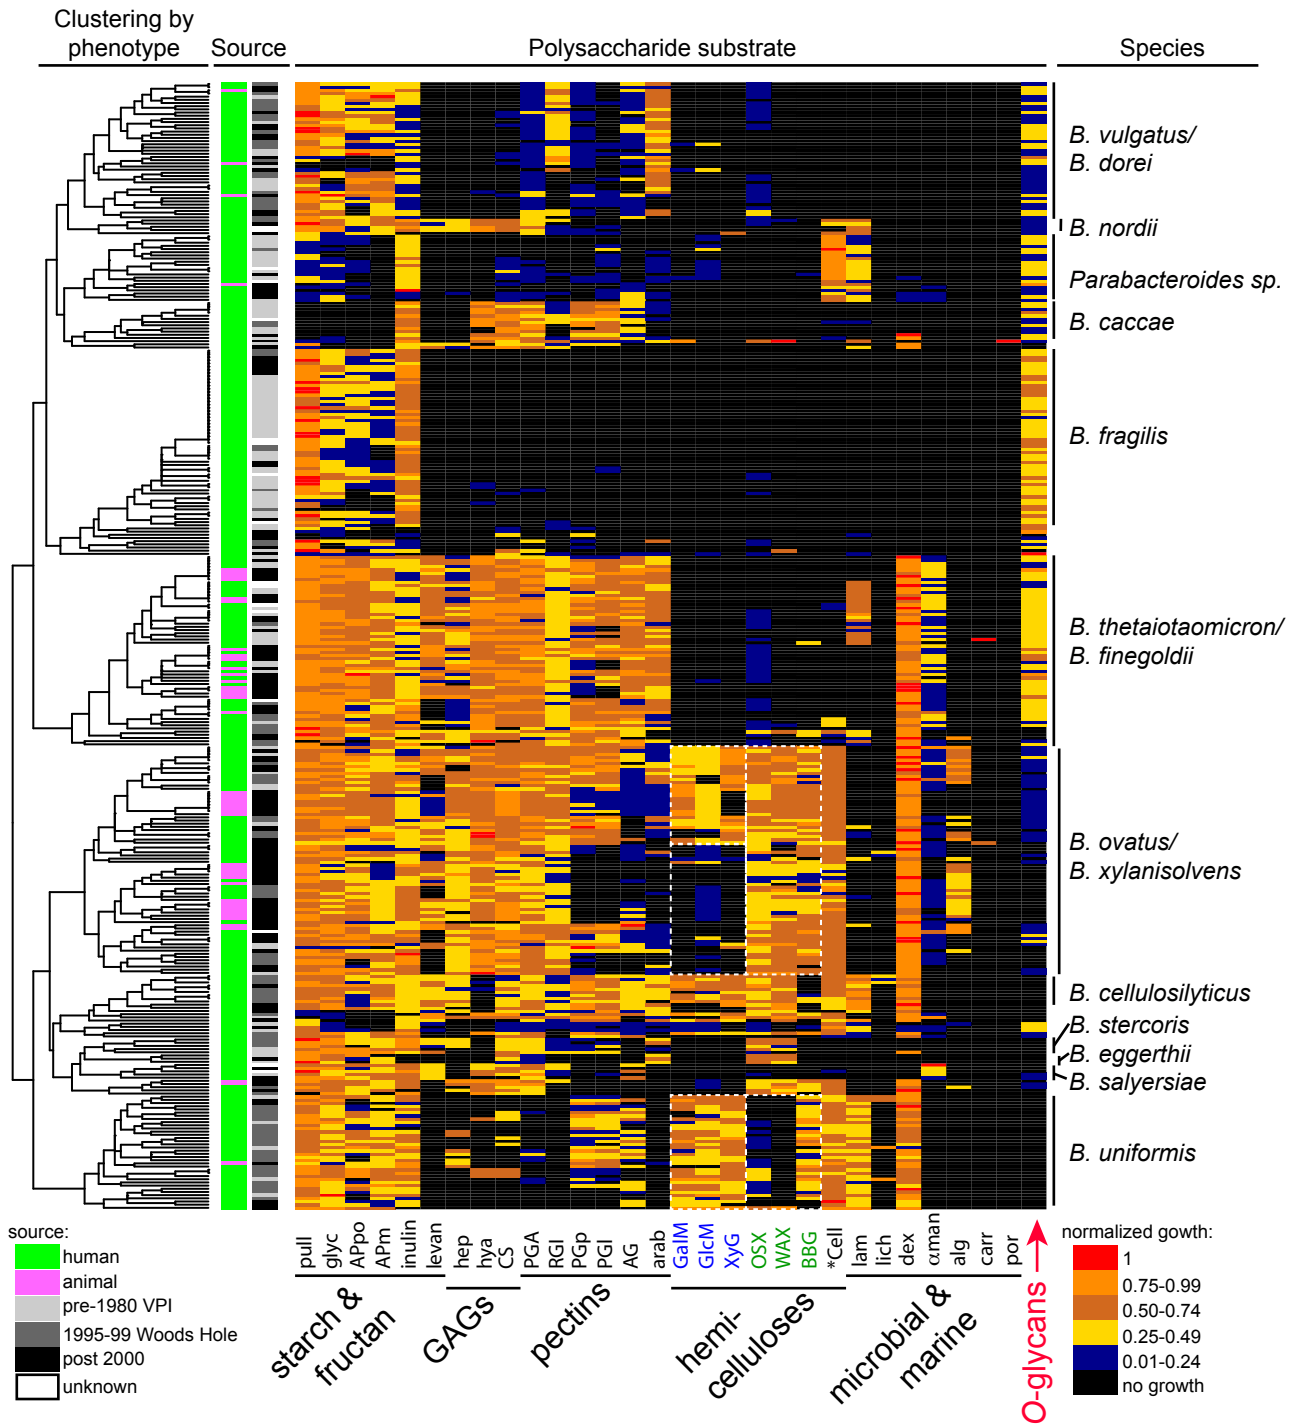

Figure 3

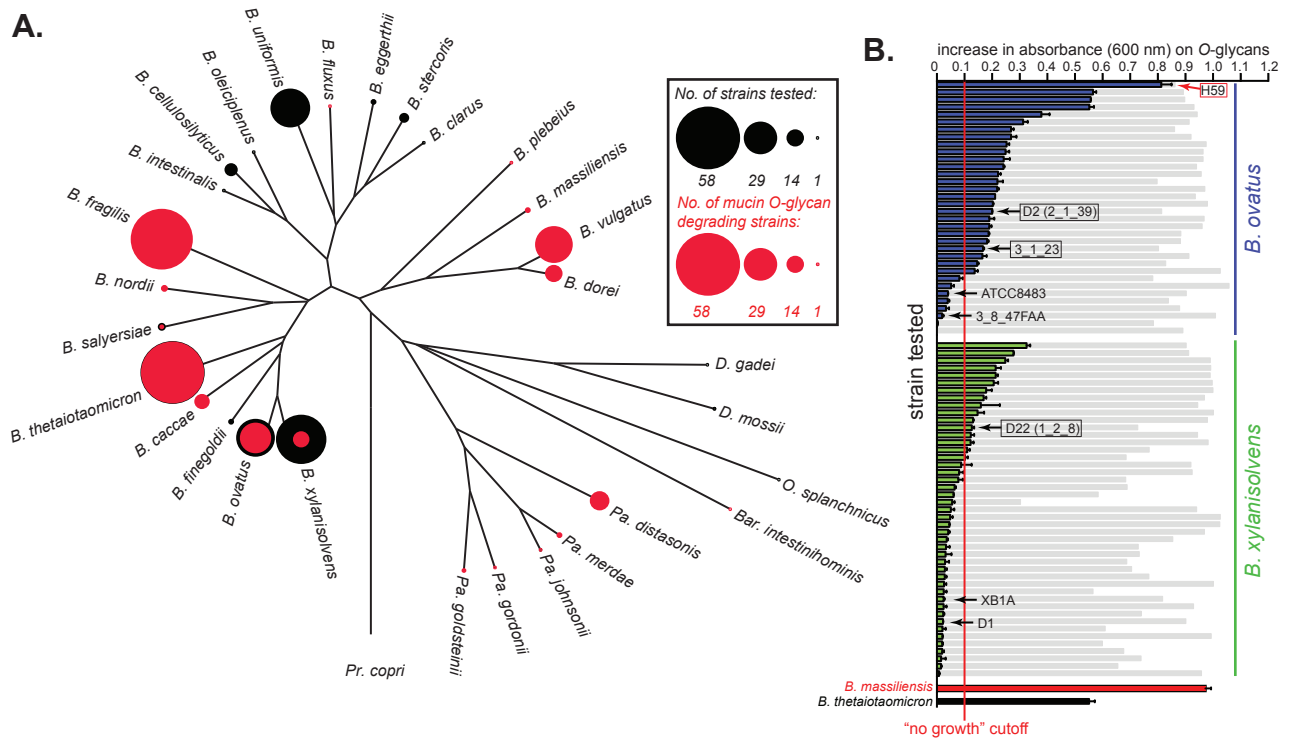

Figure 4

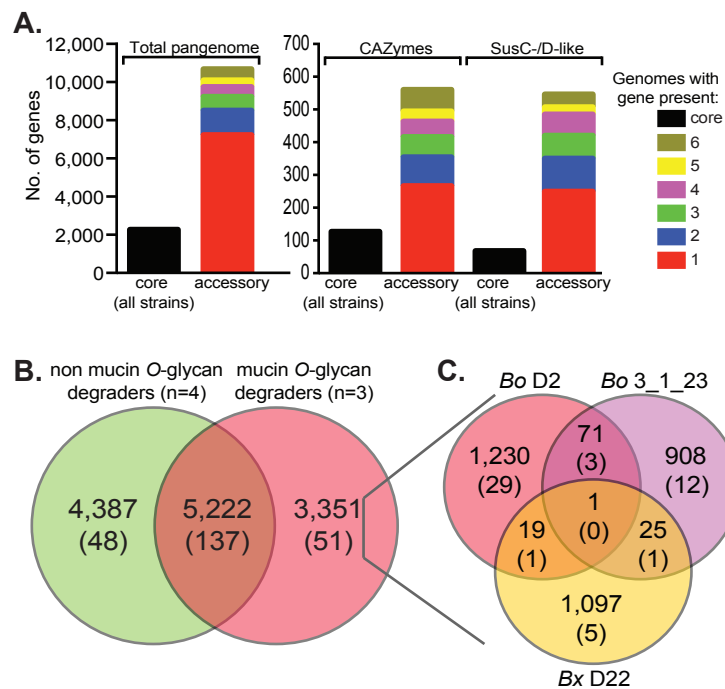

## Figure 5

**A.**

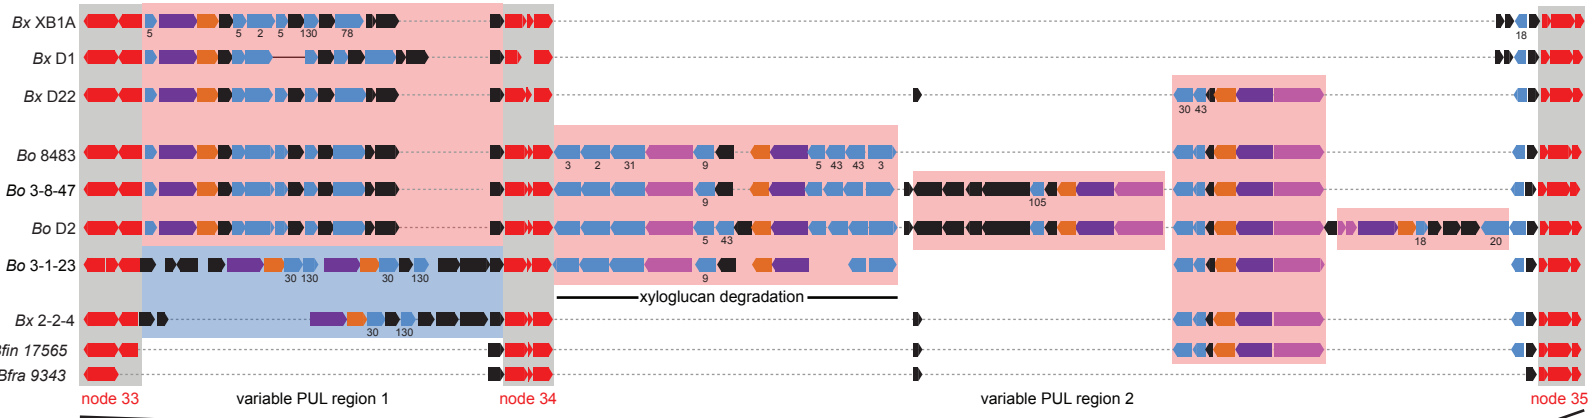

**B.**

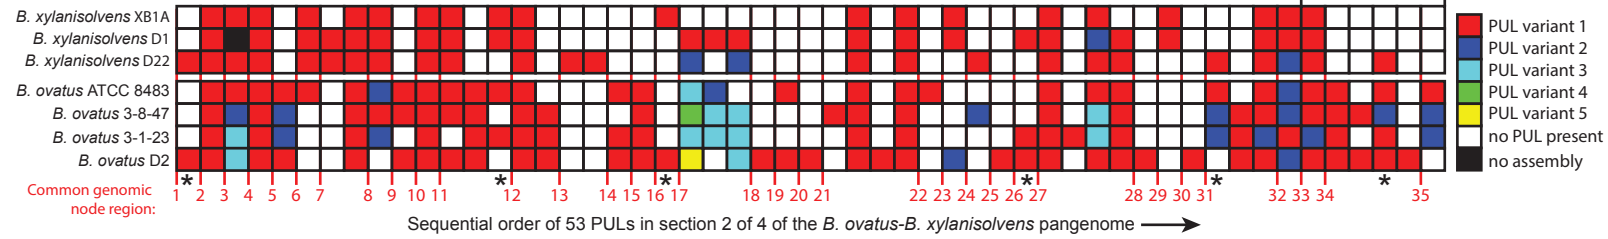

**C.**

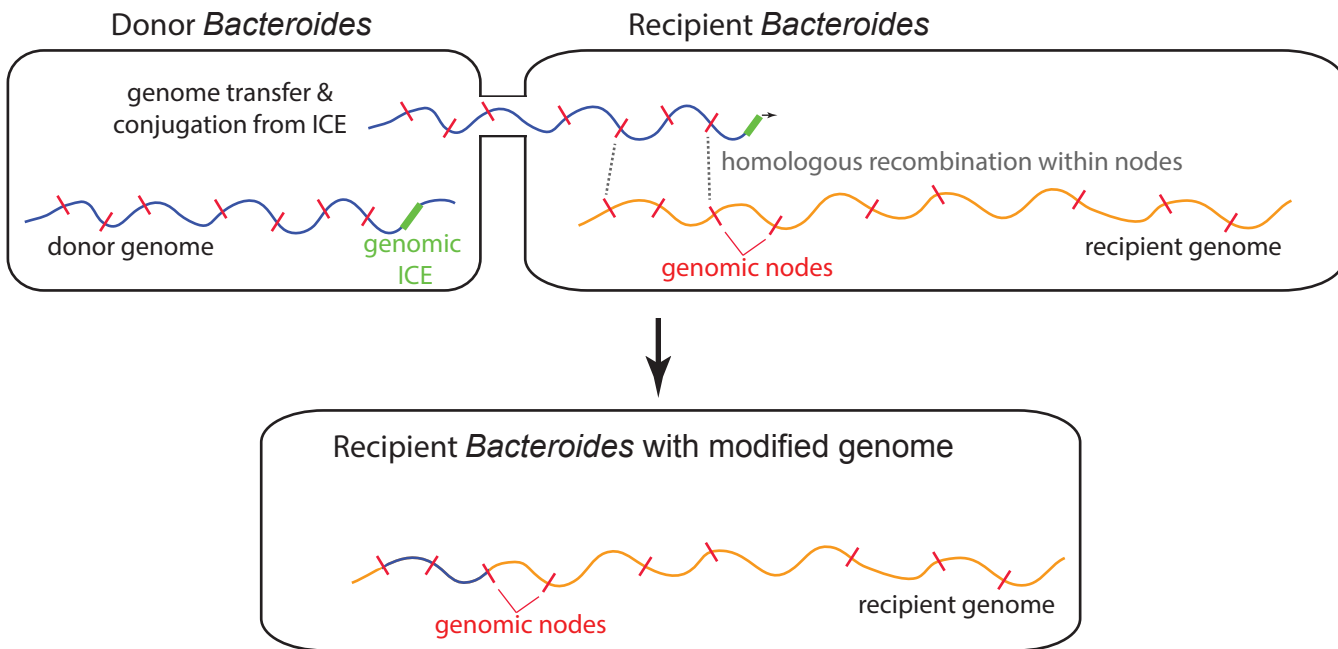

## Figure 6

A.

1) Identify core genes and create alignments

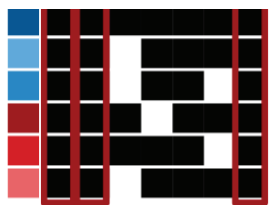

2) Create individual gene trees

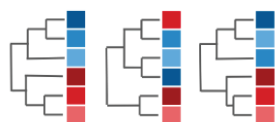

3) Identify gene trees that demonstrate patterns of LGT

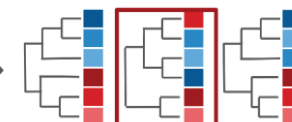

4) Identify shared accessory genes that occur at LGT loci

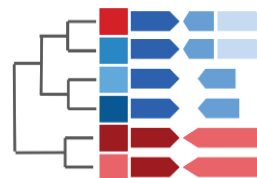

B.

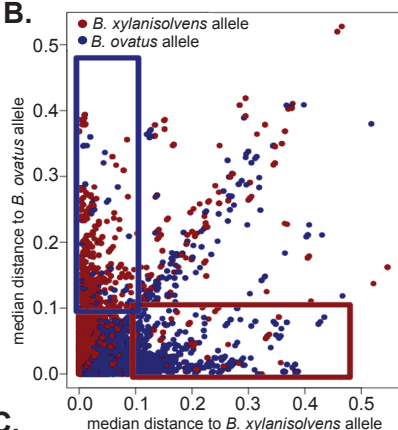

Key for panel C:

■ *Bo* allele

■ *Bx* allele

■ LGT accessory gene

■ present gene

■ absent gene

□ likely exchanged segment

■ Allele more like *B. ovatus*

■ Allele more like *B. xylanisolvans*

C.

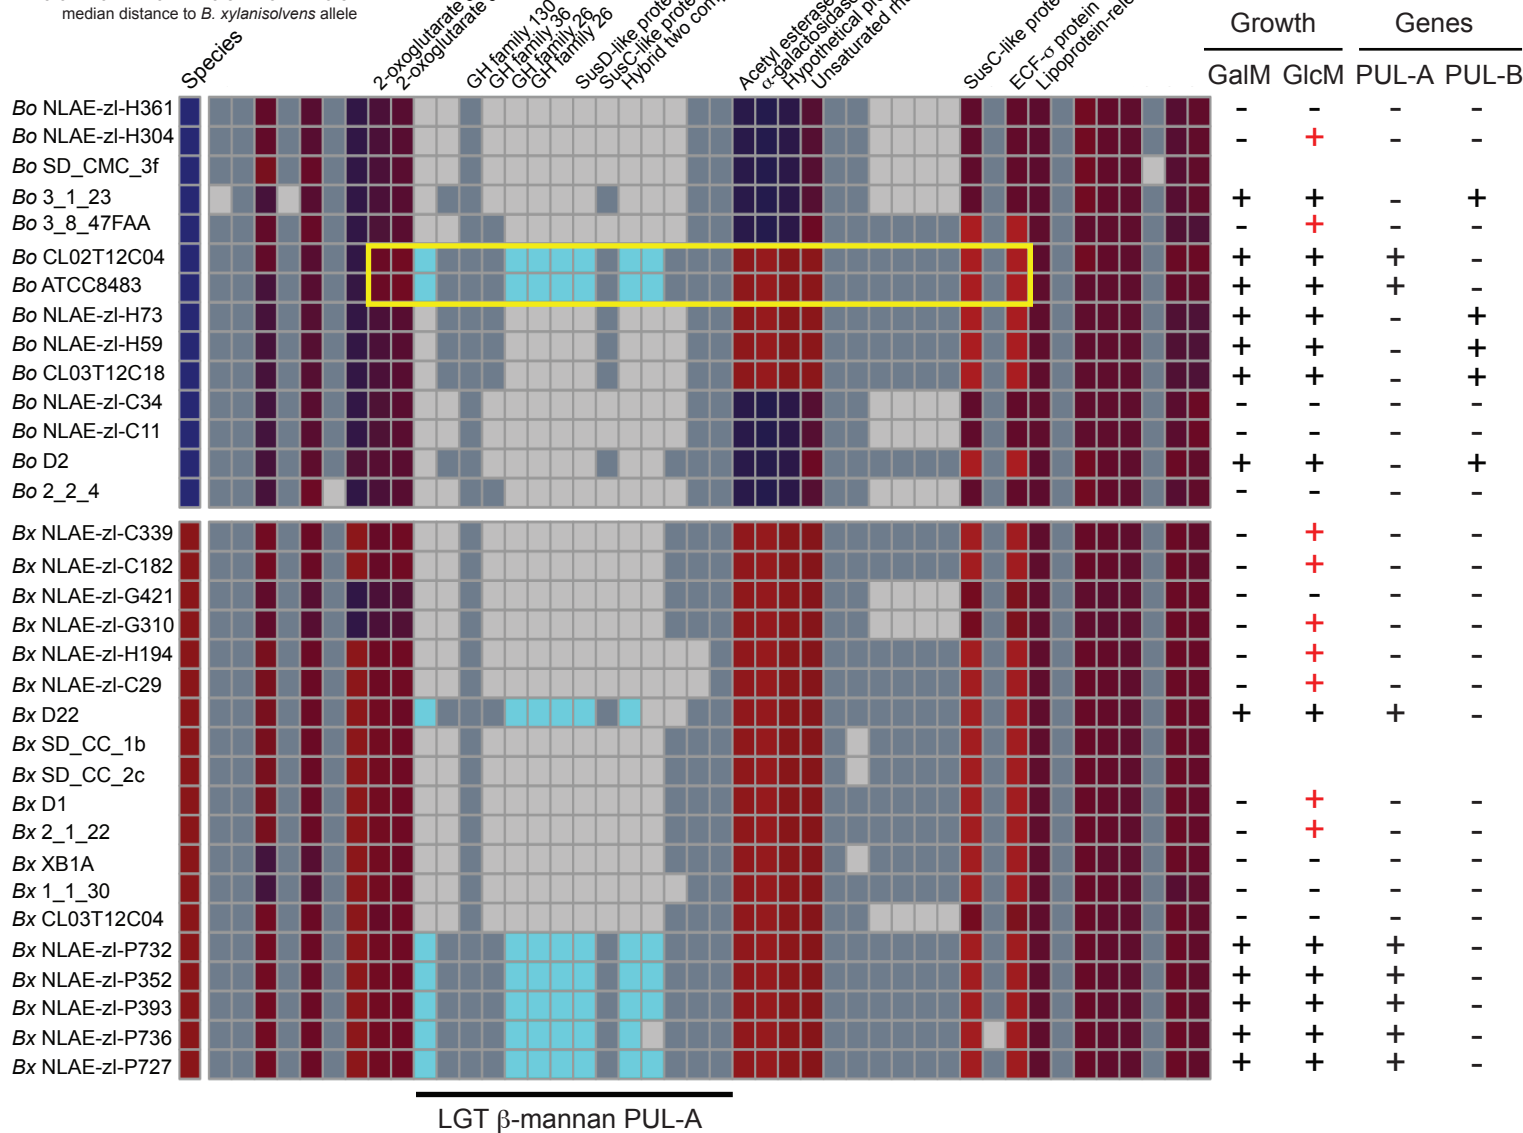

Figure S1

bioRxiv preprint doi: <https://doi.org/10.1101/2021.07.15.452266>; this version posted July 15, 2021. The copyright holder for this preprint (which was not certified by peer review) is the author/funder, who has granted bioRxiv a license to display the preprint in perpetuity. It is made available under aCC-BY-NC 4.0 International license.

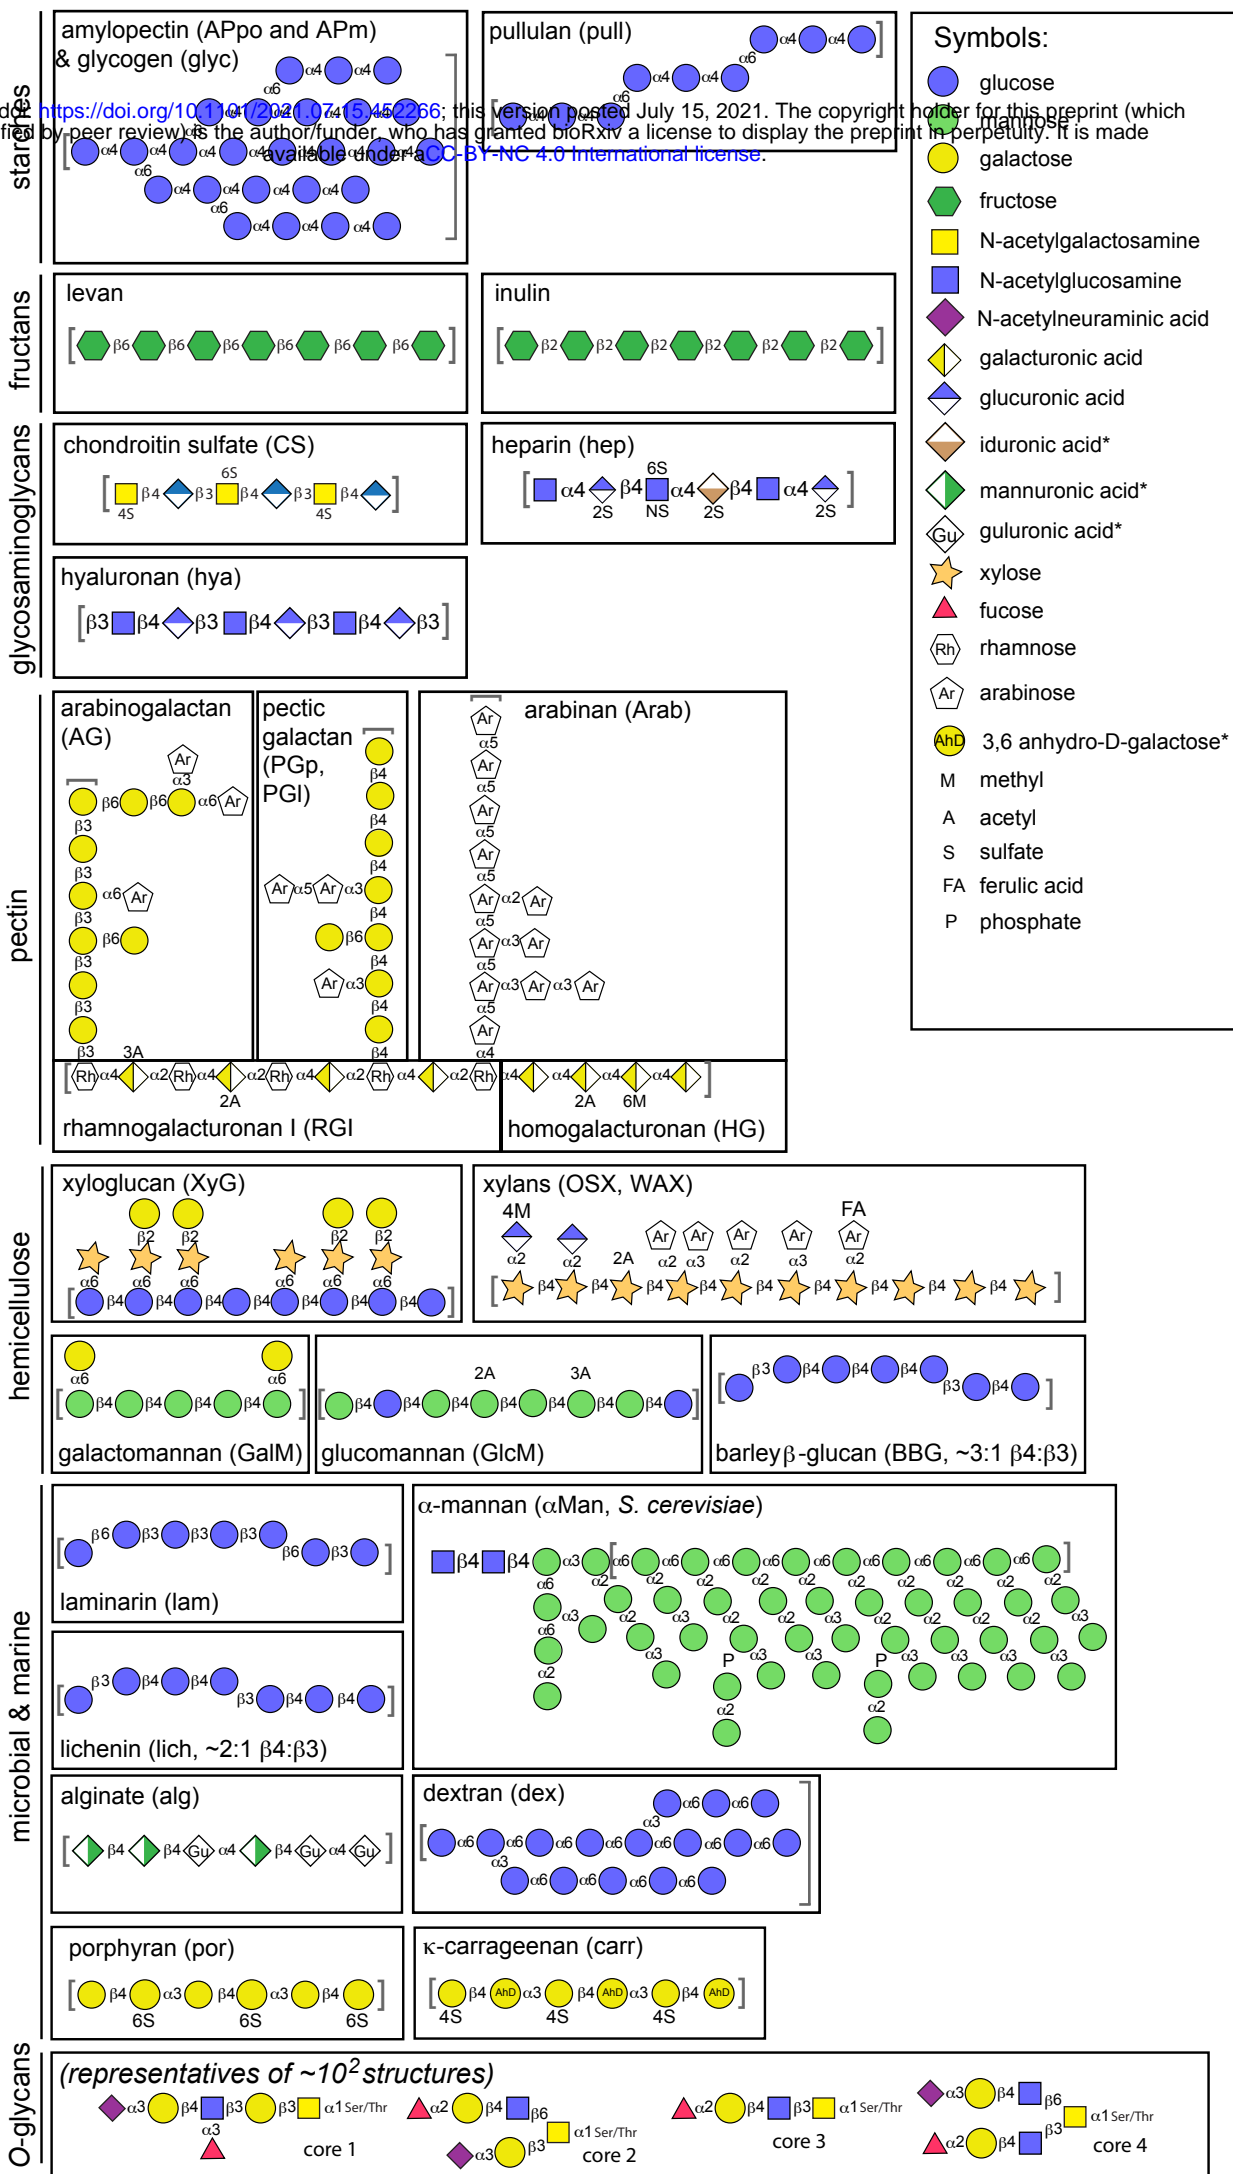



Figure S2

bioRxiv preprint doi: <https://doi.org/10.1101/2021.07.15.452266>; this version posted July 15, 2021. The copyright holder for this preprint (which was not certified by peer review) is the author/funder, who has granted bioRxiv a license to display the preprint in perpetuity. It is made available under aCC-BY-NC 4.0 International license.

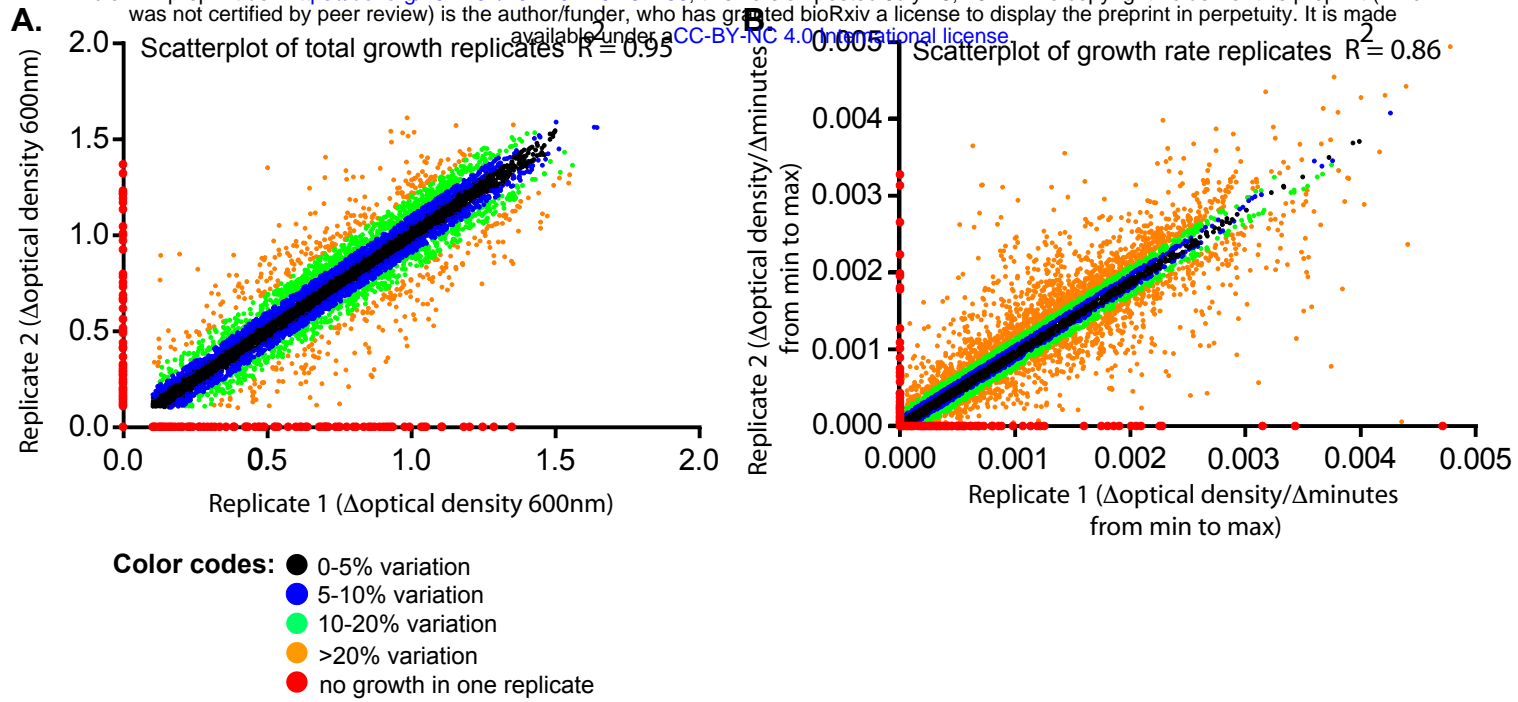

**C.**

**Polysaccharides:**

| Substrate      | $R^2$ between growth values | $R^2$ between rate values |
|----------------|-----------------------------|---------------------------|
| AG             | 0.99                        | 0.89                      |
| alg            | 0.96                        | 0.96                      |
| $\alpha$ -mann | 0.93                        | 0.76                      |
| APm            | 0.94                        | 0.92                      |
| APpo           | 0.96                        | 0.91                      |
| arab           | 0.98                        | 0.96                      |
| BBG            | 0.95                        | 0.70                      |
| carr           | 0.93                        | 0.96                      |
| Cell           | 0.96                        | 0.81                      |
| CS             | 0.96                        | 0.91                      |
| dex            | 0.96                        | 0.87                      |
| GalM           | 0.96                        | 0.98                      |
| GlcM           | 0.93                        | 0.85                      |
| glyc           | 0.96                        | 0.94                      |
| hep            | 0.96                        | 0.85                      |
| hya            | 0.91                        | 0.88                      |
| inulin         | 0.92                        | 0.89                      |
| lam            | 0.96                        | 0.96                      |
| levan          | 0.96                        | 0.88                      |
| lich           | 0.80                        | 0.45                      |
| MOG            | 0.98                        | 0.97                      |
| OSX            | 0.93                        | 0.83                      |
| PGA            | 0.97                        | 0.89                      |
| PGI            | 0.95                        | 0.96                      |
| PGp            | 0.92                        | 0.92                      |
| por            | 0.85                        | 0.85                      |
| pull           | 0.84                        | 0.78                      |
| RGI            | 0.96                        | 0.98                      |
| WAX            | 0.97                        | 0.42                      |
| XyG            | 0.92                        | 0.72                      |

**Monosaccharides:**

| Substrate | $R^2$ between growth values |
|-----------|-----------------------------|
| Ara       | 0.90                        |
| Fru       | 0.90                        |
| Fuc       | 0.93                        |
| Gal       | 0.60                        |
| GalA      | 0.86                        |
| GalNAc    | 0.93                        |
| Glc       | 0.69                        |
| GlcA      | 0.87                        |
| GlcNAc    | 0.72                        |
| GlcNH3    | 0.93                        |
| Man       | 0.88                        |
| NeuNAc    | 0.86                        |
| Rha       | 0.96                        |
| Rib       | 0.94                        |
| Xyl       | 0.85                        |

Figure S3

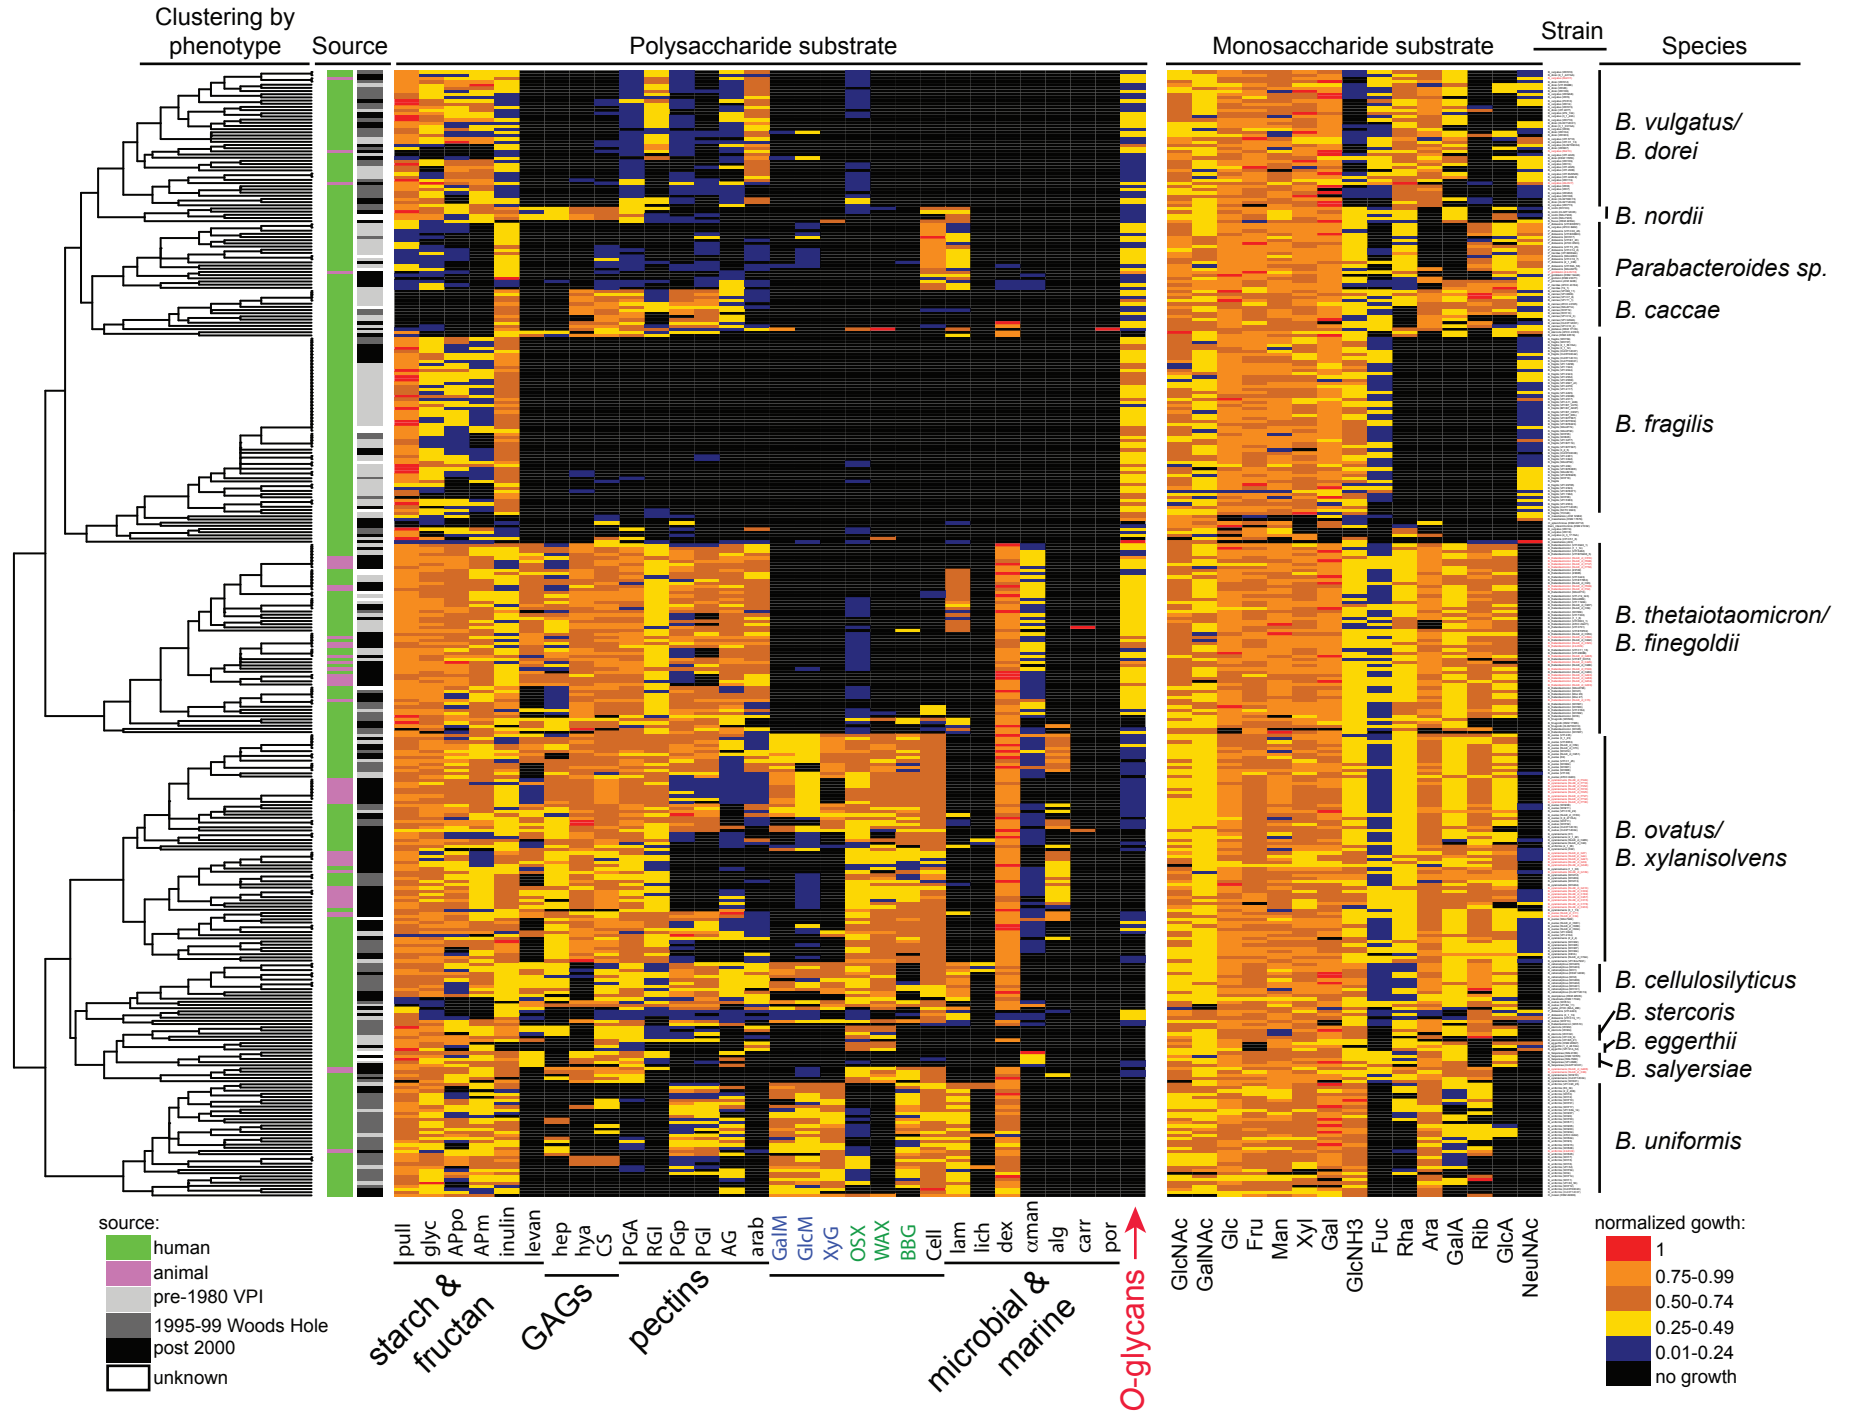

Figure S4

bioRxiv preprint doi: <https://doi.org/10.1101/2021.07.15.452266>; this version posted July 15, 2021. The copyright holder for this preprint (which was not certified by peer review) is the author/funder, who has granted bioRxiv a license to display the preprint in perpetuity. It is made available under a [CC-BY-NC 4.0 International license](#).

**A. Example of Cluster scoring scheme**

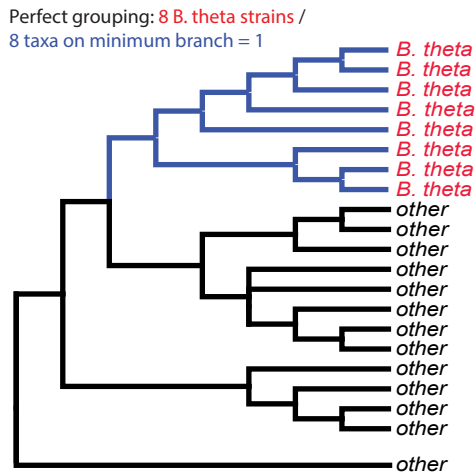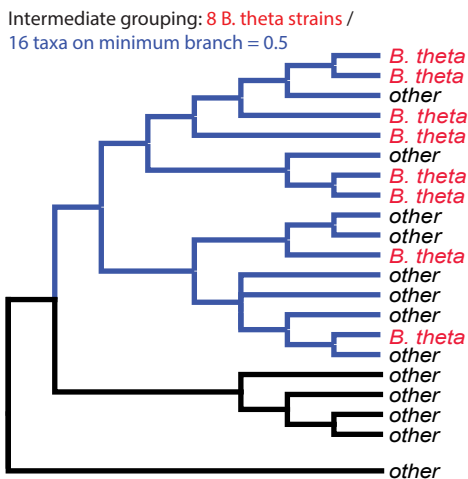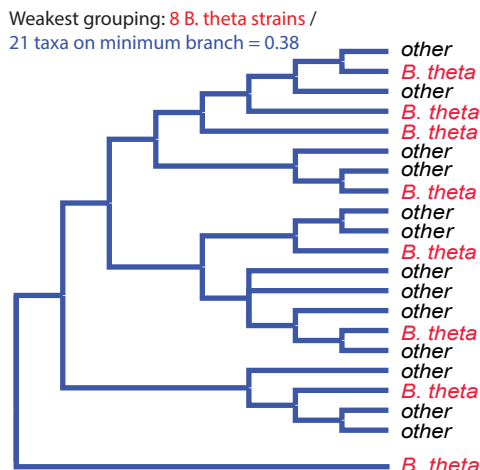

**B. Normalized data**

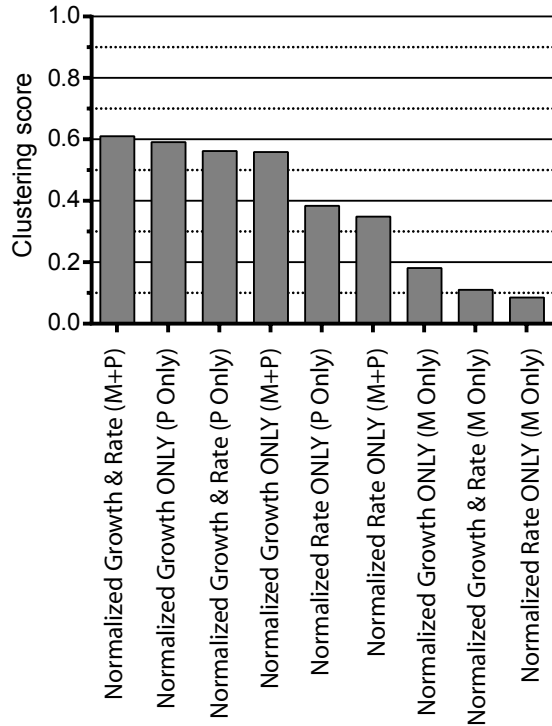

**C. Unnormalized (raw) or binary (growth/no growth) data**

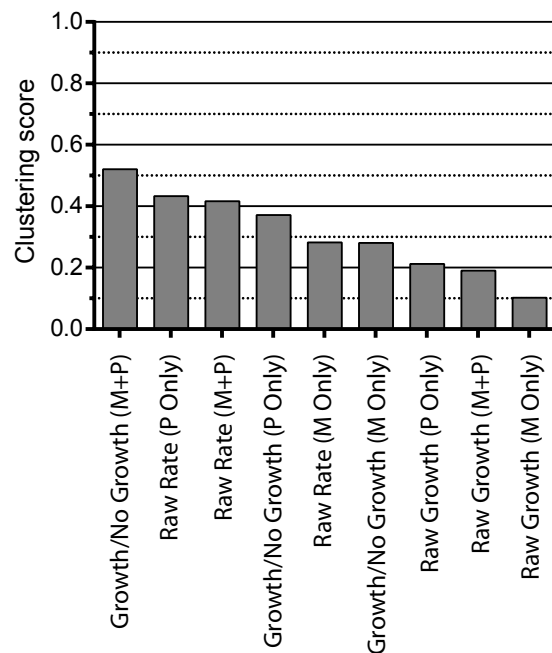

P= polysaccharide data  
M = monosaccharide data

starches

fructans

GAGs

pectins

hemi-celluloses

microbial & marine

O-glycans

|        | Pull  | Glyc  | APp   | APm   | Inulin | Levan | Hep   | Hya   | CS    | PGA   | RGI   | PGp   | PGI   | AG    | Arab  | GalM  | GlcM  | XyG   | OSX   | WAX   | BBG   | Cell  | Lam   | Lich  | Dex   | αmann | Alg   | Carr  | Porph | MOG   |
|--------|-------|-------|-------|-------|--------|-------|-------|-------|-------|-------|-------|-------|-------|-------|-------|-------|-------|-------|-------|-------|-------|-------|-------|-------|-------|-------|-------|-------|-------|-------|
| Pull   | 1.00  | 0.60  | 0.43  | 0.51  | 0.10   | 0.11  | 0.14  | -0.03 | -0.06 | -0.04 | 0.10  | -0.07 | -0.12 | 0.03  | 0.07  | 0.05  | 0.04  | 0.04  | 0.07  | 0.02  | 0.10  | -0.12 | -0.14 | 0.02  | 0.12  | 0.08  | 0.09  | 0.02  | -0.12 | -0.05 |
| Glyc   | 0.60  | 1.00  | 0.52  | 0.68  | 0.04   | 0.39  | 0.47  | 0.35  | 0.38  | 0.37  | 0.41  | 0.26  | 0.23  | 0.33  | 0.25  | 0.21  | 0.22  | 0.23  | 0.38  | 0.31  | 0.32  | 0.14  | 0.04  | 0.14  | 0.50  | 0.32  | 0.18  | 0.03  | -0.09 | -0.16 |
| App    | 0.43  | 0.52  | 1.00  | 0.72  | 0.02   | 0.35  | 0.30  | 0.30  | 0.37  | 0.30  | 0.37  | 0.17  | 0.14  | 0.28  | 0.27  | 0.07  | 0.06  | 0.03  | 0.23  | 0.17  | 0.28  | 0.01  | -0.13 | 0.01  | 0.36  | 0.28  | 0.19  | 0.05  | -0.07 | -0.05 |
| Apm    | 0.51  | 0.68  | 0.72  | 1.00  | -0.04  | 0.25  | 0.41  | 0.31  | 0.33  | 0.37  | 0.39  | 0.25  | 0.20  | 0.32  | 0.30  | 0.21  | 0.16  | 0.17  | 0.30  | 0.21  | 0.32  | 0.07  | -0.05 | 0.11  | 0.43  | 0.29  | 0.13  | 0.01  | -0.08 | -0.22 |
| Inulin | 0.10  | 0.04  | 0.02  | -0.04 | 1.00   | -0.03 | 0.09  | 0.16  | 0.08  | 0.08  | 0.00  | -0.07 | -0.01 | -0.02 | -0.23 | -0.01 | 0.00  | -0.02 | 0.06  | 0.09  | 0.08  | 0.10  | 0.00  | 0.08  | 0.05  | 0.03  | 0.09  | 0.03  | 0.07  | 0.05  |
| Levan  | 0.11  | 0.39  | 0.35  | 0.25  | -0.03  | 1.00  | 0.62  | 0.55  | 0.63  | 0.64  | 0.58  | 0.44  | 0.43  | 0.53  | 0.37  | 0.08  | 0.09  | 0.14  | 0.31  | 0.29  | 0.20  | 0.09  | 0.12  | -0.04 | 0.55  | 0.47  | 0.33  | 0.10  | -0.04 | -0.07 |
| Hep    | 0.14  | 0.47  | 0.30  | 0.41  | 0.09   | 0.62  | 1.00  | 0.65  | 0.69  | 0.66  | 0.66  | 0.38  | 0.36  | 0.35  | 0.26  | 0.18  | 0.17  | 0.16  | 0.54  | 0.52  | 0.47  | 0.35  | 0.04  | 0.00  | 0.70  | 0.37  | 0.34  | 0.06  | -0.04 | -0.22 |
| Hya    | -0.03 | 0.35  | 0.30  | 0.31  | 0.16   | 0.55  | 0.65  | 1.00  | 0.83  | 0.77  | 0.69  | 0.44  | 0.45  | 0.44  | 0.26  | 0.05  | 0.02  | 0.04  | 0.40  | 0.38  | 0.40  | 0.23  | -0.09 | -0.08 | 0.64  | 0.56  | 0.37  | 0.07  | 0.05  | -0.10 |
| CS     | -0.06 | 0.38  | 0.37  | 0.33  | 0.08   | 0.63  | 0.69  | 0.83  | 1.00  | 0.83  | 0.68  | 0.50  | 0.51  | 0.48  | 0.32  | 0.08  | 0.06  | 0.04  | 0.46  | 0.45  | 0.38  | 0.23  | -0.02 | -0.06 | 0.67  | 0.54  | 0.30  | 0.10  | 0.03  | -0.13 |
| PGA    | -0.04 | 0.37  | 0.30  | 0.37  | 0.08   | 0.64  | 0.66  | 0.77  | 0.83  | 1.00  | 0.72  | 0.55  | 0.55  | 0.55  | 0.46  | 0.03  | -0.01 | 0.02  | 0.44  | 0.44  | 0.24  | 0.14  | -0.07 | -0.06 | 0.62  | 0.56  | 0.28  | 0.10  | 0.06  | -0.10 |
| RGI    | 0.10  | 0.41  | 0.37  | 0.39  | 0.00   | 0.58  | 0.66  | 0.69  | 0.68  | 0.72  | 1.00  | 0.43  | 0.39  | 0.39  | 0.46  | 0.12  | 0.07  | 0.07  | 0.57  | 0.52  | 0.44  | 0.25  | -0.19 | -0.06 | 0.56  | 0.45  | 0.41  | 0.04  | 0.10  | -0.14 |
| PGp    | -0.07 | 0.26  | 0.17  | 0.25  | -0.07  | 0.44  | 0.38  | 0.44  | 0.50  | 0.55  | 0.43  | 1.00  | 0.92  | 0.53  | 0.40  | 0.30  | 0.23  | 0.44  | 0.24  | 0.23  | 0.23  | 0.17  | 0.22  | 0.05  | 0.57  | 0.41  | 0.19  | 0.11  | -0.01 | -0.07 |
| PGI    | -0.12 | 0.23  | 0.14  | 0.20  | -0.01  | 0.43  | 0.36  | 0.45  | 0.51  | 0.55  | 0.39  | 0.92  | 1.00  | 0.53  | 0.36  | 0.29  | 0.22  | 0.42  | 0.22  | 0.21  | 0.22  | 0.19  | 0.22  | 0.06  | 0.56  | 0.43  | 0.21  | 0.11  | -0.01 | -0.02 |
| AG     | 0.03  | 0.33  | 0.28  | 0.32  | -0.02  | 0.53  | 0.35  | 0.44  | 0.48  | 0.55  | 0.39  | 0.53  | 0.53  | 1.00  | 0.54  | -0.03 | -0.07 | -0.02 | -0.05 | -0.08 | -0.06 | -0.13 | 0.15  | -0.03 | 0.48  | 0.66  | 0.04  | 0.05  | 0.02  | 0.22  |
| Arab   | 0.07  | 0.25  | 0.27  | 0.30  | -0.23  | 0.37  | 0.26  | 0.26  | 0.32  | 0.46  | 0.46  | 0.40  | 0.36  | 0.54  | 1.00  | -0.03 | -0.14 | -0.04 | 0.05  | 0.02  | -0.22 | -0.25 | 0.04  | -0.02 | 0.24  | 0.45  | -0.02 | 0.03  | 0.05  | 0.20  |
| GalM   | 0.05  | 0.21  | 0.07  | 0.21  | -0.01  | 0.08  | 0.18  | 0.05  | 0.08  | 0.03  | 0.12  | 0.30  | 0.29  | -0.03 | -0.03 | 1.00  | 0.81  | 0.74  | 0.42  | 0.41  | 0.52  | 0.51  | 0.30  | 0.24  | 0.38  | -0.13 | 0.18  | 0.05  | 0.16  | -0.42 |
| GlcM   | 0.04  | 0.22  | 0.06  | 0.16  | 0.00   | 0.09  | 0.17  | 0.02  | 0.06  | -0.01 | 0.07  | 0.23  | 0.22  | -0.07 | -0.14 | 0.81  | 1.00  | 0.71  | 0.42  | 0.39  | 0.58  | 0.62  | 0.35  | 0.30  | 0.41  | -0.17 | 0.22  | 0.02  | -0.03 | -0.49 |
| XyG    | 0.04  | 0.23  | 0.03  | 0.17  | -0.02  | 0.14  | 0.16  | 0.04  | 0.04  | 0.02  | 0.07  | 0.44  | 0.42  | -0.02 | -0.04 | 0.74  | 0.71  | 1.00  | 0.42  | 0.38  | 0.50  | 0.53  | 0.34  | 0.21  | 0.41  | -0.04 | 0.29  | 0.02  | -0.03 | -0.44 |
| OSX    | 0.07  | 0.38  | 0.23  | 0.30  | 0.06   | 0.31  | 0.54  | 0.40  | 0.46  | 0.44  | 0.57  | 0.24  | 0.22  | -0.05 | 0.05  | 0.42  | 0.42  | 0.42  | 1.00  | 0.92  | 0.69  | 0.63  | -0.08 | 0.07  | 0.51  | 0.01  | 0.51  | 0.03  | 0.14  | -0.53 |
| WAX    | 0.02  | 0.31  | 0.17  | 0.21  | 0.09   | 0.29  | 0.52  | 0.38  | 0.45  | 0.44  | 0.52  | 0.23  | 0.21  | -0.08 | 0.02  | 0.41  | 0.39  | 0.38  | 0.92  | 1.00  | 0.62  | 0.62  | -0.07 | 0.04  | 0.47  | -0.01 | 0.50  | -0.01 | 0.13  | -0.50 |
| BBG    | 0.10  | 0.32  | 0.28  | 0.32  | 0.08   | 0.20  | 0.47  | 0.40  | 0.38  | 0.24  | 0.44  | 0.23  | 0.22  | -0.06 | -0.22 | 0.52  | 0.58  | 0.50  | 0.69  | 0.62  | 1.00  | 0.70  | -0.03 | 0.13  | 0.57  | -0.01 | 0.48  | 0.02  | -0.03 | -0.55 |
| Cell   | -0.12 | 0.14  | 0.01  | 0.07  | 0.10   | 0.09  | 0.35  | 0.23  | 0.23  | 0.14  | 0.25  | 0.17  | 0.19  | -0.13 | -0.25 | 0.51  | 0.62  | 0.53  | 0.63  | 0.62  | 0.70  | 1.00  | 0.27  | 0.14  | 0.47  | -0.09 | 0.39  | -0.01 | -0.05 | -0.55 |
| Lam    | -0.14 | 0.04  | -0.13 | -0.05 | 0.00   | 0.12  | 0.04  | -0.09 | -0.02 | -0.07 | -0.19 | 0.22  | 0.22  | 0.15  | 0.04  | 0.30  | 0.35  | 0.34  | -0.08 | -0.07 | -0.03 | 0.27  | 1.00  | 0.17  | 0.21  | 0.01  | -0.19 | 0.07  | 0.13  | -0.20 |
| Lich   | 0.02  | 0.14  | 0.01  | 0.11  | 0.08   | -0.04 | 0.00  | -0.08 | -0.06 | -0.06 | -0.06 | 0.05  | 0.06  | -0.03 | -0.02 | 0.24  | 0.30  | 0.21  | 0.07  | 0.04  | 0.13  | 0.14  | 0.17  | 1.00  | 0.10  | -0.07 | -0.05 | -0.01 | -0.01 | -0.16 |
| Dex    | 0.12  | 0.50  | 0.36  | 0.43  | 0.05   | 0.55  | 0.70  | 0.64  | 0.67  | 0.62  | 0.56  | 0.57  | 0.56  | 0.48  | 0.24  | 0.38  | 0.41  | 0.41  | 0.51  | 0.47  | 0.57  | 0.47  | 0.21  | 0.10  | 1.00  | 0.42  | 0.32  | 0.08  | -0.06 | -0.36 |
| αmann  | 0.08  | 0.32  | 0.28  | 0.29  | 0.03   | 0.47  | 0.37  | 0.56  | 0.54  | 0.56  | 0.45  | 0.41  | 0.43  | 0.66  | 0.45  | -0.13 | -0.17 | -0.04 | 0.01  | -0.01 | -0.01 | -0.09 | 0.01  | -0.07 | 0.42  | 1.00  | 0.11  | 0.13  | -0.03 | 0.19  |
| Alg    | 0.09  | 0.18  | 0.19  | 0.13  | 0.09   | 0.33  | 0.34  | 0.37  | 0.30  | 0.28  | 0.41  | 0.19  | 0.21  | 0.04  | -0.02 | 0.18  | 0.22  | 0.29  | 0.51  | 0.50  | 0.48  | 0.39  | -0.19 | -0.05 | 0.32  | 0.11  | 1.00  | -0.03 | -0.02 | -0.24 |
| Carr   | 0.02  | 0.03  | 0.05  | 0.01  | 0.03   | 0.10  | 0.06  | 0.07  | 0.10  | 0.10  | 0.04  | 0.11  | 0.11  | 0.05  | 0.03  | 0.05  | 0.02  | 0.02  | 0.03  | -0.01 | 0.02  | -0.01 | 0.07  | -0.01 | 0.08  | 0.13  | -0.03 | 1.00  | 0.00  | -0.01 |
| Porph  | -0.12 | -0.09 | -0.07 | -0.08 | 0.07   | -0.04 | -0.04 | 0.05  | 0.03  | 0.06  | 0.10  | -0.01 | -0.01 | 0.02  | 0.05  | 0.16  | -0.03 | -0.03 | 0.14  | 0.13  | -0.03 | -0.05 | 0.13  | -0.01 | -0.06 | -0.03 | -0.02 | 0.00  | 1.00  | 0.00  |
| MOG    | -0.05 | -0.16 | -0.05 | -0.22 | 0.05   | -0.07 | -0.22 | -0.10 | -0.13 | -0.10 | -0.14 | -0.07 | -0.02 | 0.22  | 0.20  | -0.42 | -0.49 | -0.44 | -0.53 | -0.50 | -0.55 | -0.55 | -0.20 | -0.16 | -0.36 | 0.19  | -0.24 | -0.01 | 0.00  | 1.00  |

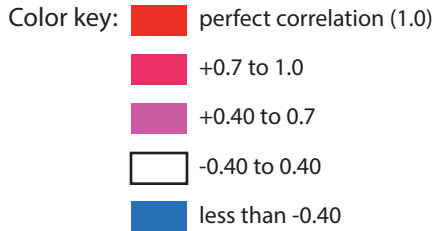

## Figure S6

Please note that Figure S6 is provided as a zipped folder containing 4 separate quarters of the pangenome assembly along with a corresponding legend that explains the color coding scheme. The four maps correspond to **Table S2**.

Each map contains 5 vertically stacked panes of pangenome map starting in the upper left. Each horizontal pane has 8 rows with the top row representing the pangenome and the corresponding 7 individual genome regions shown below.

The example below shows a small region of pangenome section 2 in which *Bo* 3-1-23 is missing an ECF- $\sigma$  regulated PUL. The small text above genes in individual genomes correspond to the contig and the green dashed line represents a region that was broken to accommodate accessory genes.

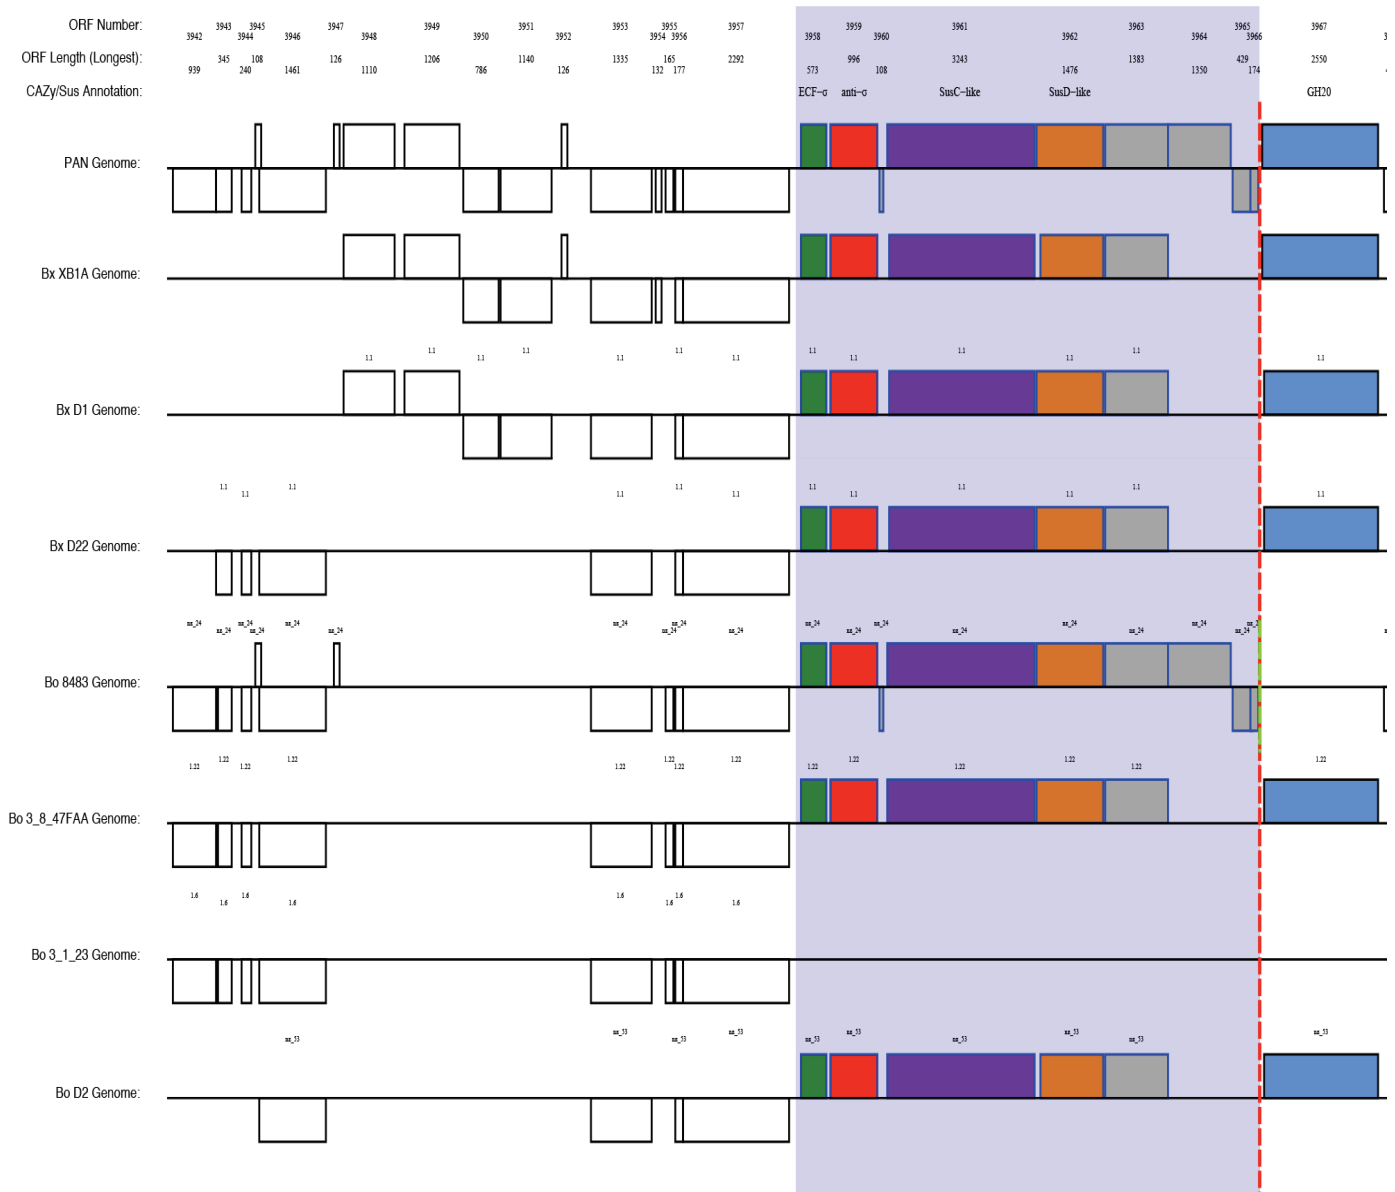

Figure S7

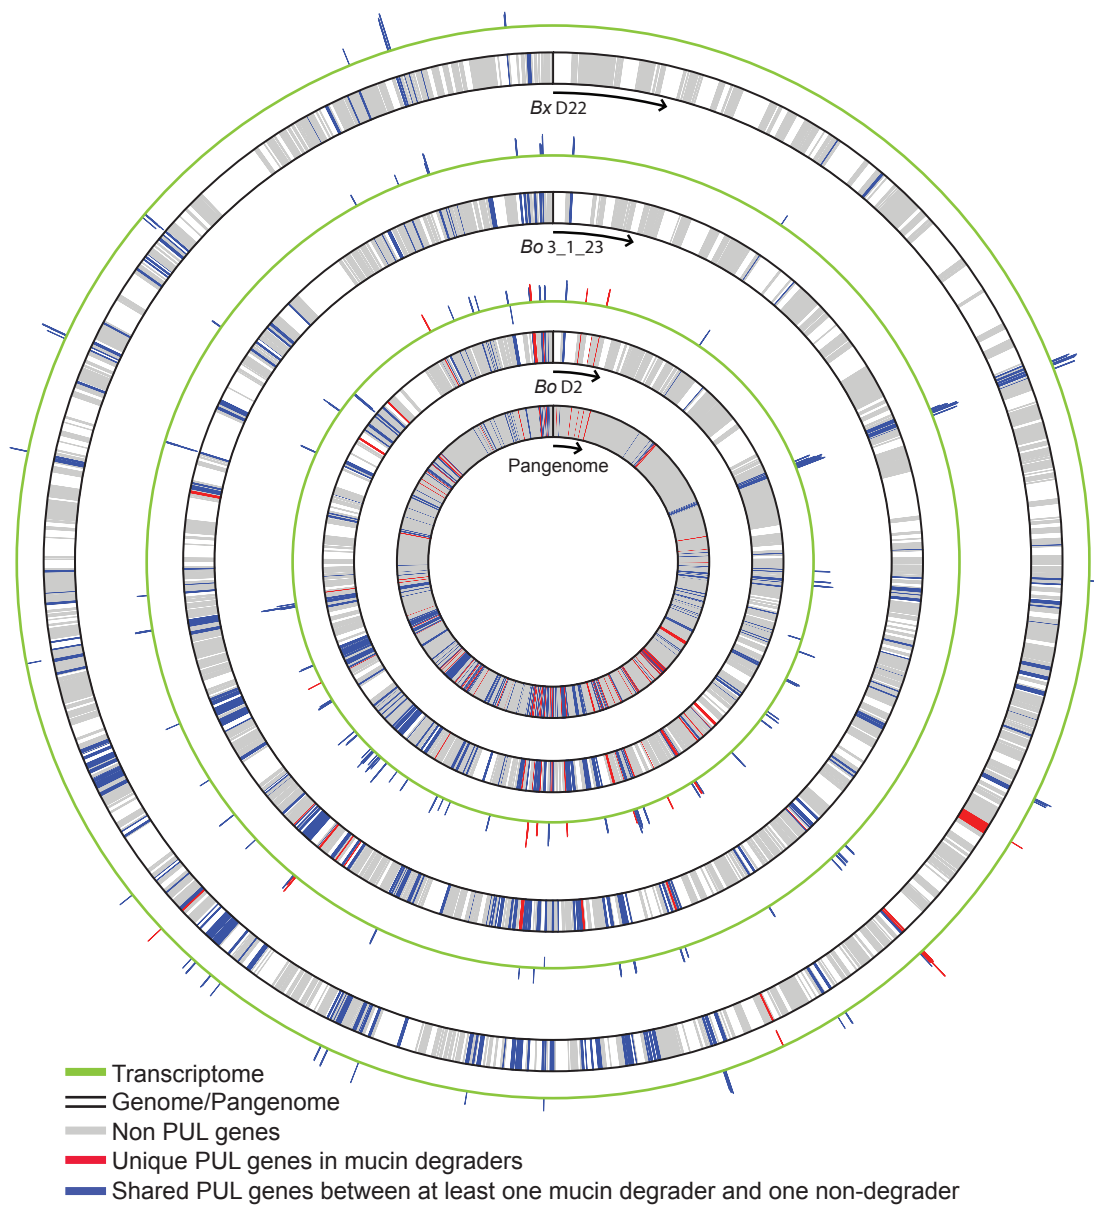

## Figure S8. Bacteroides LGT Loci

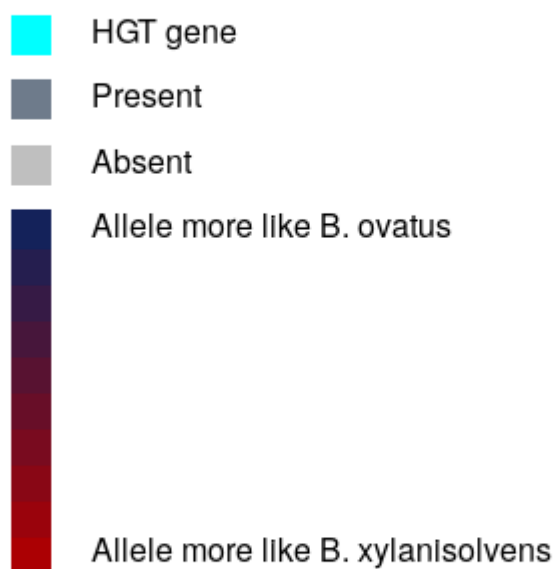

## PUL LGT Events

### B. ovatus PUL LGT Event 1

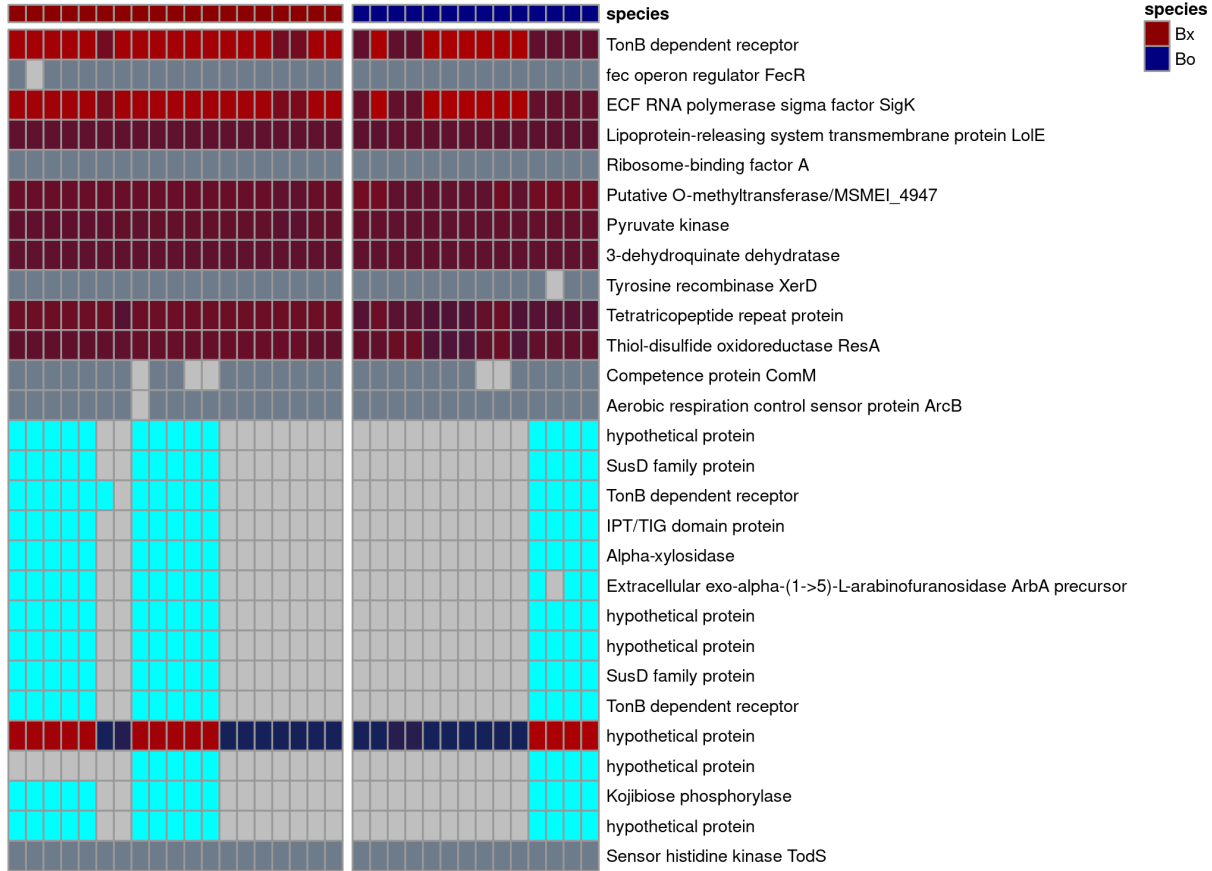

Bovatus\_NLAE-zl-H361  
 Bovatus\_NLAE-zl-H304  
 Bacteroides\_ovatus\_SD\_CMC\_3f  
 Bacteroides\_3\_1\_23  
 Bacteroides\_ovatus\_3\_8\_47FAA  
 Bovatus\_CL02T12C04  
 Bacteroides\_ovatus\_ATOC\_8483  
 Bovatus\_NLAE-zl-H73  
 Bovatus\_NLAE-zl-H59  
 Bacteroides\_ovatus\_CL03T12C18  
 Bovatus\_NLAE-zl-C34  
 Bovatus\_NLAE-zl-C11  
 Bacteroides\_2\_2\_4  
 Bacteroides\_D2  
 Bxiansolvans\_NLAE-zl-C339  
 Bxiansolvans\_NLAE-zl-C182  
 Bxiansolvans\_NLAE-zl-G421  
 Bxiansolvans\_NLAE-zl-G310  
 Bxiansolvans\_NLAE-zl-H194  
 Bxiansolvans\_NLAE-zl-C29  
 Bacteroides\_D22  
 Bacteroides\_xyiansolvans\_SD\_CC\_1b  
 Bacteroides\_ovatus\_SD\_CC\_2a  
 Bacteroides\_D1  
 Bacteroides\_2\_1\_22  
 Bacteroides\_xyiansolvans\_XB1A  
 Bacteroides\_1\_1\_30  
 Bxiansolvans\_CL03T12C04  
 Bxiansolvans\_NLAE-zl-P732  
 Bxiansolvans\_NLAE-zl-P352  
 Bxiansolvans\_NLAE-zl-P393  
 Bxiansolvans\_NLAE-zl-P736  
 Bxiansolvans\_NLAE-zl-P727



### B. ovatus PUL LGT Event 2

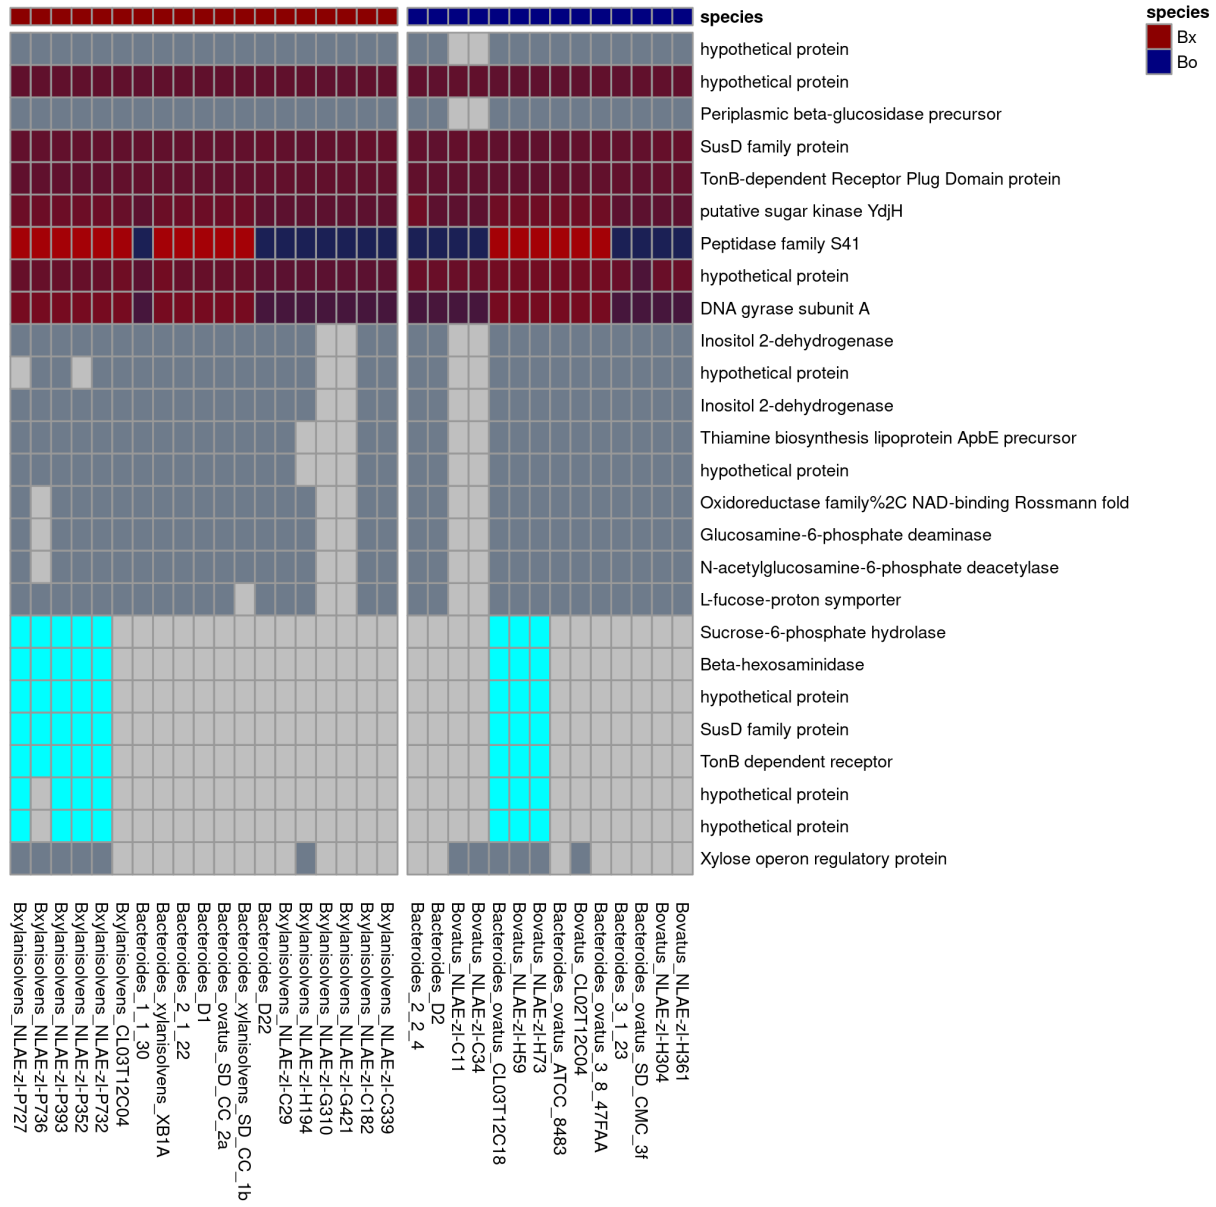

### B. ovatus PUL LGT Event 3

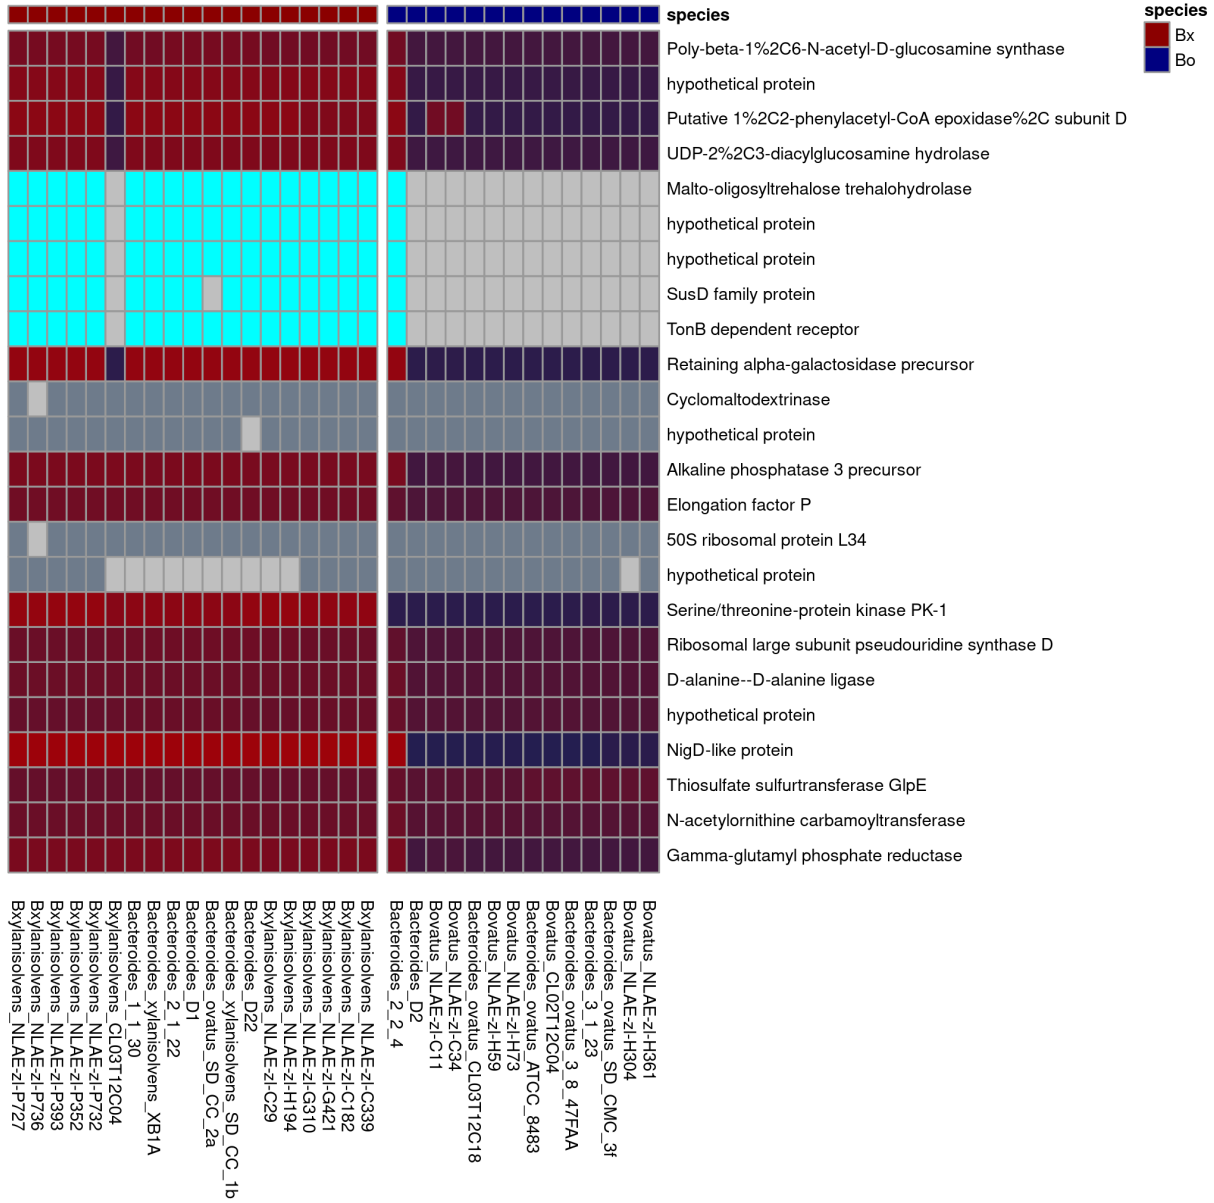

### B. ovatus PUL LGT Event 4

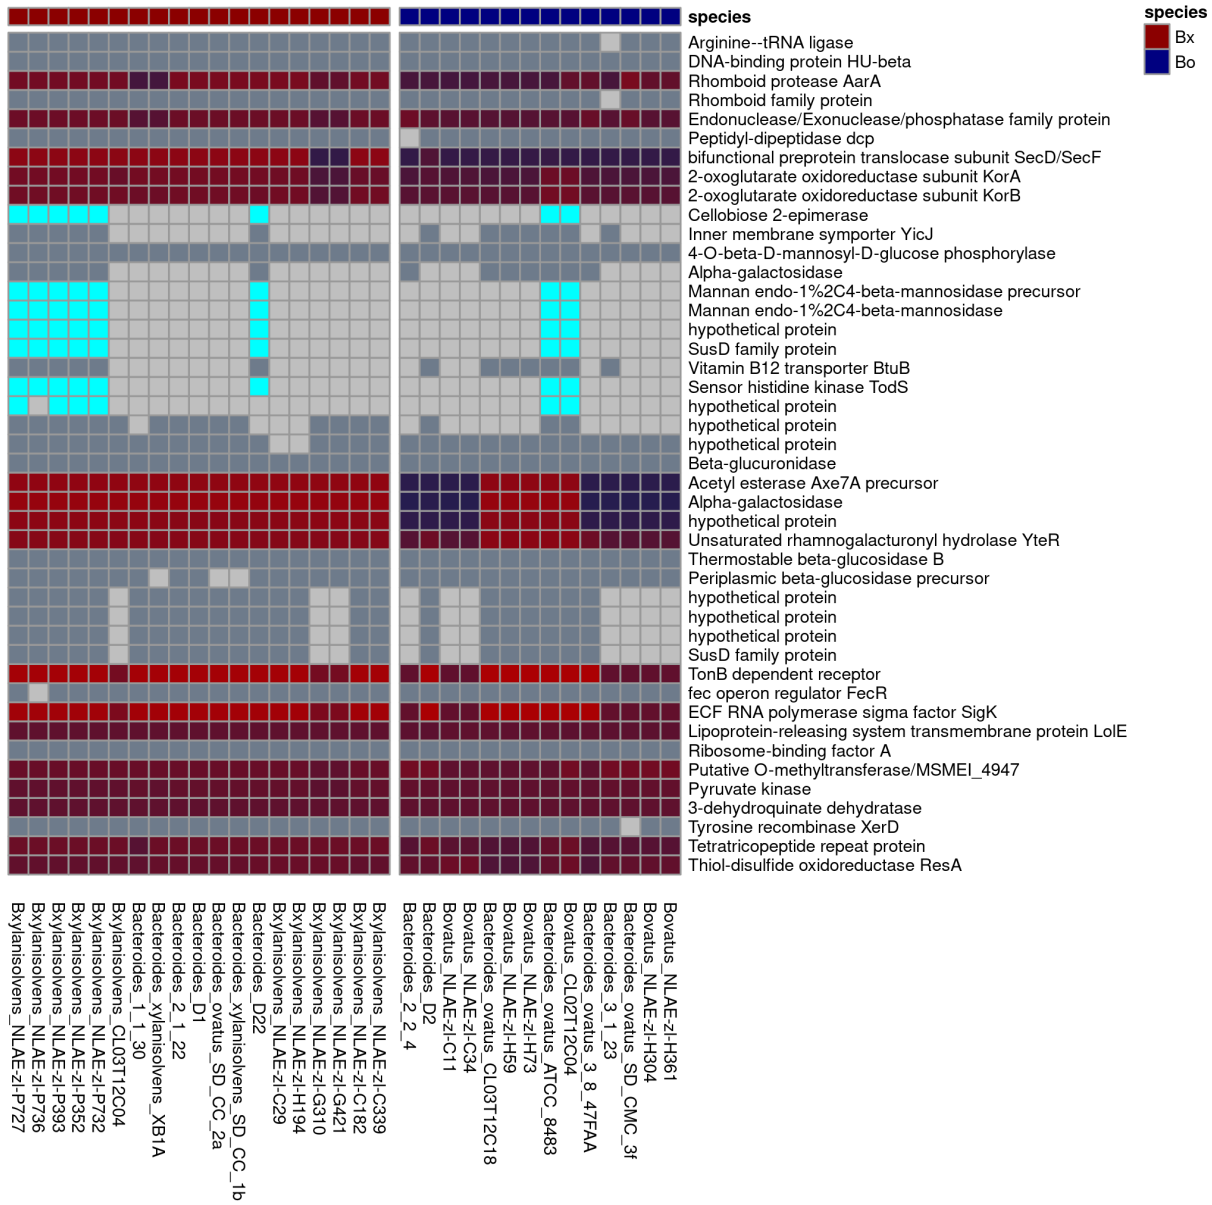

### B. xylanisolvans PUL LGT Event 1

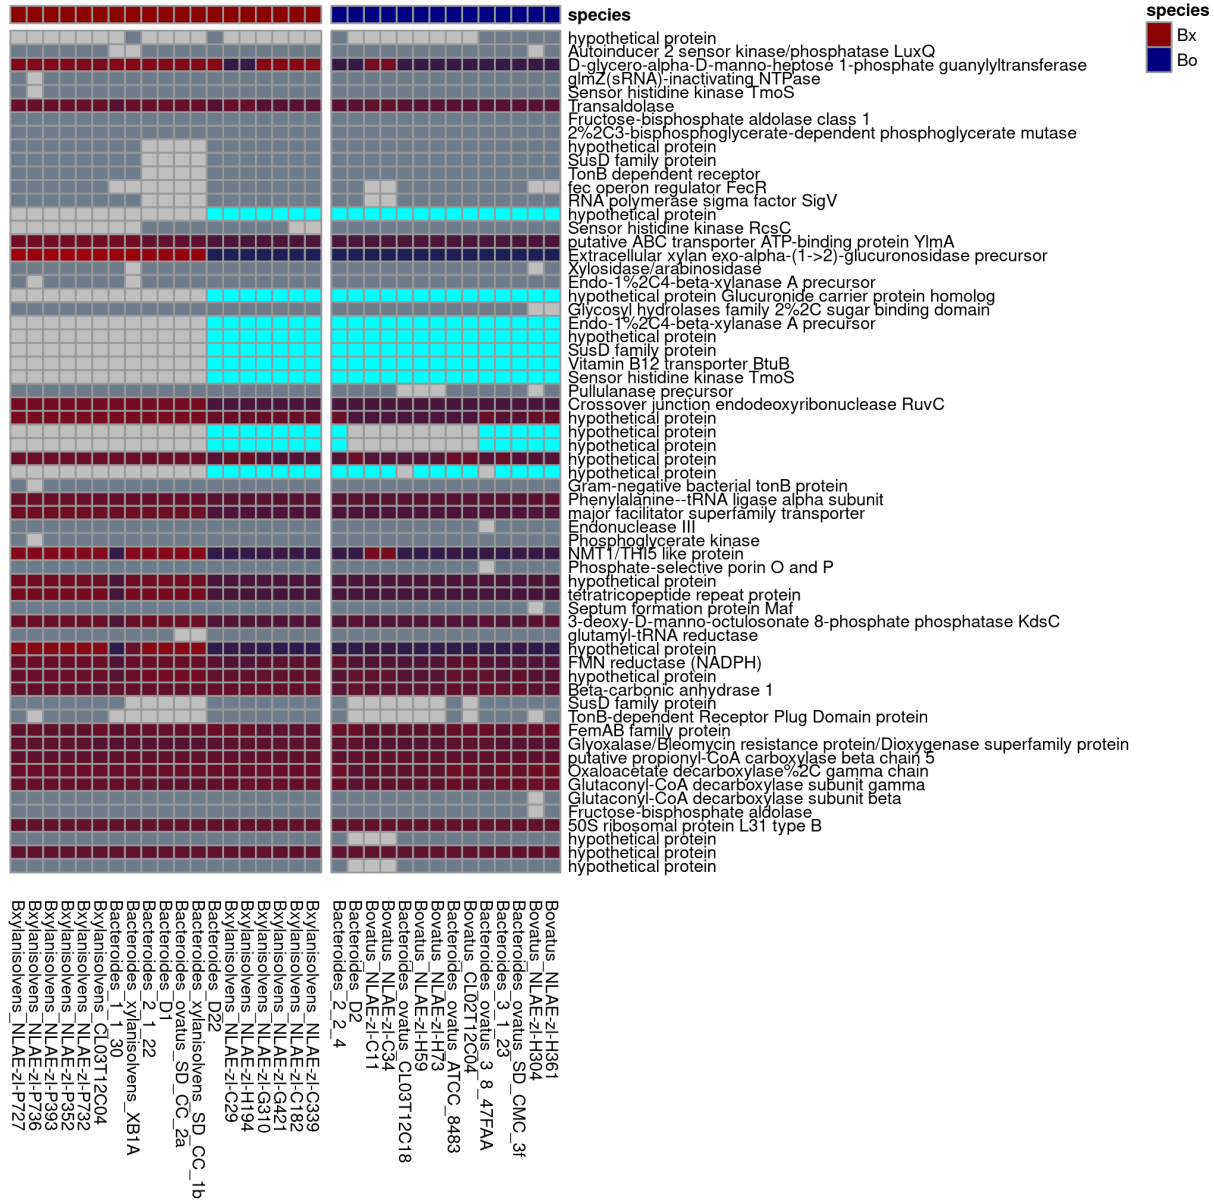

### B. xylanisolvans PUL LGT Event 2

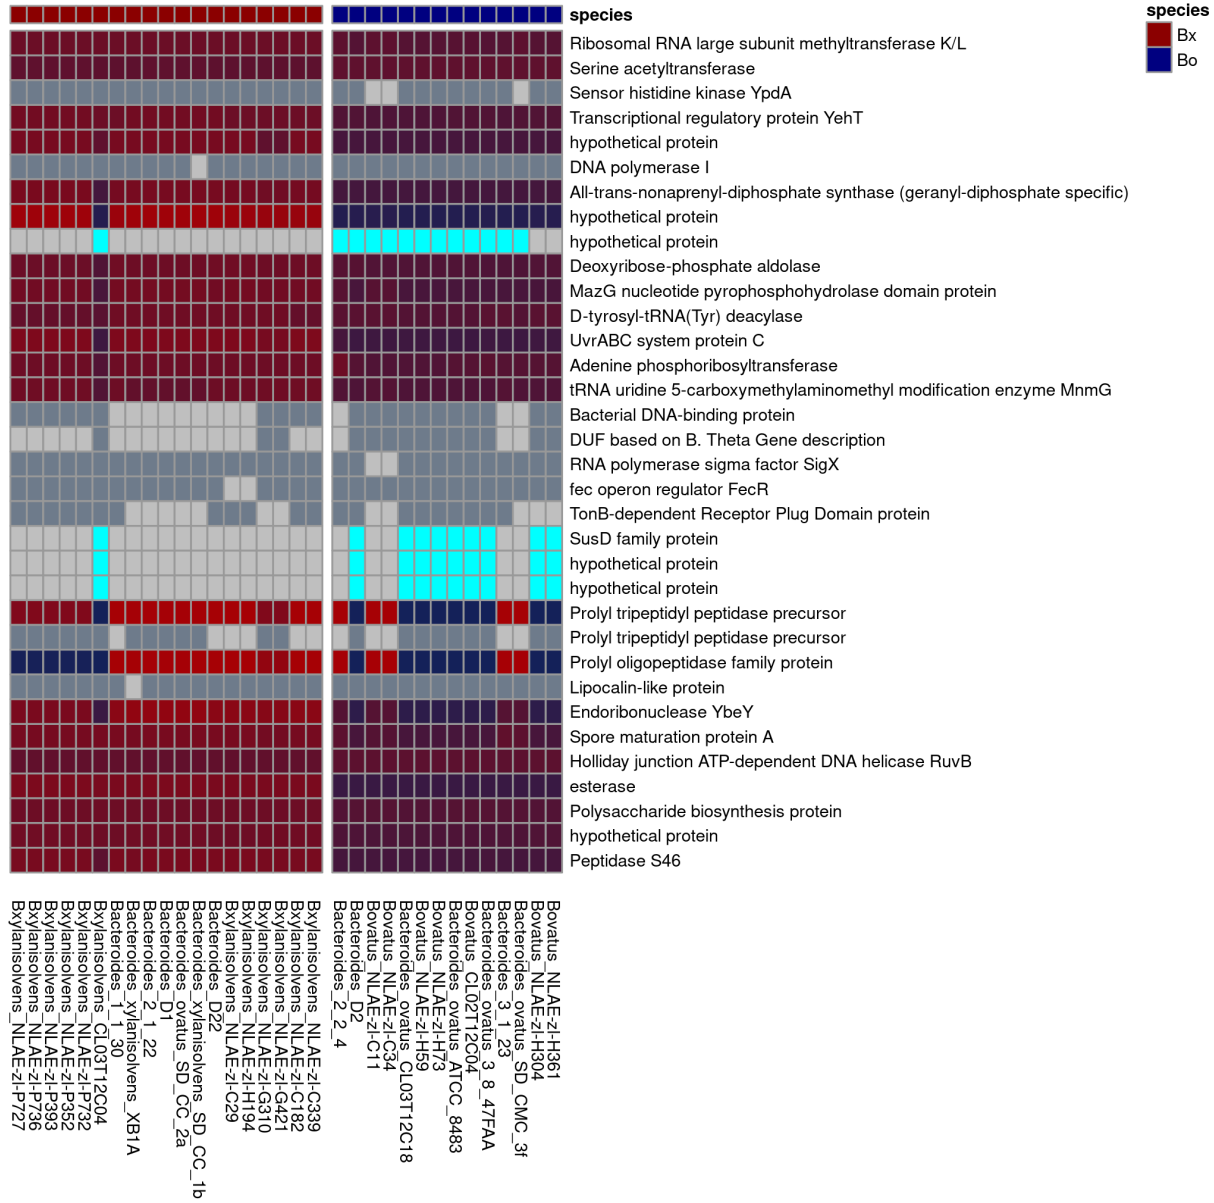

### B. xylanisolvens PUL LGT Event 3

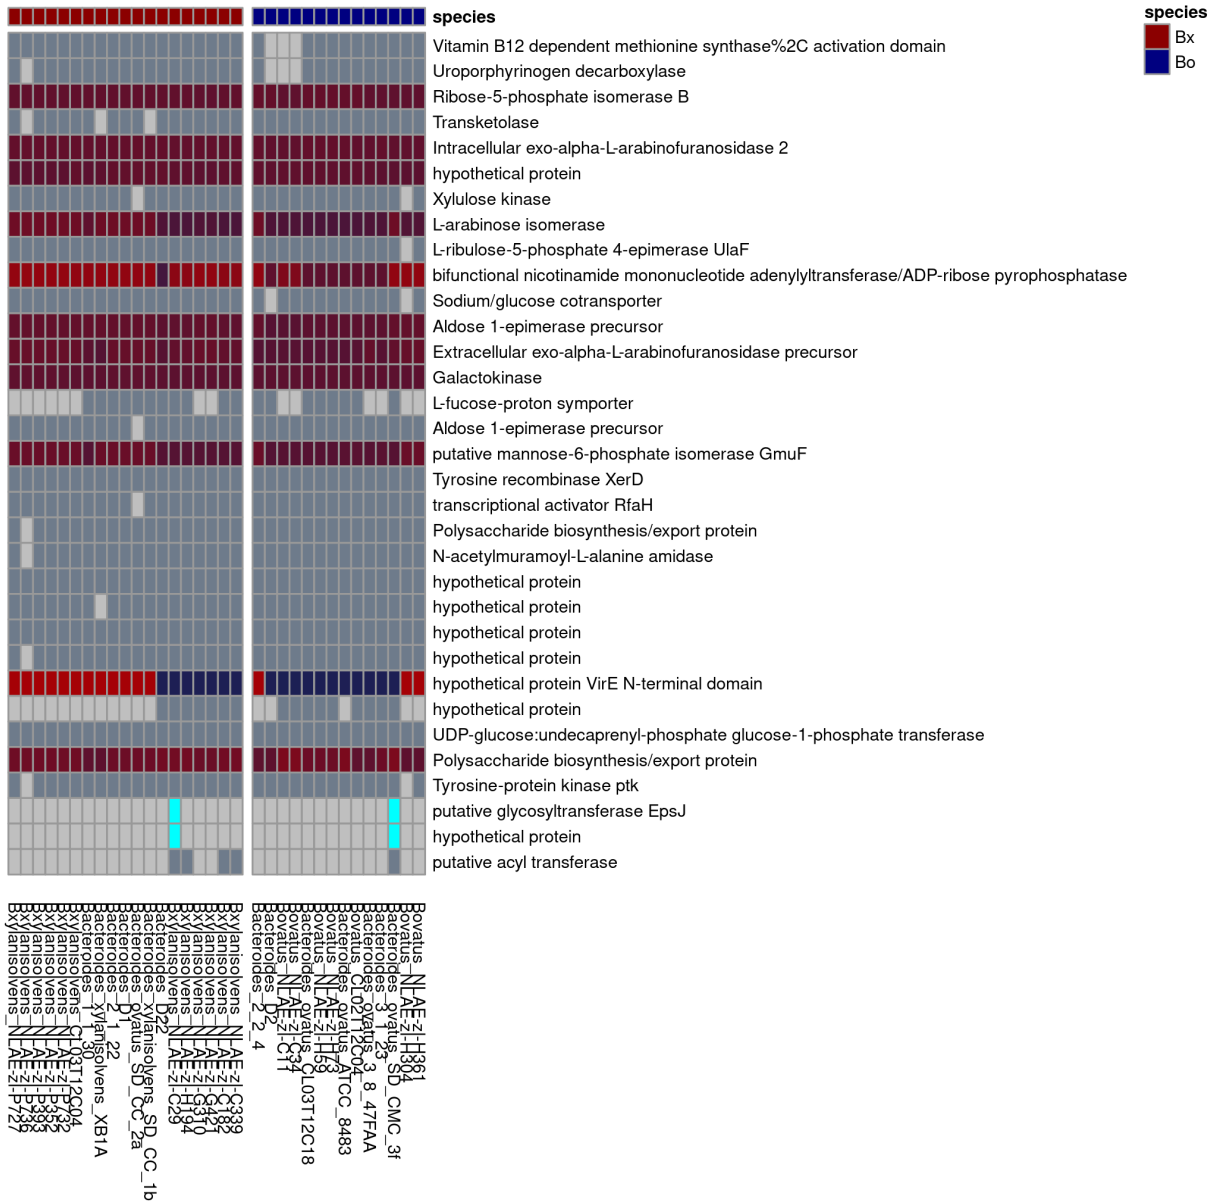

## non-PUL LGT Events

### B. ovatus non-PUL LGT Event 1

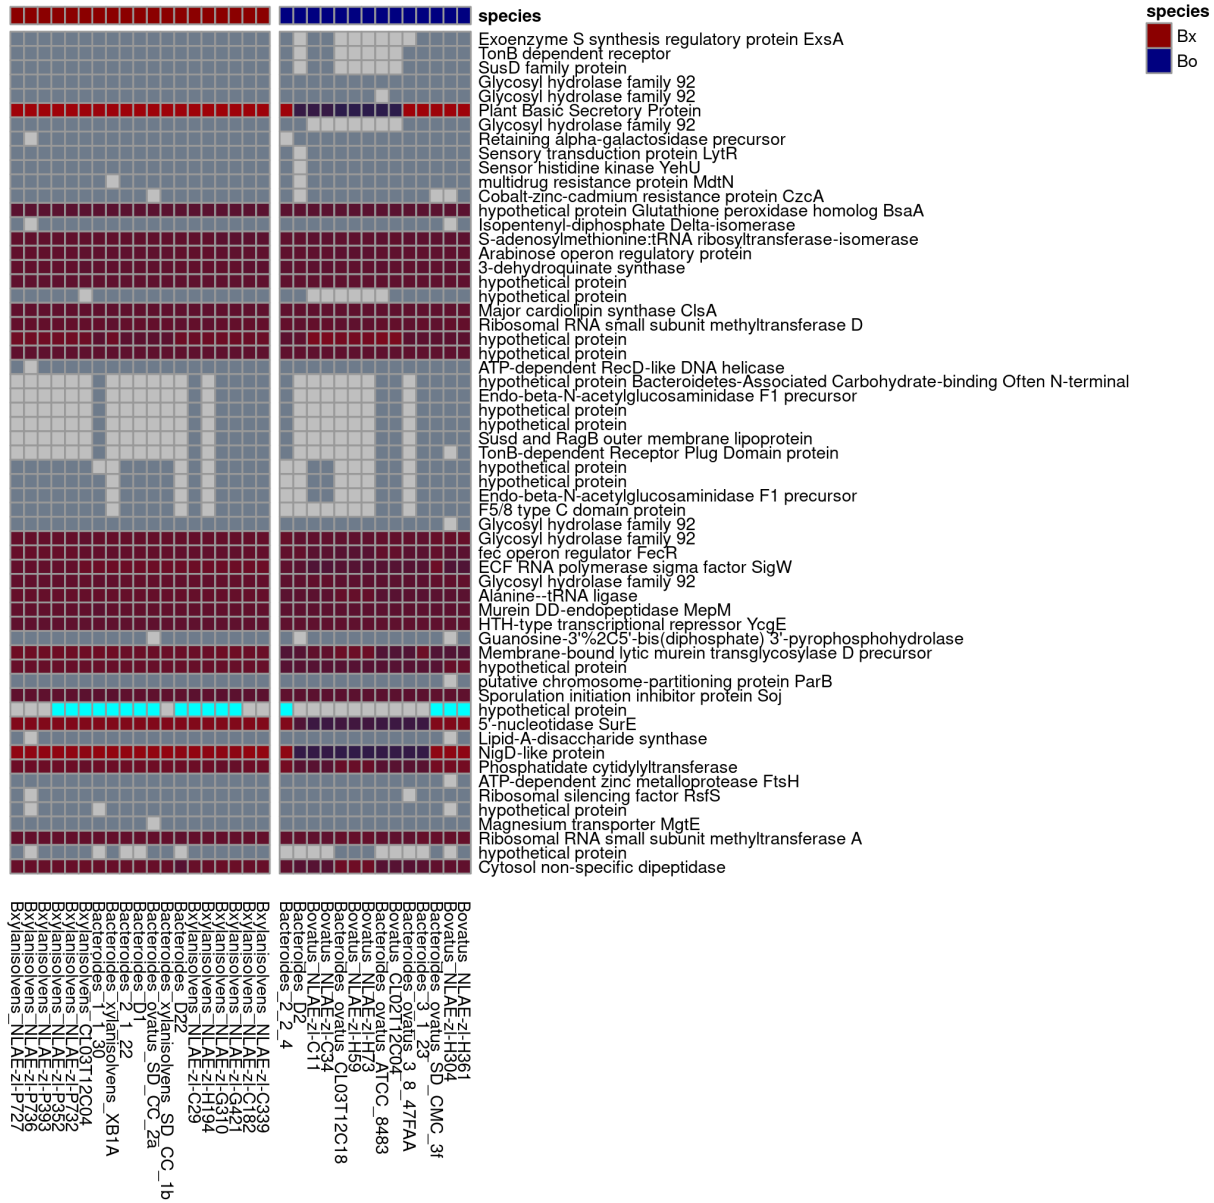

### B. ovatus non-PUL LGT Event 2

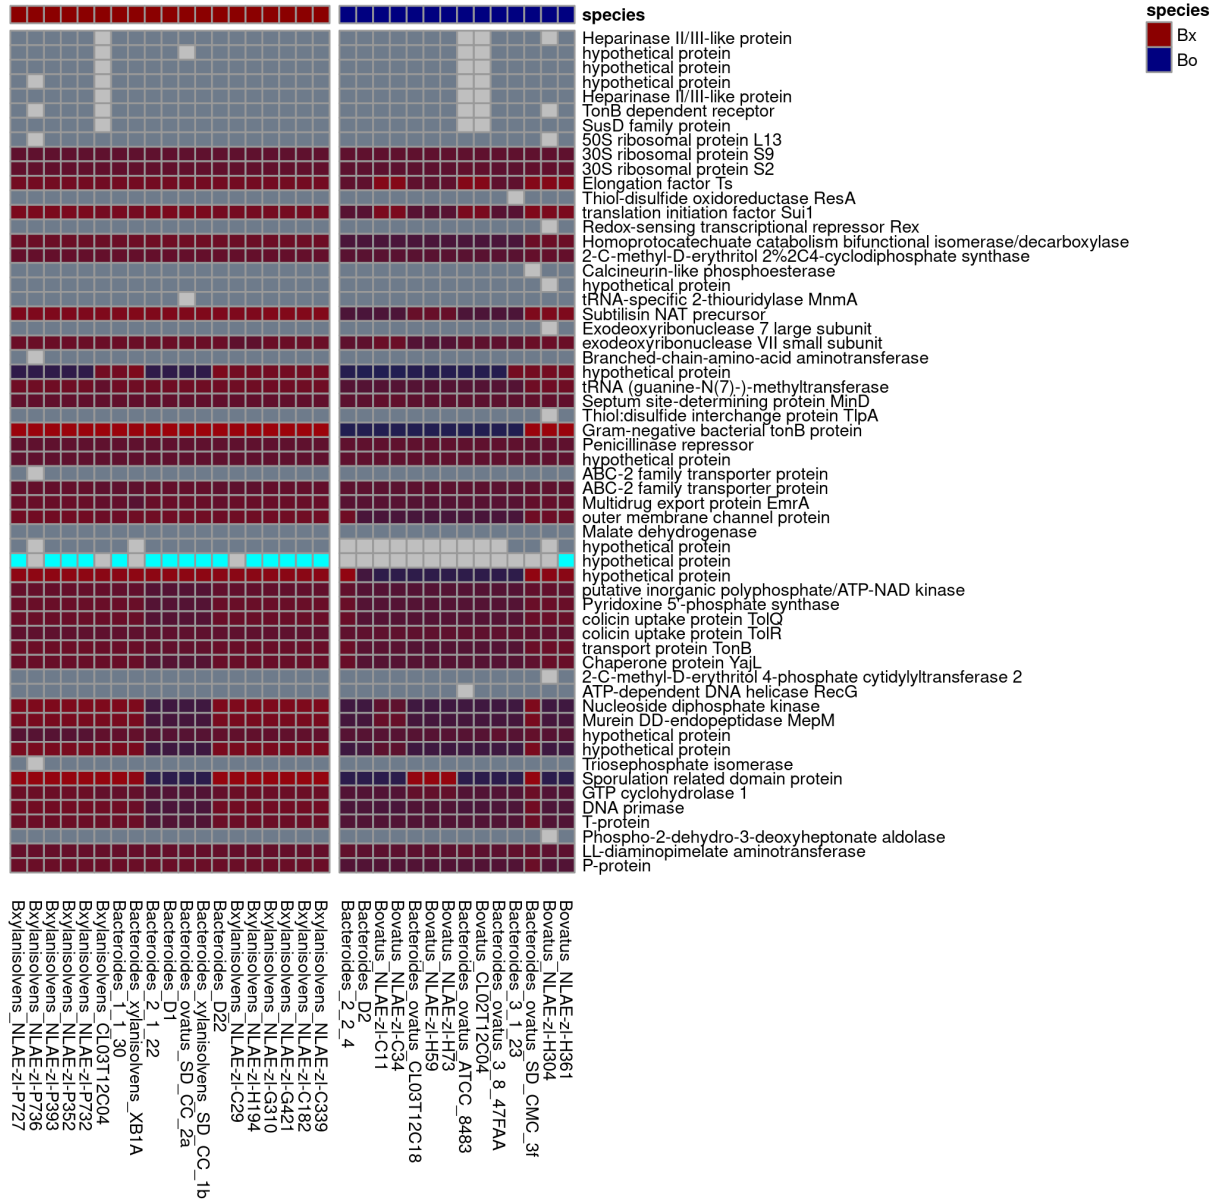





### B. ovatus non-PUL LGT Event 4

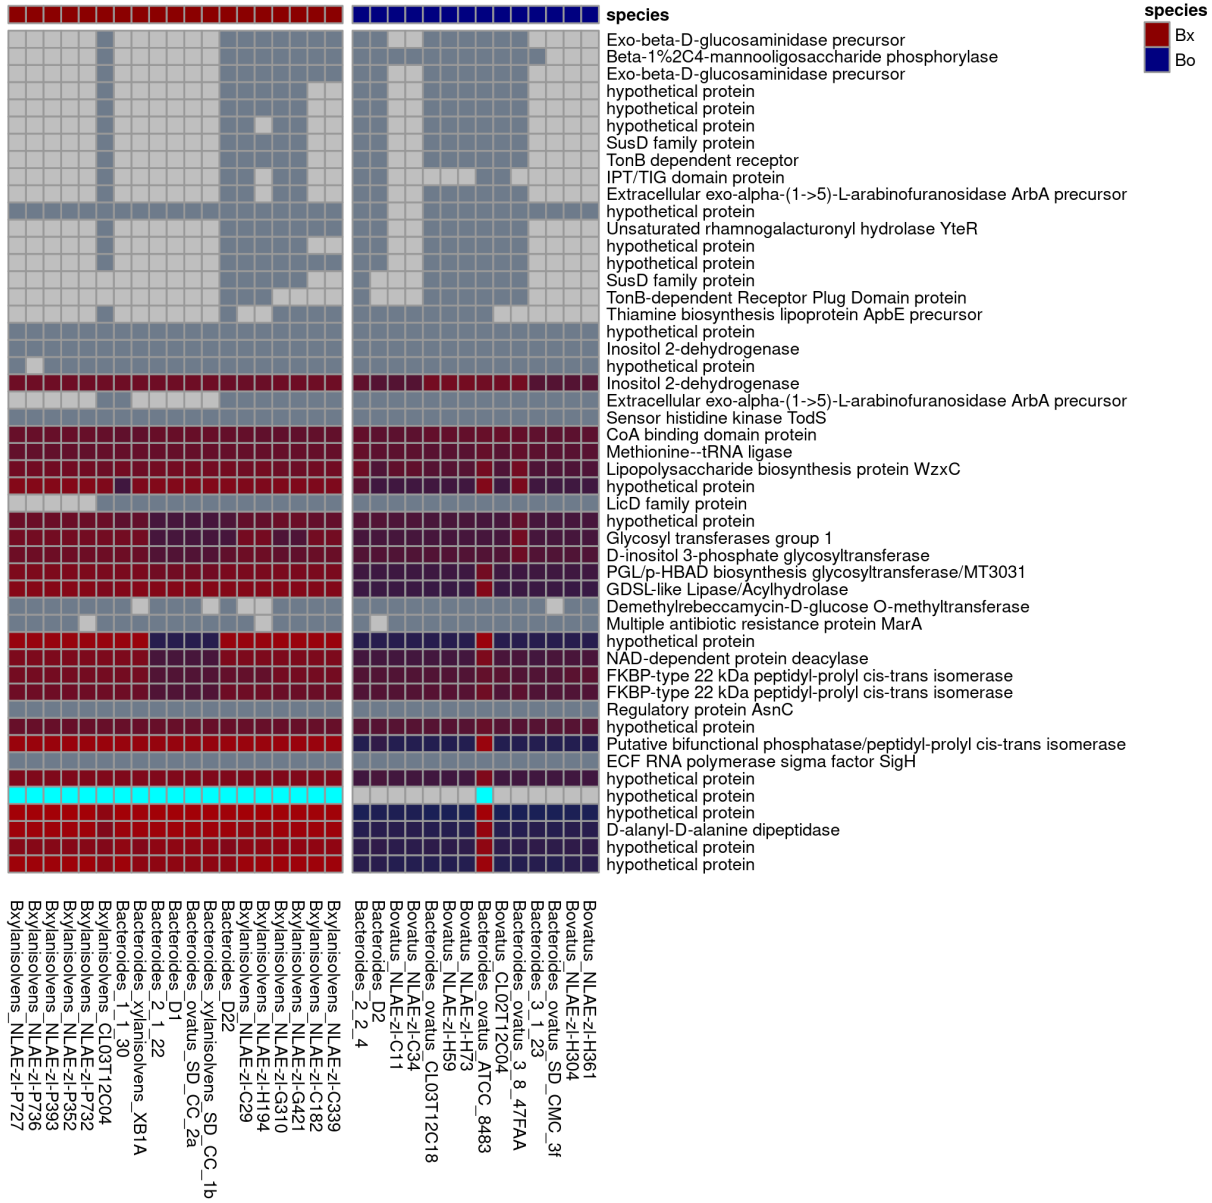

### B. ovatus non-PUL LGT Event 5

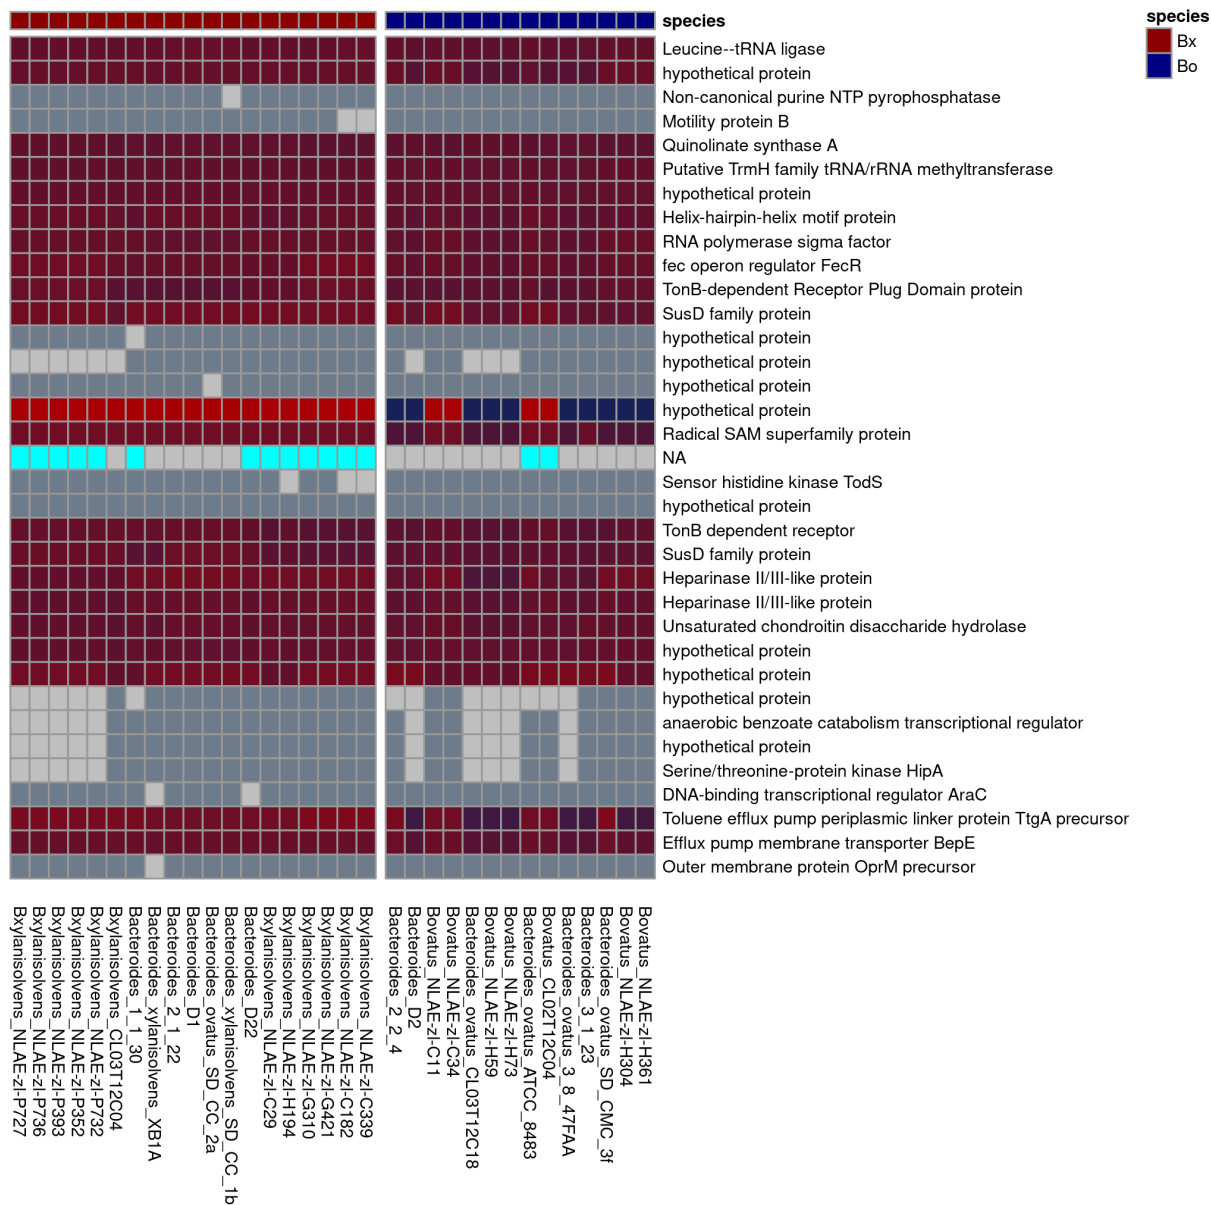

**B. ovatus non-PUL LGT Event 6**

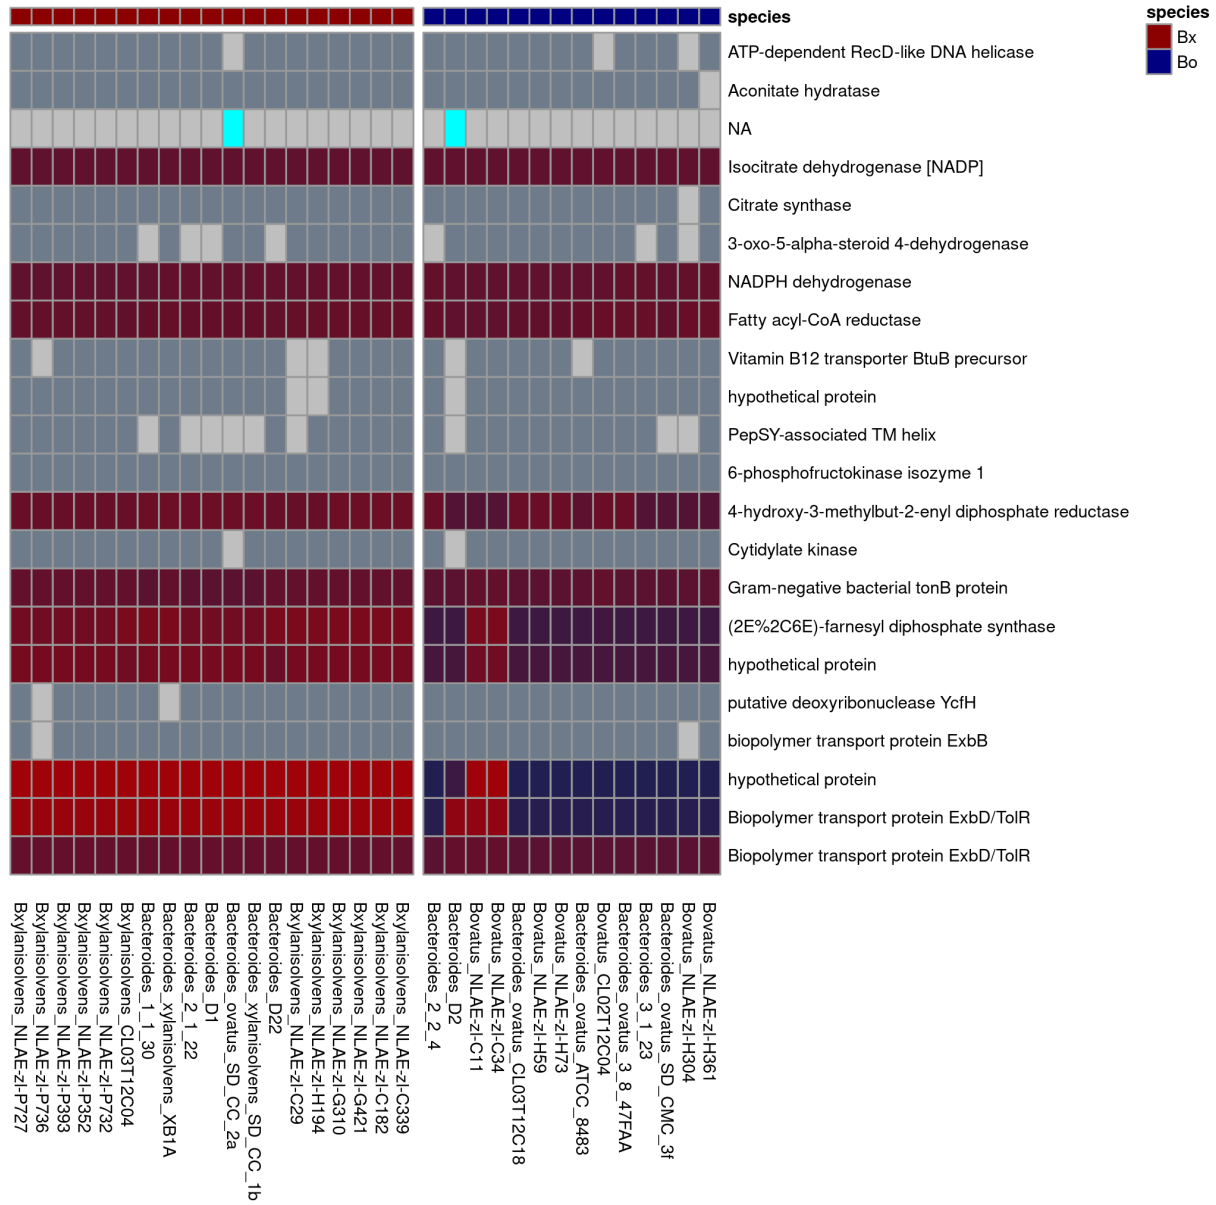

**B. ovatus non-PUL LGT Event 7**

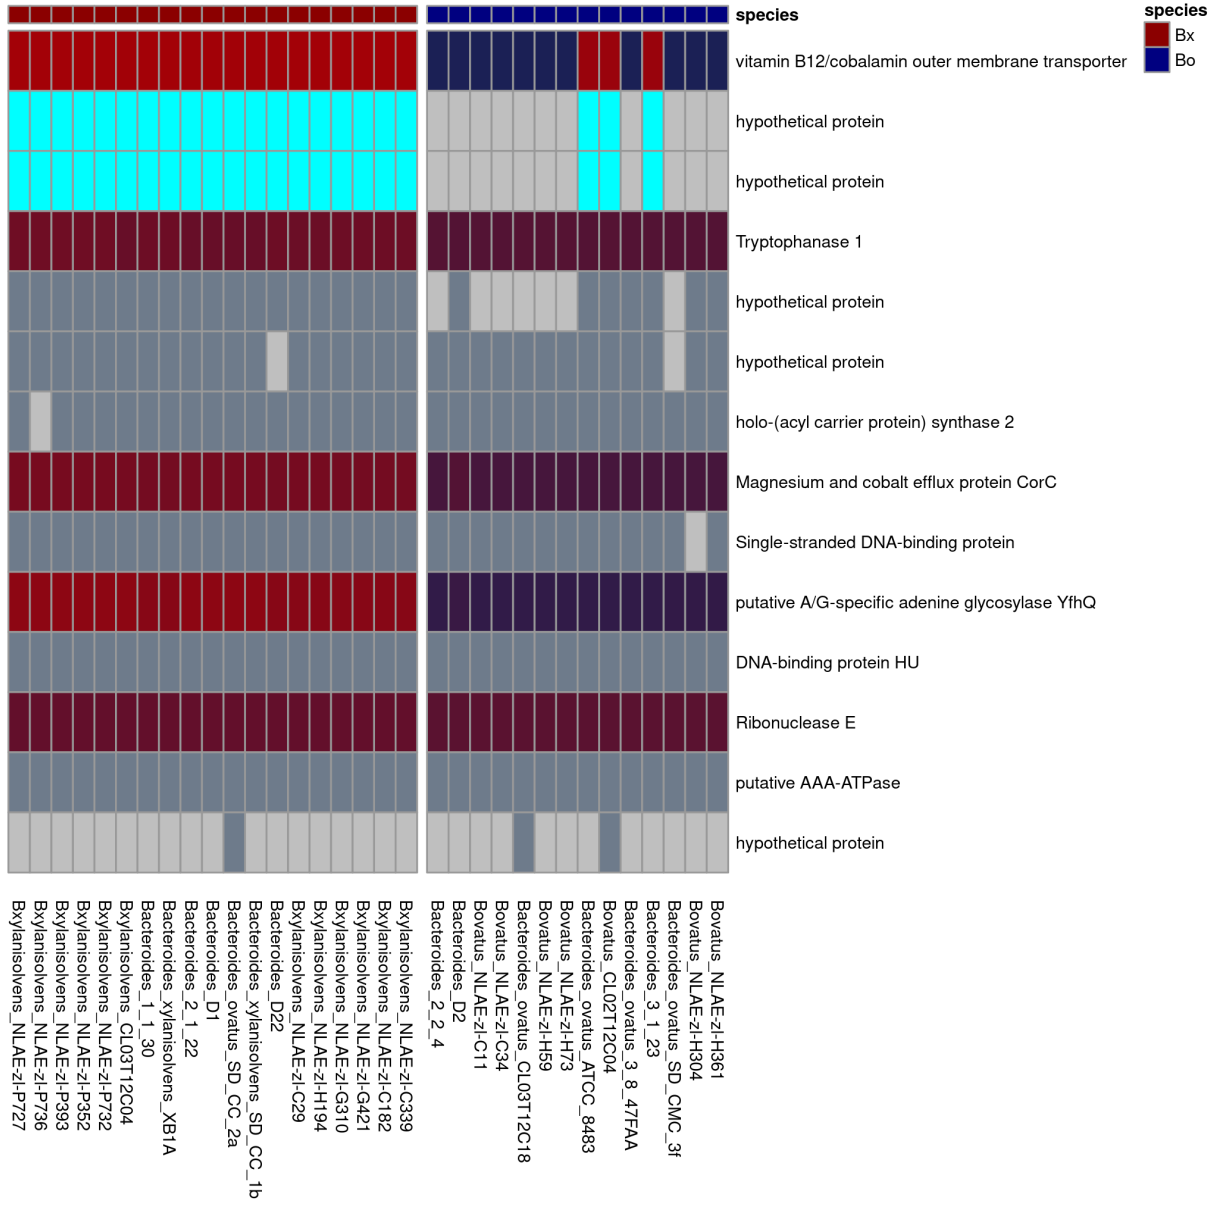

**B. ovatus non-PUL LGT Event 8**

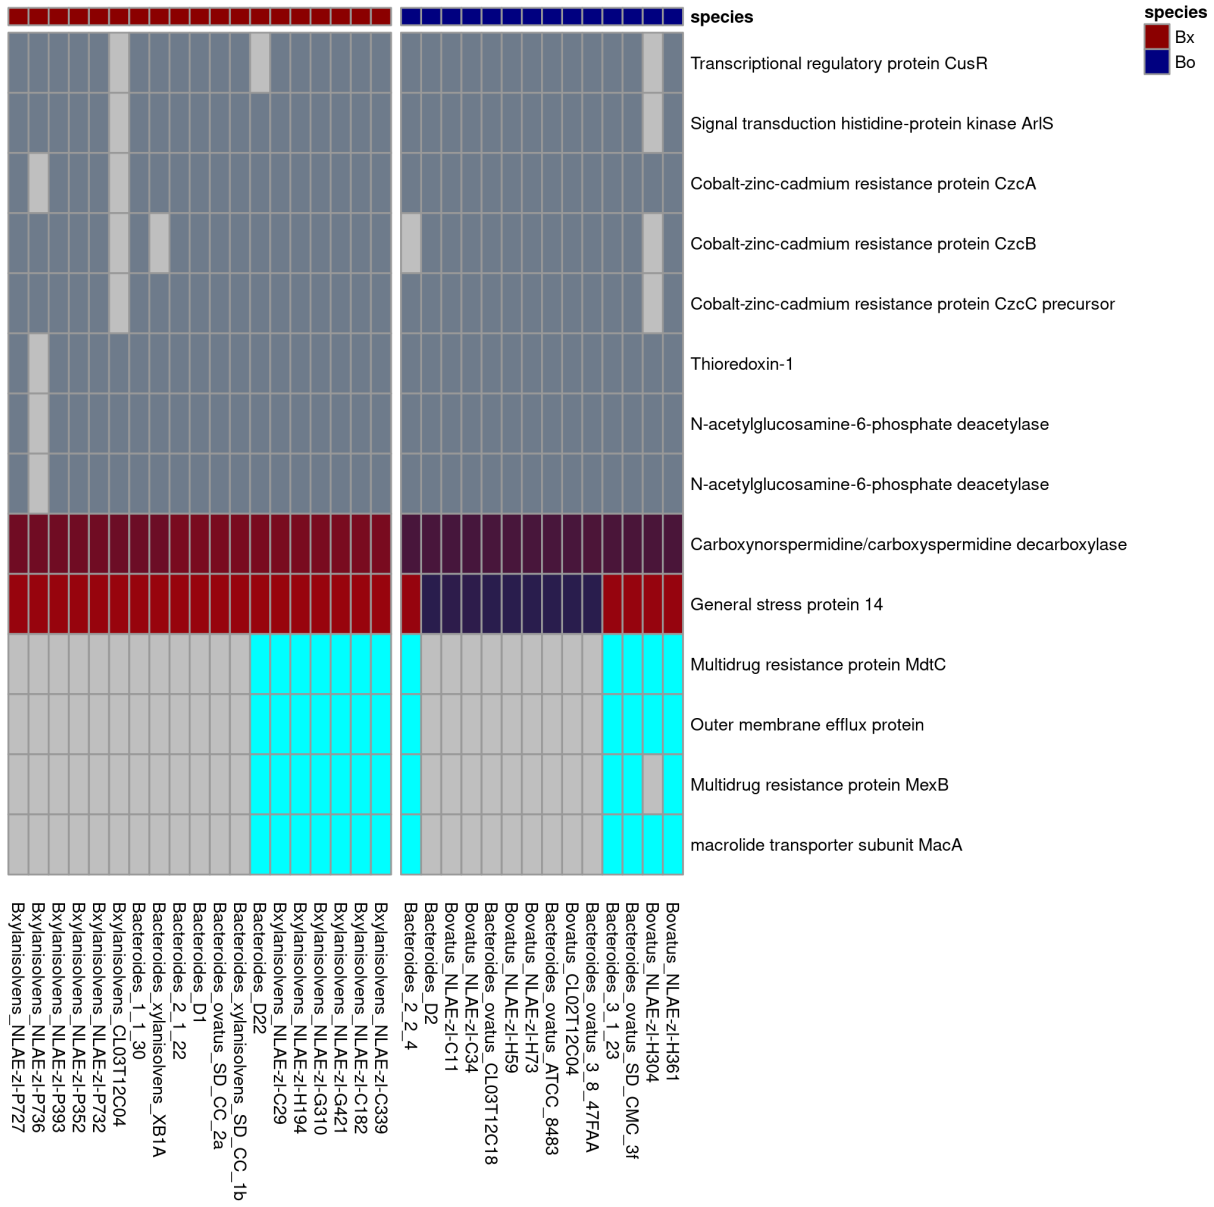

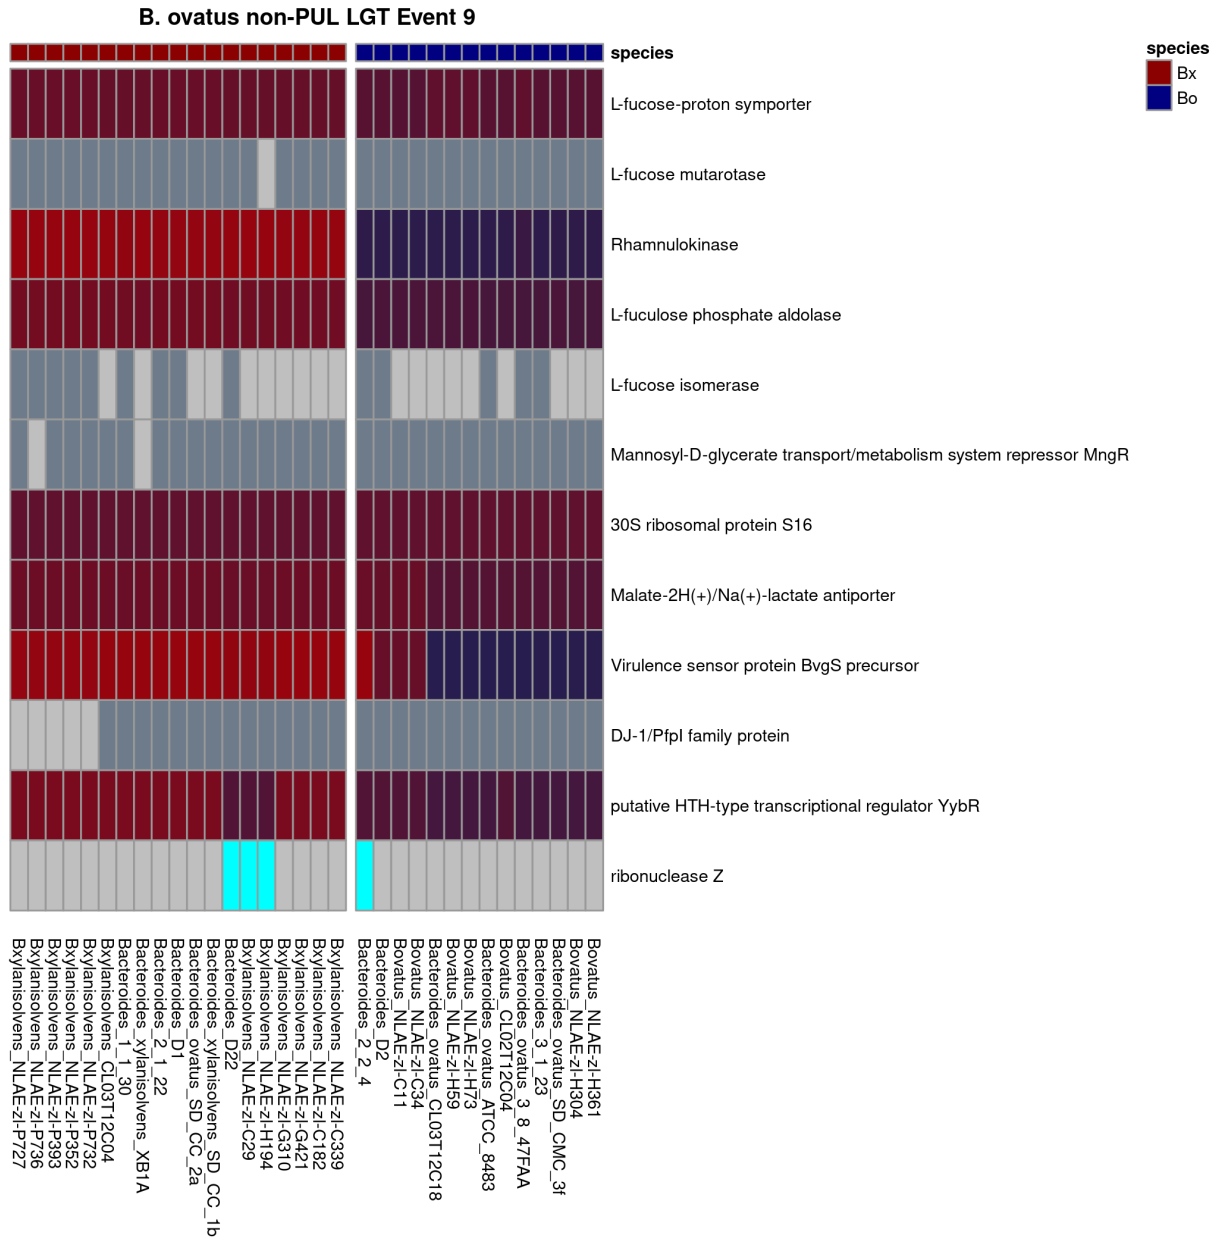

### B. xylanisolvans non-PUL LGT Event 1

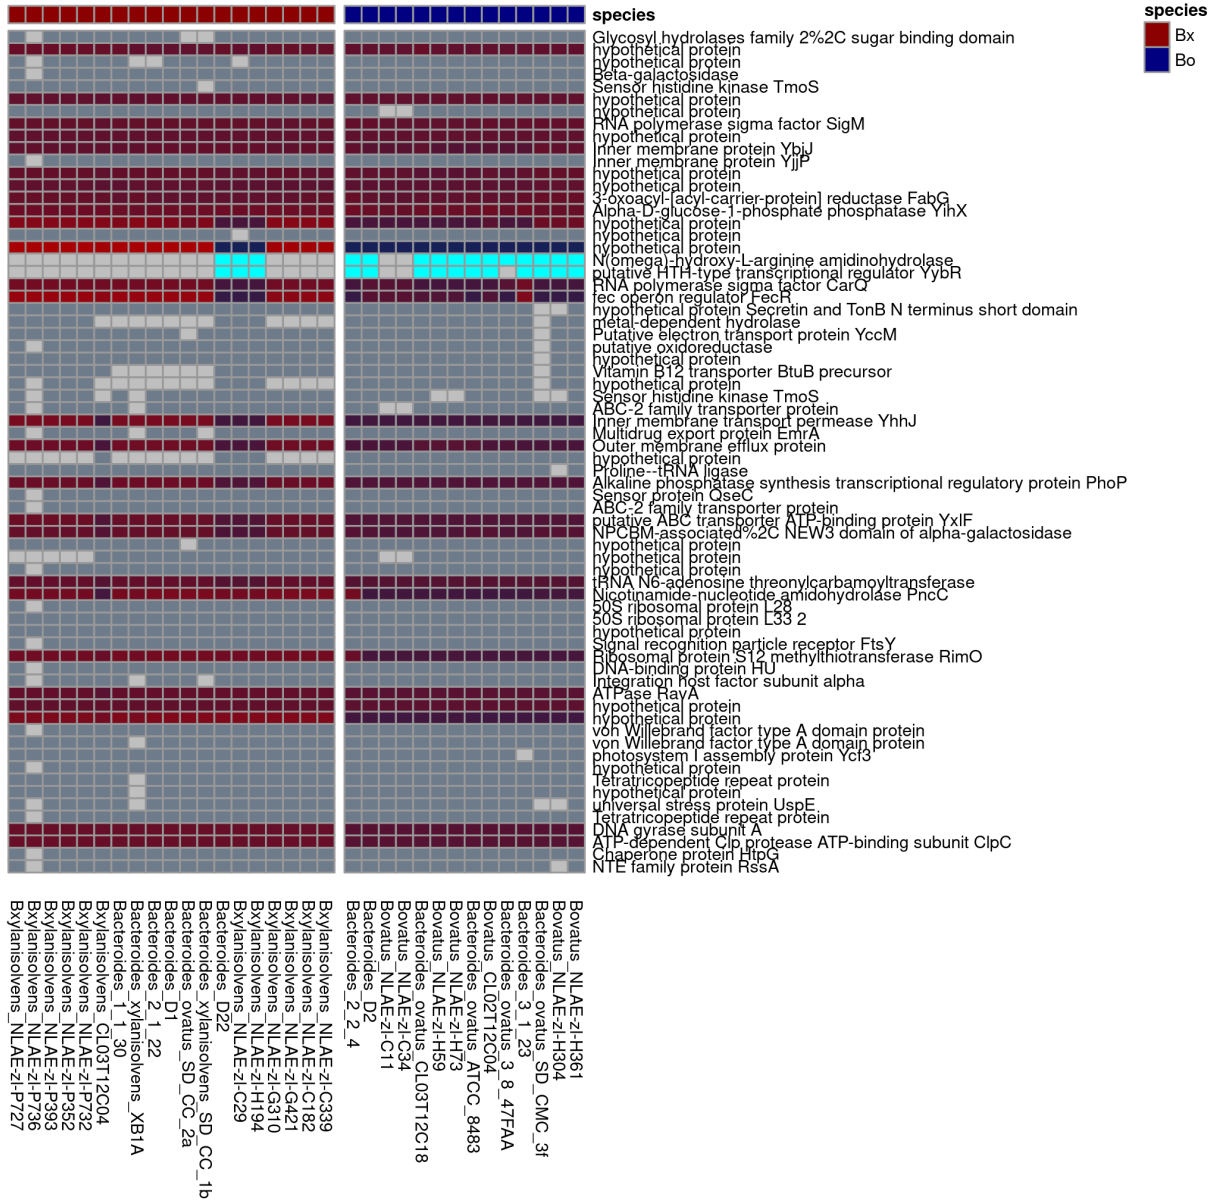



### B. xylanisolvans non-PUL LGT Event 2

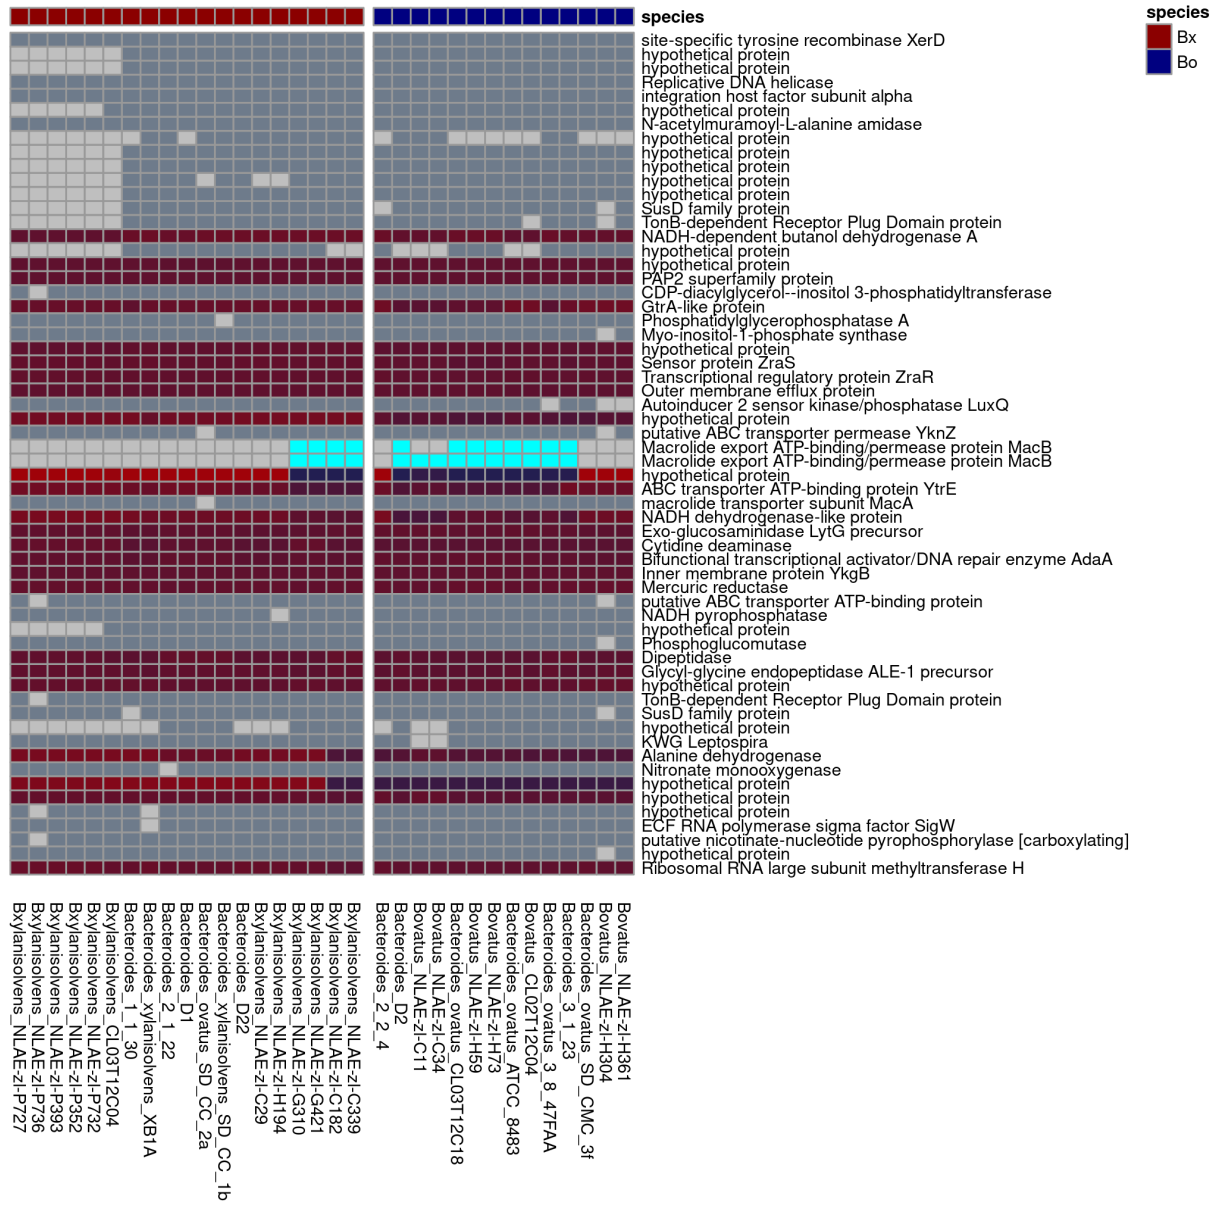

### B. xylanisolvans non-PUL LGT Event 3

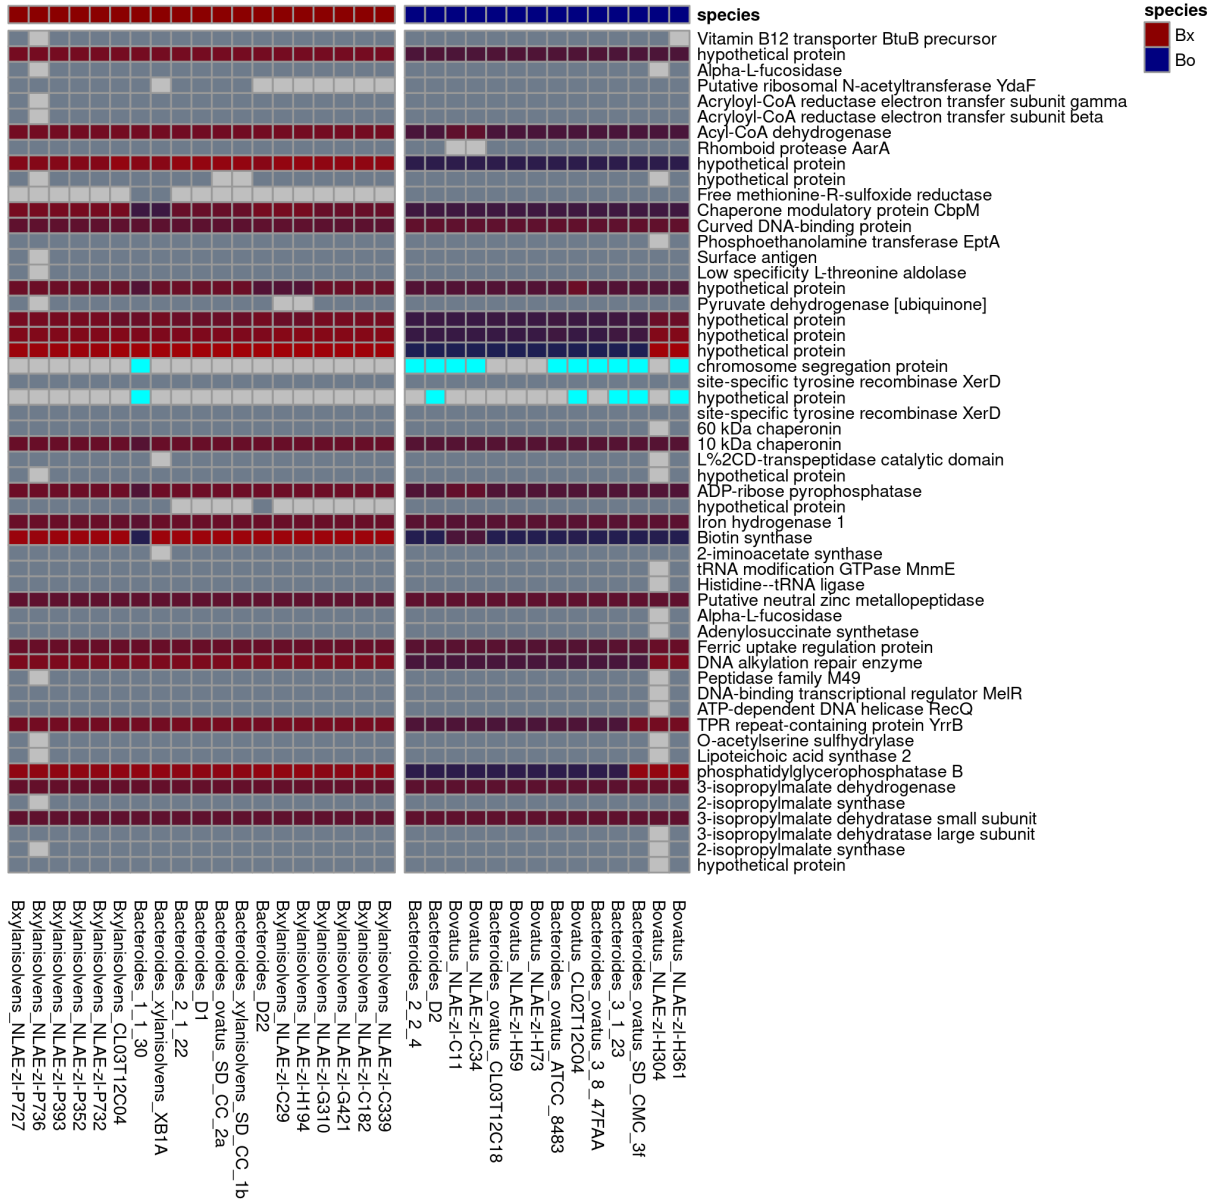

### B. xylanisolvans non-PUL LGT Event 4

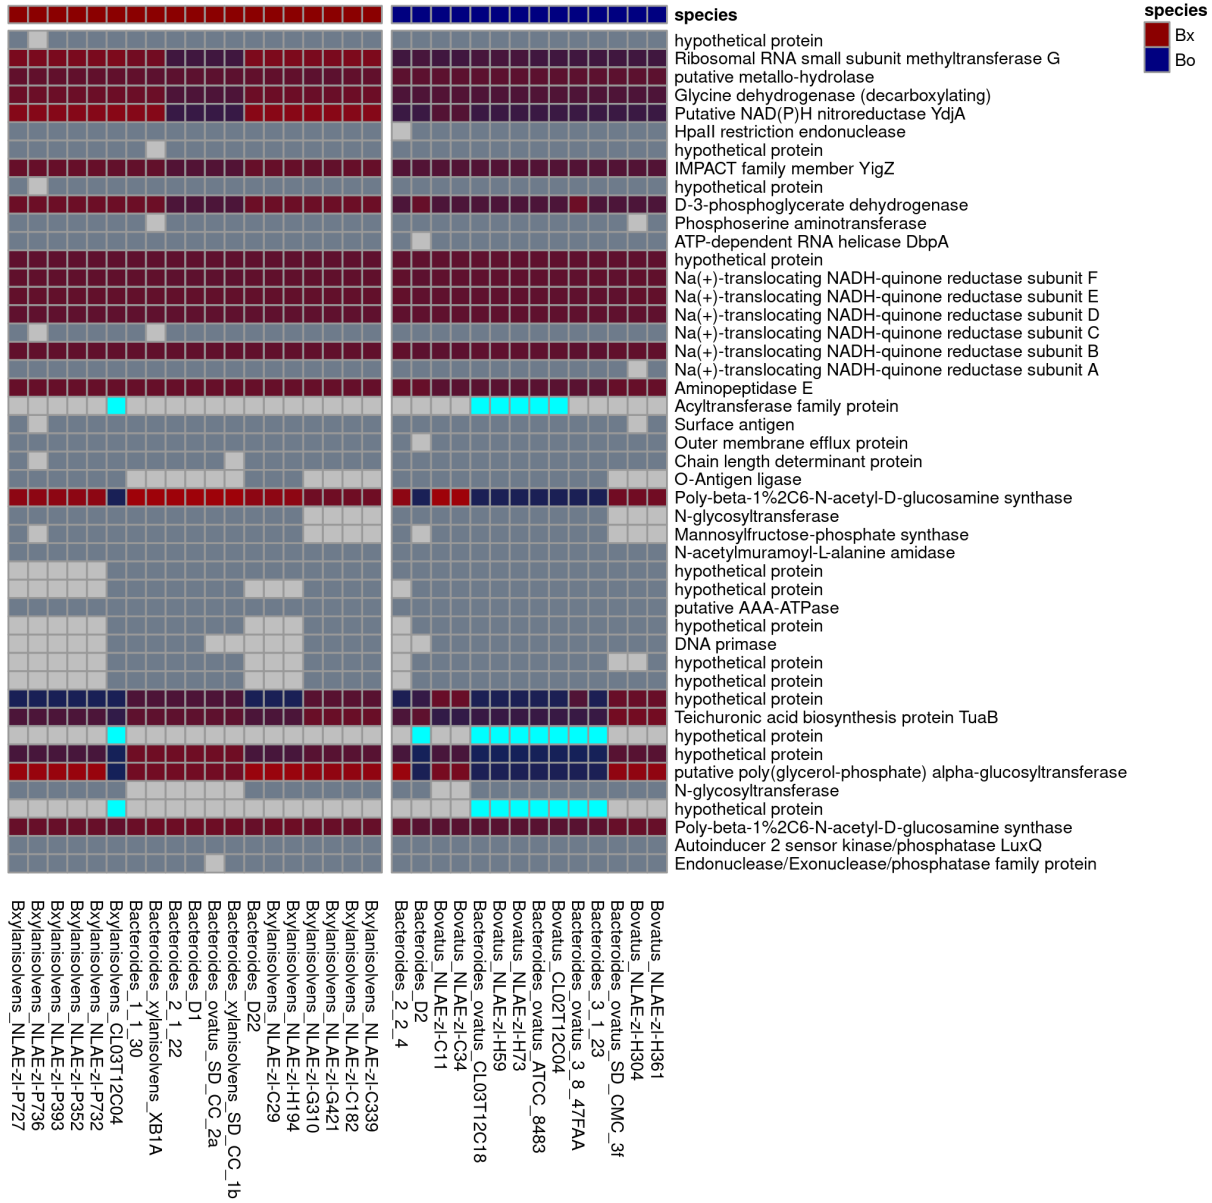

### B. xylanisolvans non-PUL LGT Event 5

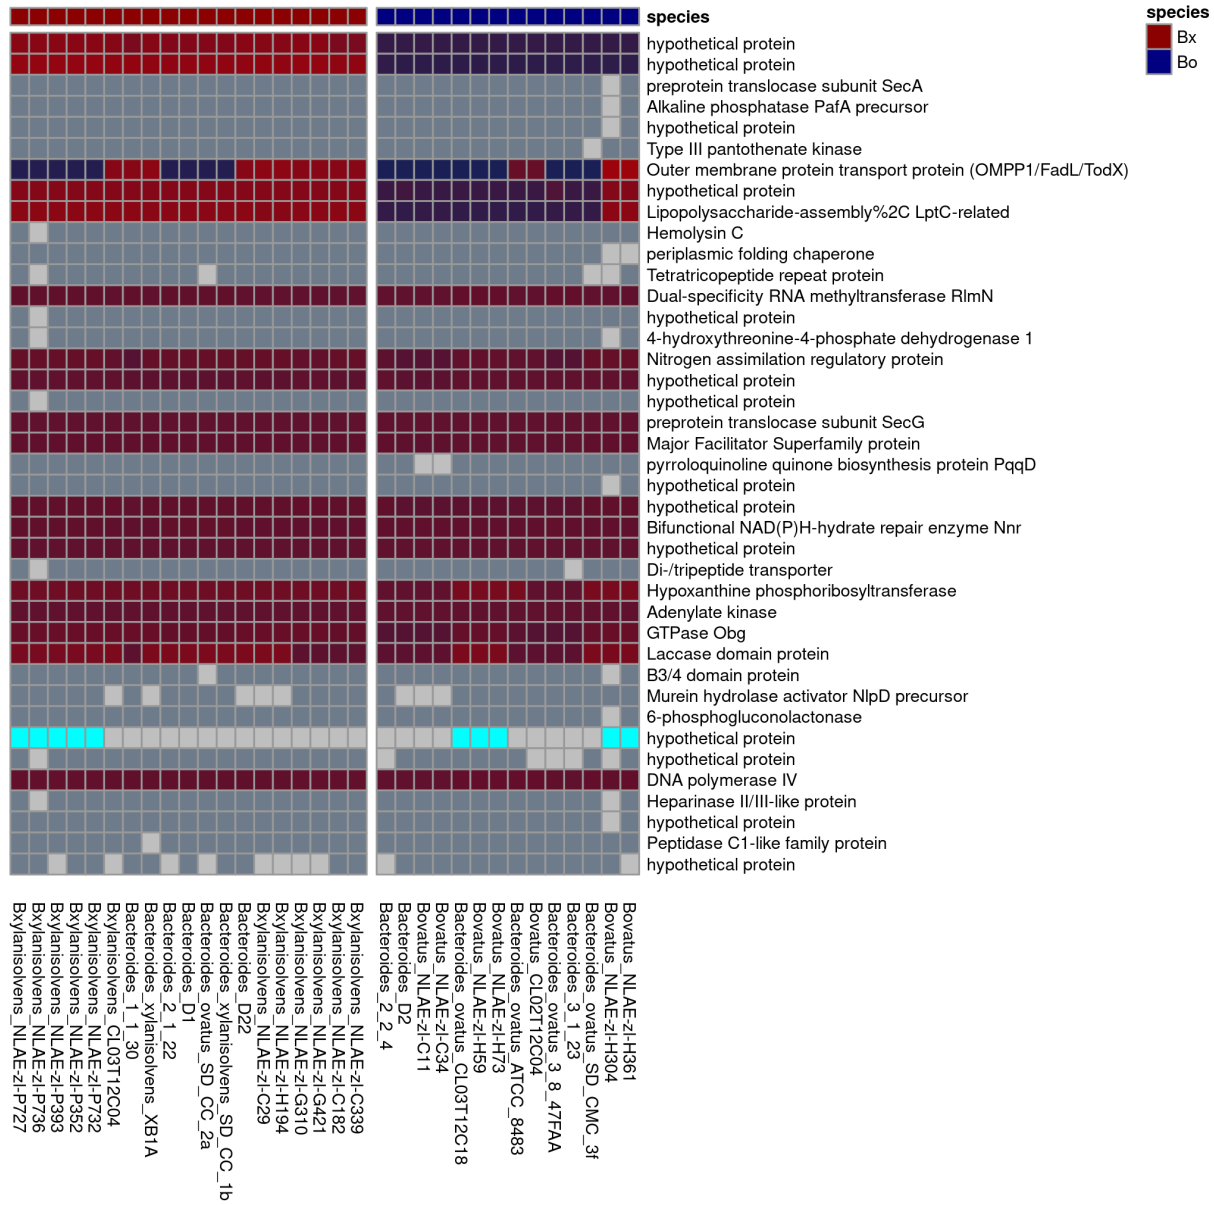

### B. xylanisolvans non-PUL LGT Event 6

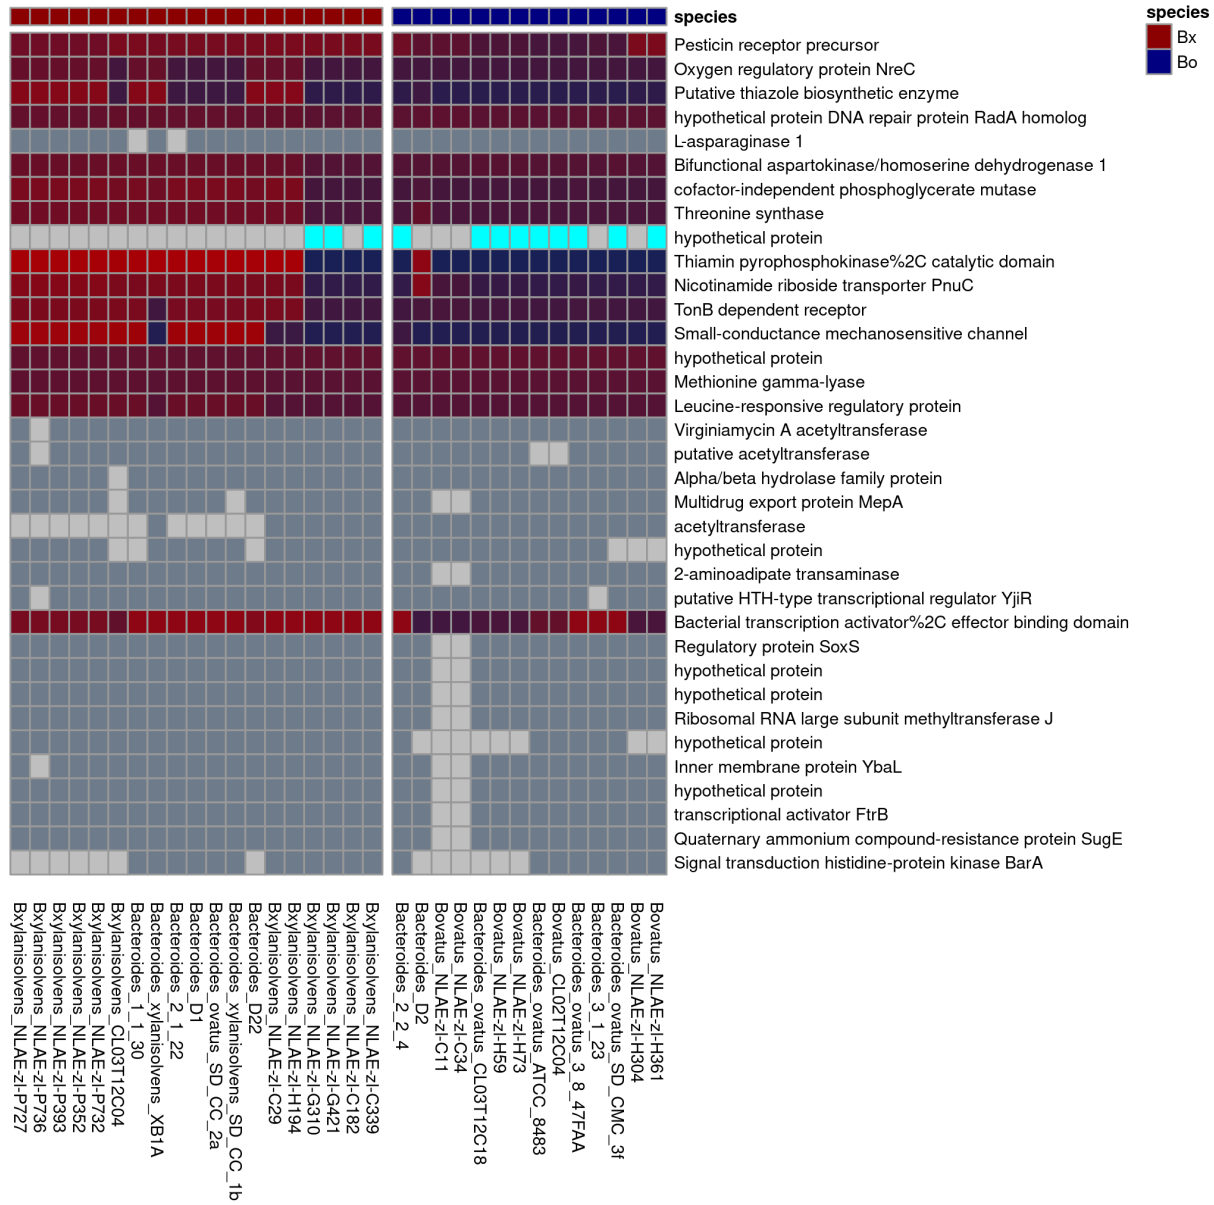

### B. xylanisolvans non-PUL LGT Event 7

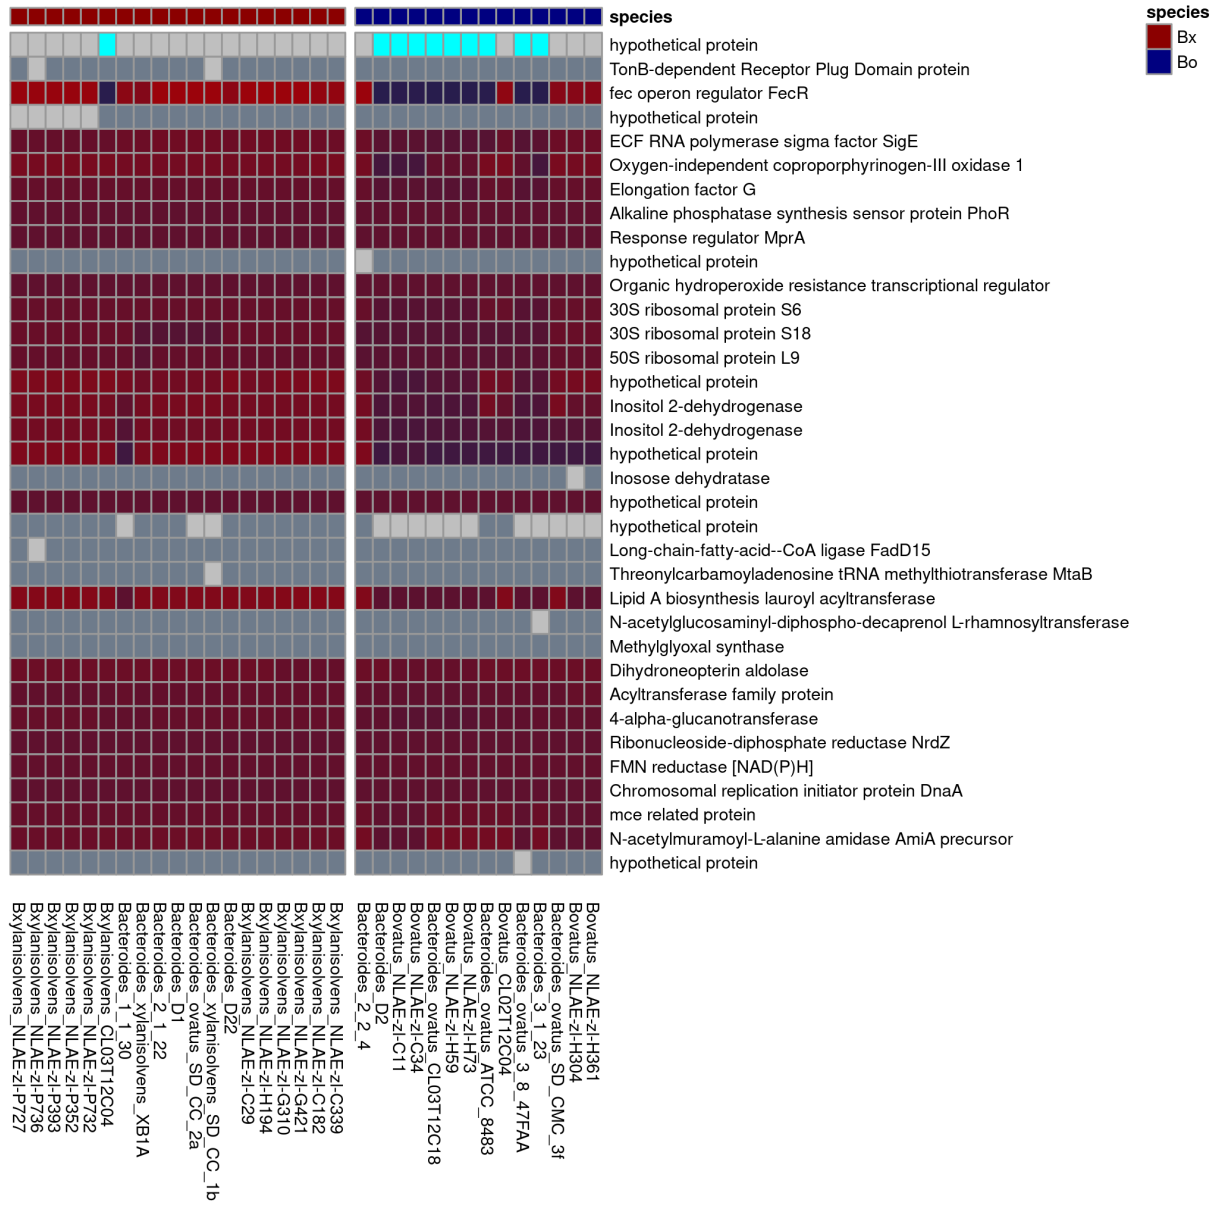

### B. xylanisolvans non-PUL LGT Event 8

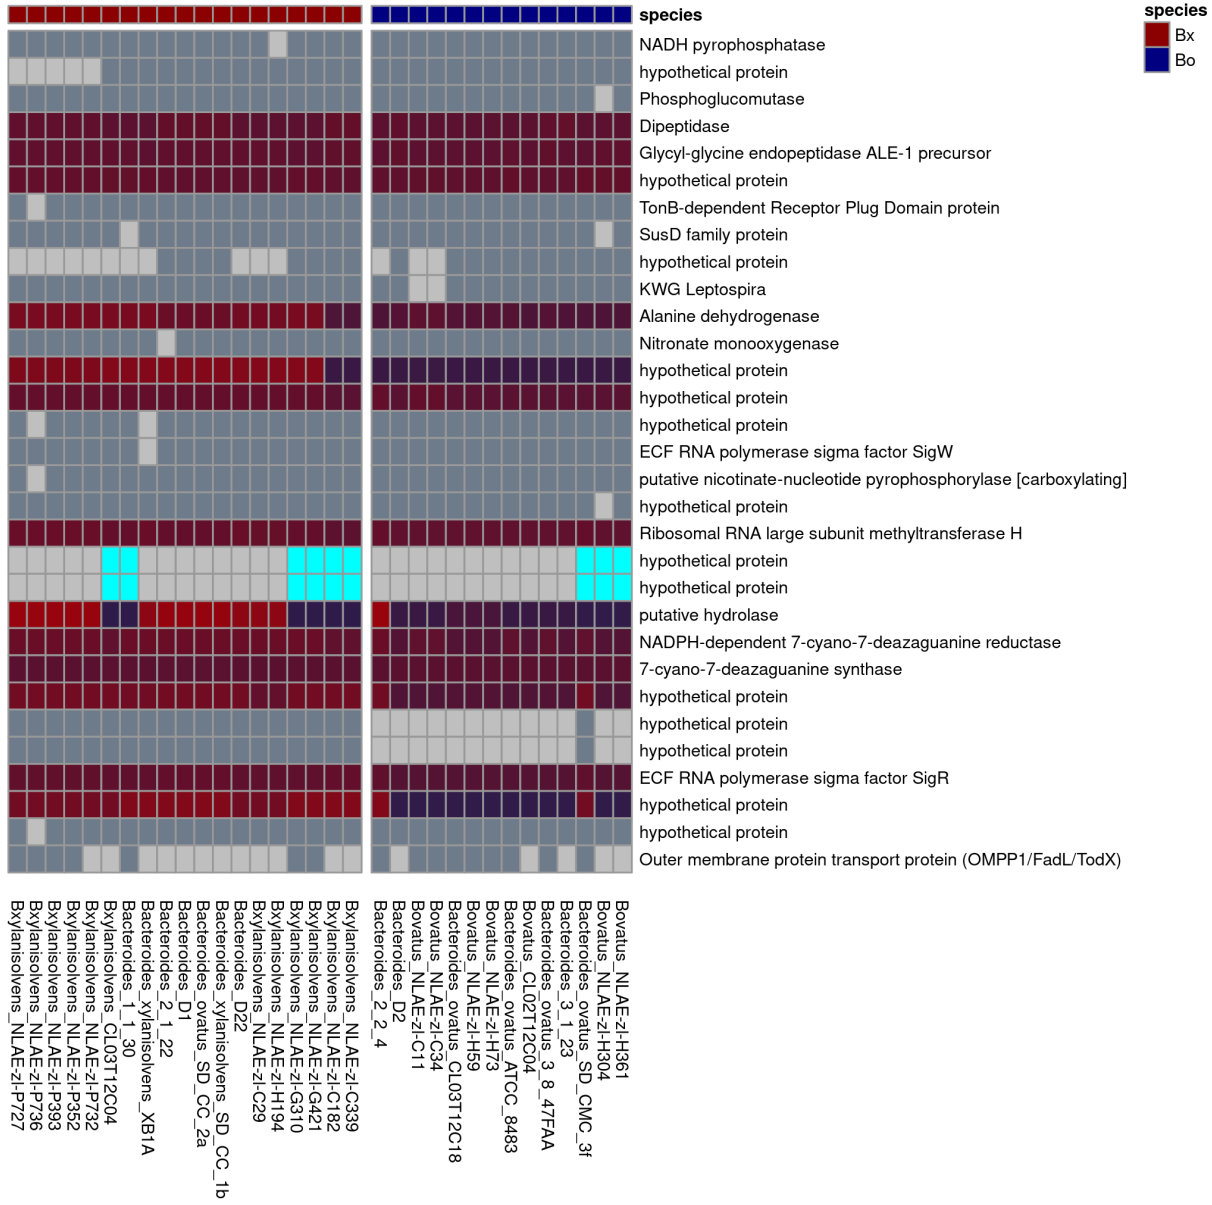

### B. xylanisolvans non-PUL LGT Event 9

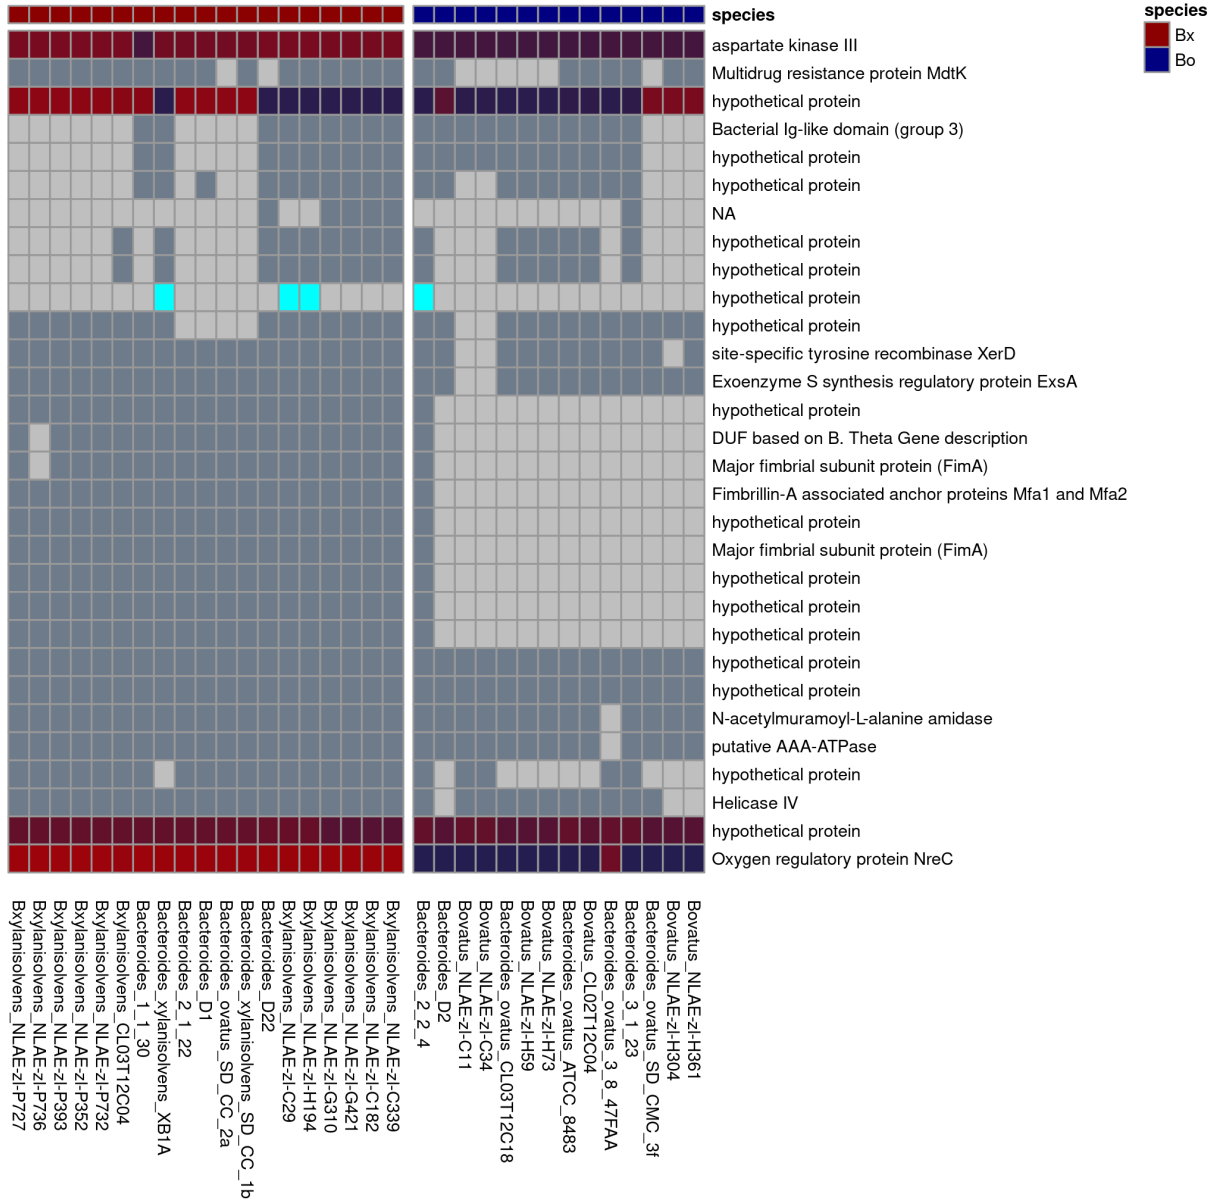



### B. xylanisolvans non-PUL LGT Event 10

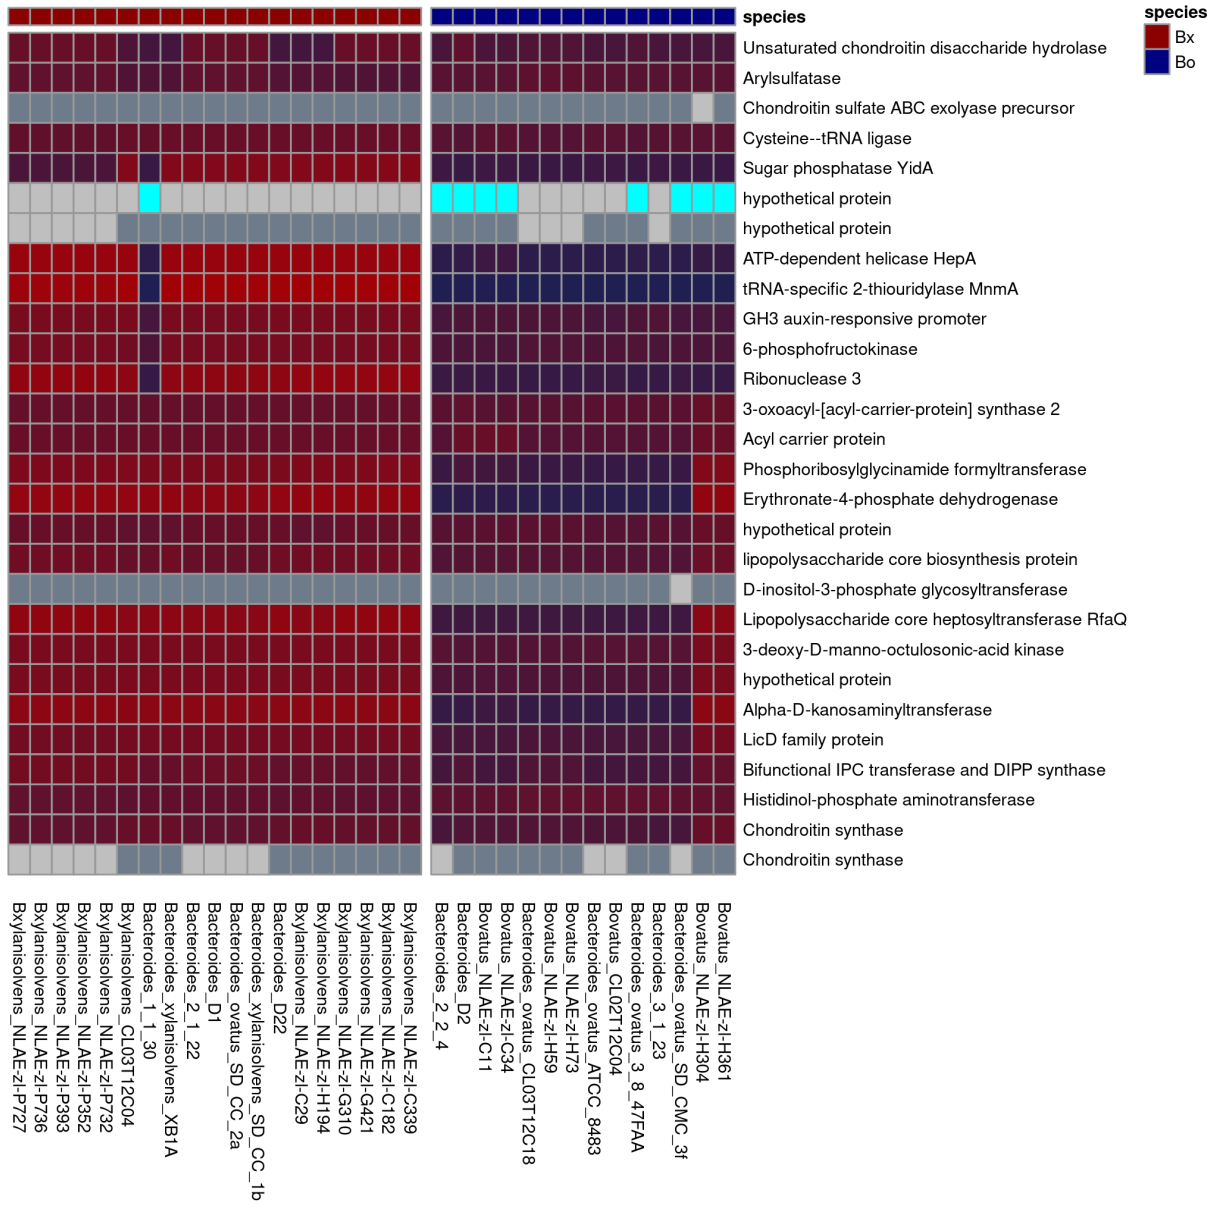

**B. xylanisolvans non-PUL LGT Event 11**

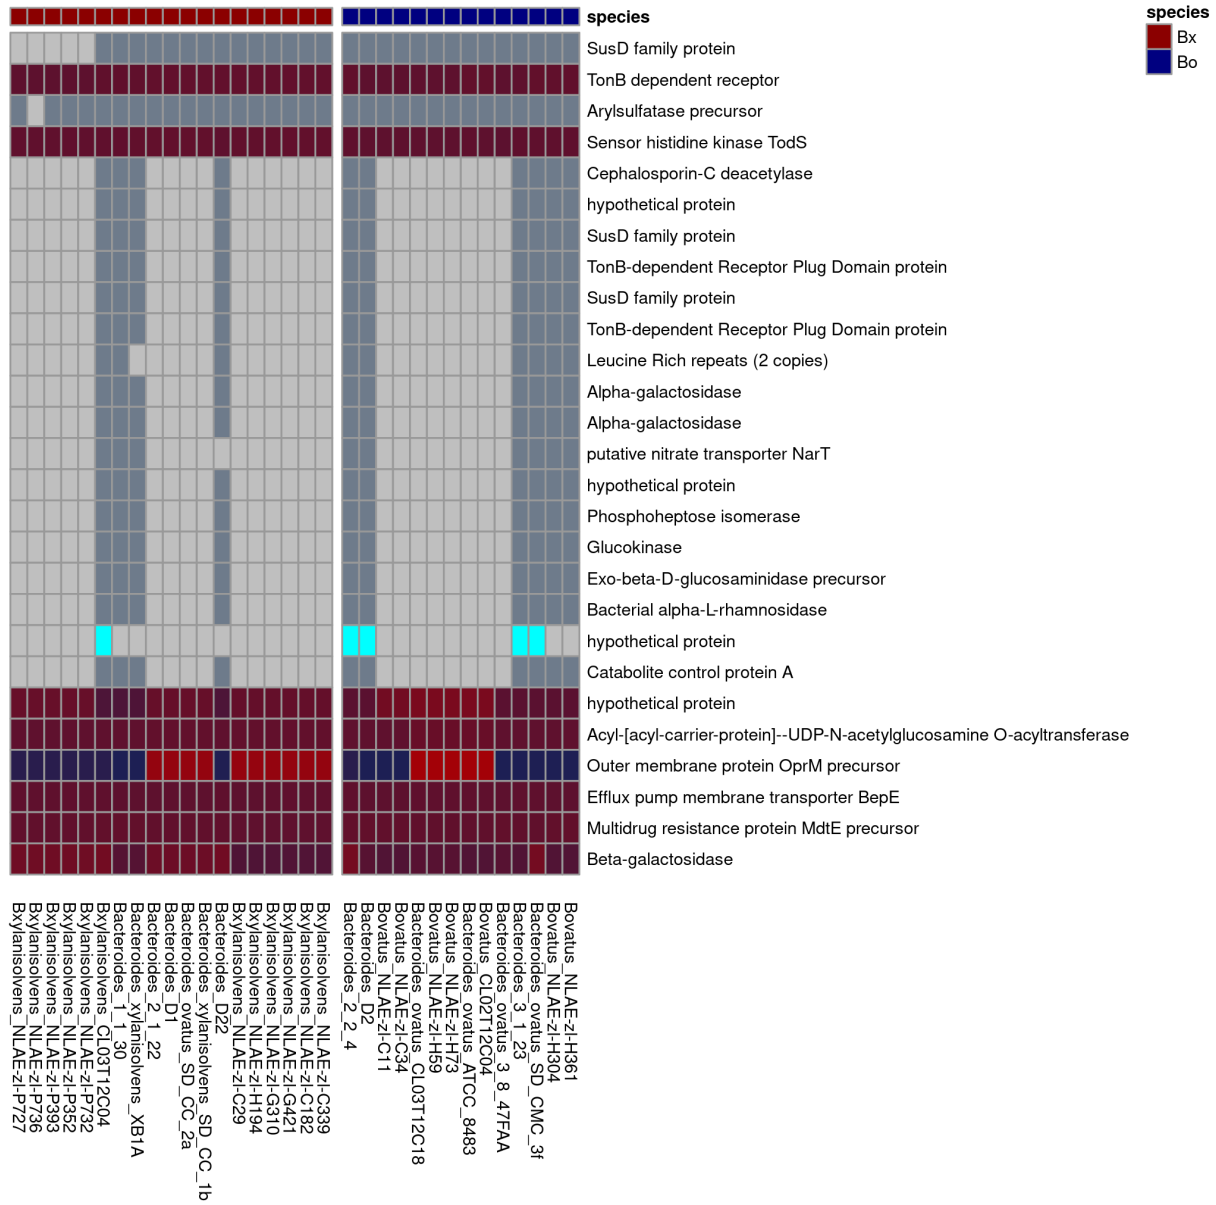



### B. xylanisolvans non-PUL LGT Event 13

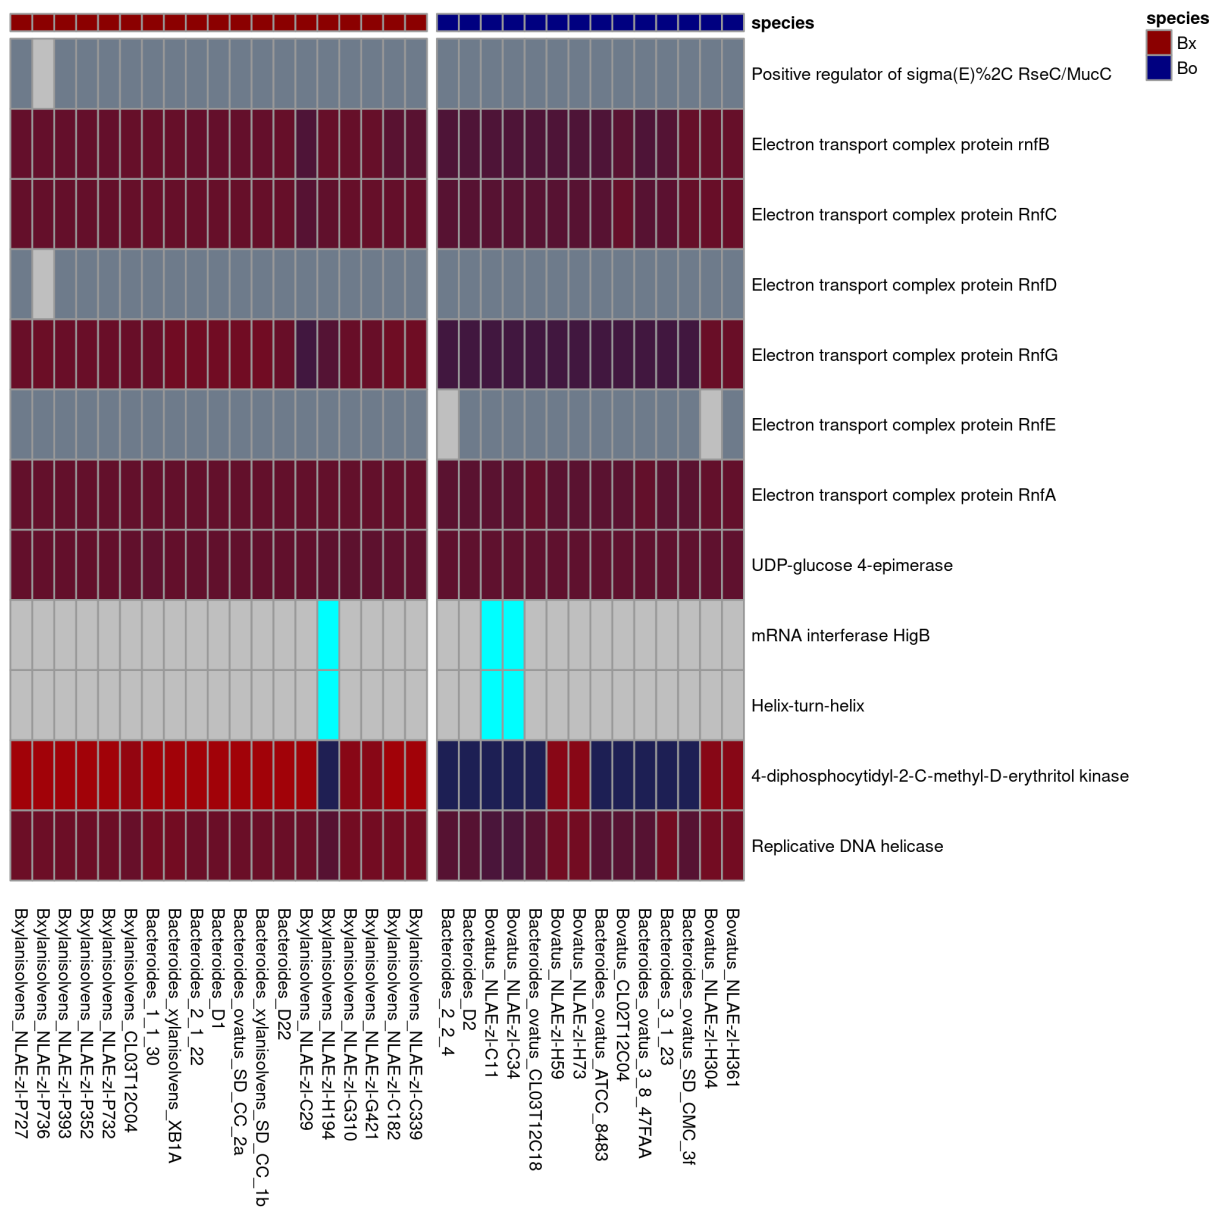

Figure S9

**A.** GalM, GluM PUL-A

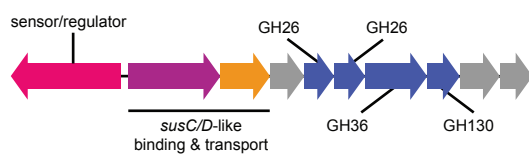

GalM, GluM PUL-B

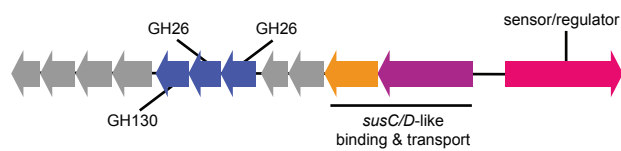

**B.** PUL-B expression during GalM growth

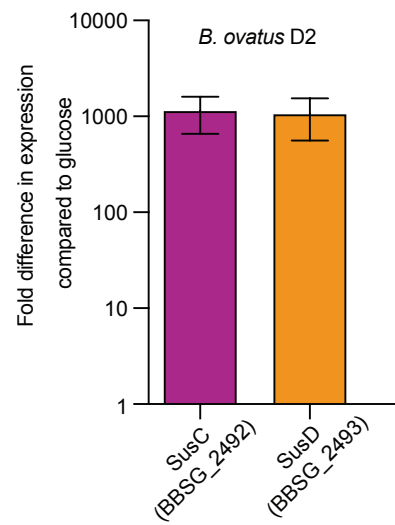

Source: https://www.biorxiv.org/content/10.1101/2021.07.15.452266v1.full.pdf
